1 **Multiple Mechanisms Inactivate the LIN-41 RNA-Binding Protein to Ensure A**

2 **Robust Oocyte-to-Embryo Transition in *Caenorhabditis elegans***

3

4

5 **Caroline A. Spike\*, Gabriela Huelgas-Morales\*, Tatsuya Tsukamoto\*, and David Greenstein\*,<sup>1</sup>**

6

7 \*Department of Genetics, Cell Biology and Development, University of Minnesota, Minneapolis,

8 Minnesota 55455, USA

9

10 Running title: Translational Regulation of Oogenesis

11

12 Keywords: oocyte meiotic maturation, the oocyte-to-embryo transition, translational

13 regulation, RNA-binding proteins, ubiquitin-mediated protein degradation

14

15 <sup>1</sup>Corresponding author: David Greenstein, Department of Genetics, Cell Biology, and

16 Development, University of Minnesota, 4-208 MCB, 420 Washington Avenue SE, Minneapolis,

17 MN 55455. Tel: 612-624-3955; FAX: 612-626-6140. E-mail: [green959@umn.edu](mailto:green959@umn.edu)

18

19

## ABSTRACT

20 In the nematode *Caenorhabditis elegans*, the conserved LIN-41 RNA-binding protein is a  
21 translational repressor that coordinately controls oocyte growth and meiotic maturation. LIN-  
22 41 exerts these effects, at least in part, by preventing the premature activation of the cyclin-  
23 dependent kinase CDK-1. Here we investigate the mechanism by which LIN-41 is rapidly  
24 eliminated upon the onset of meiotic maturation. Elimination of LIN-41 requires the activities of  
25 CDK-1 and multiple SCF-type ubiquitin ligase subunits, including the conserved substrate  
26 adaptor protein SEL-10/Fbw7/Cdc4, suggesting that LIN-41 is a target of ubiquitin-mediated  
27 protein degradation. Within the LIN-41 protein, two non-overlapping regions, Deg-A and Deg-B,  
28 are individually necessary for LIN-41 degradation; both contain several potential  
29 phosphodegron sequences, and at least one of these sites is required for LIN-41 degradation.  
30 Finally, Deg-A and Deg-B are sufficient, in combination, to mediate SEL-10-dependent  
31 degradation when transplanted into a different oocyte protein. Although LIN-41 is a potent  
32 inhibitor of protein translation and M-phase entry, the failure to eliminate LIN-41 from early  
33 embryos does not result in the continued translational repression of LIN-41 oocyte mRNA  
34 targets. Based on these observations, we propose a molecular model for the elimination of LIN-  
35 41 by SCF<sup>SEL-10</sup> and suggest that LIN-41 is inactivated before it is degraded. Furthermore, we  
36 provide evidence that another RNA-binding protein, the GLD-1 tumor suppressor, is regulated  
37 similarly. Redundant mechanisms to extinguish translational repression by RNA-binding  
38 proteins may both control and provide robustness to irreversible developmental transitions,  
39 including meiotic maturation and the oocyte-to-embryo transition.

40

## INTRODUCTION

41 The genetic pathways controlling developmental decisions have evolved to be robust to  
42 perturbations stemming from environmental change, nutrient deprivation, and endogenous  
43 genetic variation (reviewed by Hammerstein *et al.* 2005; Félix and Wagner 2008). At a genetic  
44 level, robustness stems in large part from redundancy of control and feedback and feed-  
45 forward regulatory mechanisms built into the pathways. In turn, redundancy in genetic control  
46 also provides a hardy and permissive substrate to support evolutionary change (reviewed by  
47 Prince and Pickett 2002; Vavouri *et al.* 2008). Ultimately, the robustness of genetic pathways is  
48 central to the preservation of the germline, the immortal cell lineage required for sexual  
49 reproduction and perpetuation of a species. Cell fate decisions in the germline fall into two  
50 broad classes, those that are plastic and those that represent irreversible all-or-none  
51 commitments. For example, in several organisms the differentiated progeny of germline stem  
52 cells can dedifferentiate to repopulate the stem cell niche in response to adverse conditions  
53 that deplete the stem cell pool (Brawley and Matunis 2004; Kai and Spradling 2004; Nakagawa  
54 *et al.* 2007, 2010; Cheng *et al.* 2008; Barroca *et al.* 2009). By contrast, the commitment of an  
55 oocyte to complete meiosis and undergo fertilization represents an irrevocable decision. Here  
56 we explore the molecular genetic mechanisms controlling the commitment to fertilization  
57 during the final stages of oogenesis in the nematode *Caenorhabditis elegans*.

58 In *C. elegans*, as in many animals, fully grown oocytes are transcriptionally quiescent  
59 and depend on a maternal load of protein and messenger RNA to complete their development.  
60 As a consequence, the dramatic cell cycle and developmental changes that occur during the

61 transition from oogenesis to embryogenesis are driven by post-transcriptional mechanisms.  
62 Such mechanisms include protein phosphorylation, the elimination of maternally-provided  
63 proteins or mRNAs, and the regulation of maternal mRNA translation (reviewed by Verlhac *et*  
64 *al.* 2010; Robertson and Lin 2015; Svoboda *et al.* 2017). The oocyte-to-embryo transition (OET)  
65 initiates when oocytes exit meiotic prophase and enter the first meiotic metaphase (MI), a cell  
66 cycle and developmental event also known as meiotic resumption or meiotic maturation. The  
67 OET completes when zygotic gene transcription begins after fertilization in the early embryo.

68         Pioneering studies using amphibian oocytes established that oocyte meiotic maturation  
69 is initiated by the activation of maturation-promoting factor (MPF), in response to progesterone  
70 from the follicle cells (Masui and Markert 1971; reviewed by Masui 2001). The principal  
71 components of MPF are the cyclin-dependent kinase Cdk1 catalytic subunit and a cyclin B  
72 regulatory subunit (Dunphy *et al.* 1988; Gautier *et al.* 1988, 1990; Lohka *et al.* 1988; reviewed  
73 by Nurse 1990). In *Xenopus*, which represents the best-studied system from a biochemical  
74 standpoint, MPF activation involves the translation of multiple, apparently redundantly-acting  
75 factors, including the cMos protein kinase, B-type cyclins, RINGO/Speedy, and proteins that  
76 remain to be identified (Kobayashi *et al.* 1991; Minshull *et al.* 1991; Nebreda *et al.* 1995; Frank-  
77 Vaillant *et al.* 1999; Haccard and Jessus 2006a; reviewed by Haccard and Jessus 2006b). Once  
78 activated, MPF stimulates multiple positive feedback mechanisms, including the activation of  
79 the Greatwall kinase, which phosphorylates and activates the protein phosphatase 2A (PP2A)  
80 inhibitor  $\alpha$ -endosulfine (Yu *et al.* 2006; Zhao *et al.* 2008; Von Stetina *et al.* 2008; Castilho *et al.*  
81 2009; Mochida *et al.* 2010). The inhibition of PP2A results in the activation of the CDC25  
82 phosphatase, which removes the inhibitory CDK1 phosphorylations at Thr14 and Tyr15

83 catalyzed by the Wee1 or Myt1 kinases (Kornbluth *et al.* 1994; Mueller *et al.* 1995). The initial  
84 signal from MPF activation is amplified in a feed-forward mechanism in which active CDK  
85 promotes the inactivation of its inhibitors, Wee1 and Myt1 (reviewed by Ferrell 1999a,b), and  
86 stimulates its activator, CDC25 (Kumagai and Dunphy 1996). This regulatory mechanism  
87 generates the “switch-like” activation of MPF that promotes the rapid and irreversible cell cycle  
88 transition from prophase to metaphase (reviewed by O’Farrell *et al.* 2001; Kishimoto 2015).

89 MPF is the master regulator of cell cycle progression during oocyte meiotic maturation  
90 in *C. elegans* as in all examined species (Boxem *et al.* 1999; Burrows *et al.* 2006; van der Voet *et*  
91 *al.* 2009), yet MPF activation is regulated somewhat differently than in *Xenopus*. For example,  
92 although the inhibitory Wee1/Myt1 kinase Wee-1.3 is crucially important for inhibiting MPF  
93 activity in immature *C. elegans* oocytes (Burrows *et al.* 2006), an apparent Greatwall homolog is  
94 not found in the *C. elegans* genome and  $\alpha$ -endosulfine/*ensa-1* is not required for viability or  
95 fertility (Kim *et al.* 2012). Likewise, the signal that triggers MPF activation for meiotic  
96 maturation in *C. elegans* is not progesterone, but rather the major sperm protein (MSP), an  
97 abundant cytoskeletal protein that is released from sperm (Miller *et al.* 2001; Kosinski *et al.*  
98 2005). The latter control mechanism, which serves to link meiotic maturation and ovulation to  
99 sperm availability, likely evolved in gonochoristic predecessors of facultative hermaphroditic  
100 nematode species like *C. elegans*. The rate of meiotic maturation declines substantially as a *C.*  
101 *elegans* hermaphrodite utilizes its limited supply of sperm for self-fertilization but rapidly  
102 increases upon mating (Kosinski *et al.* 2005). When sperm are absent, as in mutant  
103 hermaphrodites that do not produce sperm (e.g., *fog* mutant females), oocytes arrest for  
104 prolonged periods and the rate of production and growth of new oocytes declines until

105 insemination (McCarter *et al.* 1999; Wolke *et al.* 2007; Govindan *et al.* 2009). This serves to  
106 preserve metabolically costly oocytes when sperm are unavailable for fertilization. Thus, the  
107 molecular mechanisms that control MPF activation must be exquisitely fine-tuned for sperm  
108 sensing.

109         Another commonality between the *C. elegans* and *Xenopus* systems is that MPF  
110 activation depends on translational control mechanisms, though the details differ. In *C. elegans*,  
111 large ribonucleoprotein (RNP) complexes containing the tripartite motif (TRIM)-NHL (NCL-1,  
112 HT2A, and LIN-41) RNA-binding protein LIN-41 and the tristetraprolin/TIS11-related RNA-  
113 binding proteins OMA-1 and OMA-2 (referred to collectively as the OMA proteins) are major  
114 downstream targets of MSP signaling (Spike *et al.* 2014a,b; Tsukamoto *et al.* 2017). LIN-41 is the  
115 chief determinant of the extended meiotic prophase of *C. elegans* oocytes (Spike *et al.* 2014a).  
116 In *lin-41* null mutants, pachytene-stage oocytes cellularize prematurely, activate CDK-1,  
117 aberrantly disassemble the synaptonemal complex, and enter M phase precociously, causing  
118 sterility (Matsuura *et al.* 2016; Spike *et al.* 2014a; Tocchini *et al.* 2016). CDK-1 activation causes  
119 oocytes to prematurely transcribe and express genes that are ordinarily restricted to  
120 differentiated cells and expressed after the OET (Allen *et al.* 2014; Spike *et al.* 2014a; Tocchini  
121 *et al.* 2014). LIN-41 inhibits CDK-1 activation in part through the 3'-untranslated region (UTR)-  
122 mediated translational repression of the CDC-25.3 phosphatase (Spike *et al.* 2014a,b). By  
123 contrast, the OMA proteins are redundantly required for CDK-1 activation (Detwiler *et al.*  
124 2001). In the absence of the OMA proteins, oocytes fail to undergo meiotic maturation despite  
125 the presence of sperm, resulting in sterility (Detwiler *et al.* 2001).

126 Genetic analysis suggests the OMA proteins promote meiotic maturation by inhibiting  
127 the function of LIN-41 in the most proximal oocyte. Two lines of molecular evidence are  
128 consistent with the idea that LIN-41 must be inactivated to promote meiotic maturation. First,  
129 LIN-41 is degraded upon the onset of meiotic maturation in response to CDK-1 activation (Spike  
130 *et al.* 2014a; Figure 1, A and B). Second, LIN-41 is a potent translational repressor, yet several of  
131 the mRNAs it associates with and represses are translated and co-expressed with LIN-41 prior  
132 to meiotic maturation in the -1 and -2 oocytes (Tsukamoto *et al.* 2017). These mRNAs include  
133 those encoding the RNA-binding protein SPN-4, which is required for development of the  
134 embryonic germline and the mesendoderm (Gomes *et al.* 2001), and MEG-1, which is a  
135 germplasm or P granule component needed for germline development (Leacock and Reinke  
136 2008; Kapelle and Reinke 2011; Wang *et al.* 2014). By contrast, the OMA proteins are required  
137 for the translation of *spn-4* and *meg-1* transcripts in proximal oocytes, providing a molecular  
138 mechanism by which the OMA proteins might antagonize LIN-41 function (Tsukamoto *et al.*  
139 2017).

140 Here we examine the mechanism by which LIN-41 is eliminated by the end of the first  
141 meiotic division. We identify two LIN-41 degradation domains, Deg-A and Deg-B, and a  
142 potential CDK-1 phosphorylation site within Deg-A that are individually required for efficient  
143 degradation. Transplantation of both LIN-41 degradation domains into OMA-2 results in the  
144 premature degradation of the resulting fusion protein during meiosis. Furthermore, we find  
145 that a Skp, Cullin, F-box (SCF) E3 ubiquitin ligase complex containing the substrate recognition  
146 subunit SEL-10 promotes the degradation of LIN-41 and likely functions through the newly  
147 identified degradation domains of LIN-41. SEL-10 is a highly conserved F-box protein important



148 for cell-cycle regulation in both yeast (cell division control protein 4 (Cdc4)) and humans (F-box  
149 and WD repeat domain protein (FBW7)) (reviewed in Deshaies and Ferrell 2001; Welcker and  
150 Clurman 2008).

151 Intriguingly, we show that SEL-10 is also important for the degradation of the tumor  
152 suppressor protein GLD-1/STAR RNA-binding protein, which is required for oocyte  
153 differentiation and represses translation in oocytes (Francis *et al.* 1995a,b; Jones and Schedl  
154 1995; Lee and Schedl 2001; Shumacher *et al.* 2005; Wright *et al.* 2011; Jungkamp *et al.* 2011;  
155 Scheckel *et al.* 2012; Farley and Ryder 2012; Doh *et al.* 2013). GLD-1 was independently  
156 identified as a target of SEL-10-mediated degradation by Kisielnicka *et al.* (2018) along with  
157 CPB-3, a cytoplasmic polyadenylation element (CPE)-binding (CPEB) protein, which is also  
158 important for oocyte development (Boag *et al.* 2005; Hasegawa *et al.* 2006). GLD-1 and CPB-3  
159 are degraded during meiotic prophase, as immature oocytes transition from pachytene to  
160 diplotene (Kisielnicka *et al.* 2018), considerably earlier than the degradation of LIN-41 during  
161 the OET. This is likely due to differences in signaling-mediated regulation; while the degradation  
162 of LIN-41 is regulated by activated CDK-1 (Spike *et al.* 2014a and this work), the degradation of  
163 GLD-1 and CPB-3 is regulated by the MAP kinase MPK-1 (Kisielnicka *et al.* 2018 and this work).  
164 Surprisingly, the ectopic expression of LIN-41 and GLD-1 in *sel-10* mutants has only minor  
165 effects on fertility and the expression of mRNAs that are translationally repressed by either LIN-  
166 41 or GLD-1 during oogenesis. We suggest that the LIN-41 that persists in the embryos of *sel-10*  
167 and certain *lin-41* mutants is likely inactivated by additional post-transcriptional mechanisms  
168 that remain to be identified.

169

## MATERIALS AND METHODS

### 170 **Strains**

171 The genotypes of strains used in this study are reported in Table S1. The following mutations  
172 were used: LGI – *mex-3(tn1753[gfp::3xflag::mex-3])*, *air-2(or207ts)*, *unc-13(e1091)*, *rrf-*  
173 *1(pk1417)*, *gld-1(q485)*, *lin-41(tn1487ts)*, *lin-41(tn1541[gfp::tev::s-tag::lin-41]*, *lin-*  
174 *41(tn1541tn1548)*, *lin-41(tn1541tn1562)*, *lin-41(tn1541tn1571)*, *lin-41(tn1541tn1618)*, *lin-*  
175 *41(tn1541tn1620)*, *lin-41(tn1541tn1622)*, *lin-41(tn1541tn1628)*, *lin-41(tn1541tn1630)*, *lin-*  
176 *41(tn1541tn1635)*, *lin-41(tn1541tn1638)*, *lin-41(tn1541tn1641)*, *lin-41(tn1541tn1643)*, *lin-*  
177 *41(tn1541tn1645)*, *lin-41(tn1541tn1661)*, *lin-41(tn1541tn1663)*, *lin-41(tn1541tn1665)*, *lin-*  
178 *41(tn1541tn1668)*, *lin-41(tn1541tn1684)*, *lin-41(tn1541tn1775)*, *lin-41(tn1767)*, *fog-3(q470)*,  
179 and *lin-11(n566)*. LGIII – *mpk-1(ga111ts)*, *emb-30(tn377ts)*, *cdk-1(ne2257ts)*, *orc-*  
180 *1(tn1732[mng::3xflag::orc-1])* and *cul-2(or209ts)*. LGIV – *pgl-1(sam37[pgl-*  
181 *1R765S::mTagRFPT::3xflag])* (kindly provided by Dustin Updike), *cks-1(ne549ts)*, and *oma-*  
182 *1(zu405te33)*. LGV – *spn-4(tn1699[spn-4::gfp::3xflag])*, *oma-2(te51)*, *oma-*  
183 *2(cp145[mng::3xflag::oma-2])*, *oma-2(tn1760[mng::3xflag::degA::oma-2])*, *oma-*  
184 *2(tn1764[mng::3xflag::degA::degB::oma-2])*, *lon-3(e2175)*, *sel-10(ar41)*, *sel-10(ok1632)*, *sel-*  
185 *10(n1077)*, *him-5(e1490)*, and *fog-2(oz40)*. LGX – *meg-1(tn1724[gfp::3xflag::meg-1])*. The  
186 following rearrangements were used: *hT2[bli-4(e937) let-?(q782) qIs48]* (I; III) and *nT1[qIs51]*  
187 (IV; V). The following transgene insertions were used: *axIs1498[pie-1p::gfp::gld-1::gld-1 3'UTR,*  
188 *unc-119(+)]* (Merritt *et al.* 2008), *itIs37[pie-1p::mCherry::H2B::pie-1 3'UTR, unc-119(+)]* (McNally

189 *et al.* 2006), *ozls5[gld-1::gfp]* I (kindly provided by Tim Schedl), *ozls2[gld-1::gfp]* II (Schumacher  
190 *et al.* 2005), and *pwls116[rme-2p::rme-2::gfp::rme-2 3'UTR, unc-119(+)]* (Balklava *et al.* 2007).

191

## 192 **Genome editing**

193 Plasmids capable of expressing guide RNAs (gRNAs) that target the *lin-41* gene were generated  
194 as described by Arribere *et al.* (2014) from the vector pRB1017 and sequence-specific  
195 oligonucleotides. We estimated the efficiency with which each *lin-41* gRNA was able to target  
196 the *lin-41(tn1541)* locus by: (1) co-injecting a mixture of the gRNA plasmid (25 ng/μl), the  
197 pDD162 plasmid (Dickinson *et al.* 2013), which supplies the Cas9 enzyme (50 ng/μl), and a co-  
198 injection marker (*myo-2p::Tdtomato*, 4 ng/μl) into *lin-41(tn1541)* hermaphrodites, (2) culturing  
199 individual F1 progeny that expressed the co-injection marker (typically ≤10 F1s from each  
200 injected parent), and (3) determining the number of F1s that segregated F2 progeny with a Dpy  
201 *lin-41* loss-of-function (lf) phenotype. File S1 reports the sequences and estimated efficiencies  
202 of the gRNAs we used to generate the *lin-41* deletions and point mutations described in this  
203 work; most were relatively effective at targeting *lin-41*.

204 During the efficiency experiments for *lin-41* gRNAs #10 and #11, we identified *lin-*  
205 *41(tn1541tn1562)* and *lin-41(tn1541tn1571)*, respectively, as GFP::LIN-41-positive *lin-41(lf)*  
206 mutants that appeared to have relatively large deletions by PCR. All of the other deletions were  
207 generated in a targeted manner by co-injecting two or more *lin-41* gRNA plasmids (25 ng/μl  
208 each), a single-stranded oligonucleotide (ssODN) repair template (500 nM), the pDD162  
209 plasmid (50 ng/μl), and a co-injection marker (*myo-2p::Tdtomato*, 4 ng/μl) into *lin-41(tn1541)*

210 hermaphrodites. We used gRNAs on each side of the desired deletion that, in most cases,  
211 would not produce substrates for Cas9 digestion after the deletion event. Otherwise, silent  
212 mutations were included in the repair template to prevent re-cutting. To identify *lin-41(tn1541)*  
213 deletion mutants, we individually placed F1 worms expressing the co-injection marker on  
214 plates, allowed them to lay eggs, and then used PCR to screen pools of up to 6 F1 worms. Pools  
215 that appeared to be strongly positive for the desired deletion band were rescreened by PCR to  
216 identify F1 animals that had segregated candidate deletion mutants among their F2 progeny.  
217 Mutants were either allowed to become homozygous or were balanced using *hT2[bli-4(e937)*  
218 *let-?(q782) qIs48]* (I; III). Essentially the same method was used to generate amino acid  
219 substitutions in *lin-41*. However, in those experiments we used only one gRNA and repair  
220 events were identified using silent mutations that created restriction enzyme recognition sites  
221 in each repair template. Screening therefore consisted of PCR followed by a restriction enzyme  
222 digestion, and we only pooled 2 F1s in the initial round of screening so that the repair events  
223 would be easy to detect. All edited loci were validated by sequencing, and we were able to  
224 obtain multiple independent alleles for most targeted deletions and amino acid substitutions.  
225 Where possible, two alleles identical to the repair template (but derived from independently  
226 injected parents) were saved and assigned allele names. Other, typically imperfect, gene edits  
227 were also kept and given allele names if they were informative or potentially useful. Additional  
228 information about all of these alleles, as well as detailed genome editing information, including  
229 gRNA, repair template, and PCR primer sequences, is provided in File S1.

230 *oma-2 (tn1760)* and *oma-2(tn1764)* were created using the method described by  
231 Dickinson *et al.* (2015) to create *oma-2(cp145)*. Indeed, we were careful to replicate *oma-*

232 *2(cp145)* as closely as possible; we used the same gRNA plasmid (pDD223) and designed our  
233 repair templates to closely mimic pDD271, the repair template used to create *oma-2(cp145)*.  
234 However, instead of using PCR to generate the 3' homology arms of the repair templates, which  
235 contain sequences derived from both *oma-2* and *lin-41*, we synthesized these sequences as  
236 gBlocks (Integrated DNA Technologies, Skokie, IL). We minimized the size and complexity of  
237 each gBlock by removing introns from the *lin-41*-encoding sequences. *oma-2(tn1760)* and *oma-*  
238 *2(tn1764)* were perfect matches to the desired repairs (repair templates pCS557 and pCS561,  
239 respectively). Gene edited alleles were out-crossed to the wild type before analyzing fertility  
240 and embryonic lethality. Specific genome editing details are provided in File S1.

241

## 242 ***Microscopy***

243 Movies of GFP::LIN-41, mNG::Deg-A::Deg-B::OMA-2, PGL-1::RFP, and mCHERRY::H2B during the  
244 OET were obtained using a Marianas 200 Microscopy Workstation (Intelligent Imaging  
245 Innovations) built on an AxioObserver Z.1 stand (Carl Zeiss, Thornwood, NY) and driven by  
246 SlideBook 6.0 software (Intelligent Imaging Innovations, Denver, CO). The imaging was  
247 performed using a 40x oil Carl Zeiss Plan-Apochromat objective lens (numerical aperture of 1.4)  
248 and an Evolve electron-multiplying charge-coupled device camera (Photometrics, Tucson, AZ).  
249 The quantification of GFP::LIN-41 in proximal oocytes and embryos relative to distal oocytes  
250 was performed using ImageJ software. All of the other images were acquired on a Carl Zeiss  
251 motorized Axioplan 2 microscope with a 63X Plan-Apochromat (numerical aperture 1.4)  
252 objective lens using a AxioCam MRm camera and AxioVision software (Carl Zeiss). Image

253 quantifications were also performed using AxioVision, version 4.8.2.0. The average intensity of  
254 SPN-4::GFP fluorescence was measured in a  $\sim 12 \mu\text{M}$  diameter circle in the anterior cytoplasm  
255 of 1-cell and 2-cell embryos in order to avoid the bright puncta of SPN-4::GFP in the posterior;  
256 these are likely P granules, as SPN-4 is known to associate with these non-membrane-bound  
257 organelles in embryos (Ogura *et al.* 2003). The amount of diffusely cytoplasmic SPN-4::GFP  
258 appeared to be similar throughout the embryo during these early stages of embryogenesis and  
259 in each of the strains we analyzed. Likewise, the average intensity of GFP::MEX-3 and  
260 mNG::OMA-2 fluorescence was measured in a  $\sim 10 \mu\text{M}$  diameter circle in the oocyte cytoplasm.  
261 Fluorescence was measured in the oocytes that expressed detectable levels of each fusion  
262 protein under our imaging conditions (100 ms and 120 ms for GFP::MEX-3 and mNG::OMA-2,  
263 respectively) and were large enough to fit a  $\sim 10 \mu\text{M}$  diameter circle in the oocyte cytoplasm.  
264 GFP::MEX-3 was detected in 4 or 5 proximal oocytes in all strains, consistent with previous  
265 observations (Tsukamoto *et al.* 2017). mNG::OMA-2 was detected in 5 or 6 proximal oocytes in  
266 the *sel-10(ar41)* mutants and in 7 or more proximal oocytes in the control strain.

267

## 268 ***RNA interference***

269 Gene-specific RNA interference (RNAi) was performed by feeding *C. elegans* with double-  
270 stranded RNA (dsRNA)-expressing *E. coli* (Timmons and Fire 1998) at 22<sup>o</sup> using the RNAi culture  
271 media described by Govindan *et al.* (2006). RNAi clones were obtained from Source BioScience  
272 (Nottingham, UK), and the identity of each RNAi clone verified by DNA sequencing. The RNAi  
273 clone used for *cul-2(RNAi)* targets the *cul-2* 3'UTR, which may make it less effective at triggering

274 an RNAi response. Exposure to dsRNA-expressing *E. coli* was initiated during the fourth larval  
275 stage and GFP::LIN-41 was examined after 1 and 2 days. *cdk-1(RNAi)*, *skr-1(RNAi)* and *sel-*  
276 *10(RNAi)* at least partially prevented the elimination of GFP::LIN-41 after 1 day, with stronger  
277 and more penetrant phenotypic effects on Day 2, while *cul-1(RNAi)* only prevented the  
278 elimination of GFP::LIN-41 after 2 days of RNAi treatment. All images of RNAi-treated animals  
279 were collected on Day 2.

280

### 281 **Western blots**

282 Proteins were separated using NuPage 4–12% Bis-Tris gels or 3-8% Tris-Acetate gels (Invitrogen,  
283 Carlsbad, CA) and visualized after western blotting. Blots were blocked with 5% nonfat dried  
284 milk. Primary antibodies used to detect proteins were affinity-purified rabbit anti-LIN-41 R214  
285 (1:20,000 dilution) (Spike *et al.* 2014a), guinea pig anti-LIN-41 GP49E (1:4,000 dilution) (Spike *et*  
286 *al.* 2014a), and rabbit anti-GLD-1 (1:3,000 dilution; kindly provided by Sarah Crittenden and  
287 Judith Kimble) (Jan *et al.* 1999). Secondary antibodies used for western blots were peroxidase-  
288 conjugated donkey anti-guinea pig (1:40,000 dilution) (Jackson ImmunoResearch, West Grove,  
289 PA) and anti-rabbit (1:5,000 dilution) (Thermo Scientific, Waltham, MA) antibodies. Detection  
290 was performed using SuperSignal West Femto Maximum Sensitivity Substrate (Thermo  
291 Scientific).

292

293

294 ***Antibody staining***

295 Dissected gonads stained with either the rabbit anti-phospho-histone H3 (Ser10) antibody  
296 (1:400 dilution; Millipore, Burlington, MA) or the rabbit anti-RME-2 antibody (1:50 dilution,  
297 kindly provided by Barth Grant) (Grant and Hirsh 1999) were fixed in 3% paraformaldehyde for  
298 1 hour, as described (Rose *et al.* 1997). Dissected gonads stained with the rabbit anti-GLD-1  
299 primary antibody (1:150 dilution; Jan *et al.* 1999) were fixed in 1% paraformaldehyde for 10  
300 minutes. Primary antibodies were detected using either Cy3-conjugated goat anti-rabbit or  
301 Alexa 488-conjugated donkey anti-rabbit secondary antibodies (1:500 dilutions; Jackson  
302 ImmunoResearch).

303

304 ***Data availability***

305 All strains and newly-created alleles (see Table S1 and File S1) are available upon request. The  
306 sequences of gRNAs, repair templates, PCR primers, *lin-41* alleles, and *oma-2* alleles are  
307 presented in File S1. Plasmids producing gRNAs and those containing repair templates for  
308 genome editing are available upon request. All Sanger sequencing files are available upon  
309 request. Supplemental materials are available at Figshare: <https://doi.org/>.

310



311  
312  
313  
314  
315  
316  
317  
318  
319  
320  
321  
322  
323  
324  
325  
326  
327  
328  
329  
330  
331

## RESULTS

### ***GFP::LIN-41 is eliminated during the first meiotic division***

Germline-expressed LIN-41 is restricted to oogenesis and required to prevent premature M-phase entry and to promote growth of developing oocytes (Spike *et al.* 2014a). In the oogenic germlines of adult hermaphrodites, LIN-41 is expressed from mid-pachytene through subsequent stages of oocyte development, with a notable reduction in LIN-41 levels as oocytes initiate meiotic maturation at the end of oogenesis. Essentially the same pattern is seen in the oocytes of *lin-41(tn1541[gfp::tev::s-tag::lin-41])* adult hermaphrodites; these animals carry a *gfp*-tagged allele of *lin-41* and express only GFP-tagged LIN-41 (GFP::LIN-41), yet have essentially wild-type oocyte development and fertility (Figure 1, A and B; Spike *et al.* 2014a). GFP::LIN-41 is always visible in the oocyte immediately adjacent to the spermatheca (–1 oocyte), but is not detectable in most embryos, suggesting that GFP::LIN-41 is eliminated soon after meiotic maturation and ovulation (Figure 1, A and B; Spike *et al.* 2014a). To more precisely determine the stage at which GFP::LIN-41 is eliminated during the OET, we used time-lapse imaging to examine GFP::LIN-41 as oocytes proceed through meiotic maturation, are ovulated into and fertilized in the spermatheca, and complete their meiotic divisions (Movie S1 and Figure 1, C–H). These images show that GFP::LIN-41 levels drop dramatically after meiotic maturation and ovulation (Figure 1, D and H) and that GFP::LIN-41 is essentially undetectable well before the end of the first meiotic division (Figure 1, F and G). We were able to image several oocytes as they moved into the –1 oocyte position from a slightly earlier developmental stage (–2 or –3 oocyte start position) and completed meiosis. Quantification of GFP::LIN-41

332 levels in these oocytes revealed that GFP::LIN-41 levels also decline during the late stages of  
333 oogenesis, albeit in a somewhat less-dramatic fashion than after meiotic maturation (Figure  
334 1H). During meiotic maturation, the oocyte undergoes a cortical cytoskeletal rearrangement  
335 prior to ovulation (McCarter *et al.* 1999). During cortical rearrangement, we observed that  
336 GFP::LIN-41 began to localize to punctate structures in the oocyte cytoplasm coincident with  
337 the onset of its dramatic disappearance (Movie S1). The nature of these punctate structures is  
338 unclear; however, they do not appear to be P granules as most of them do not exhibit  
339 colocalization with PGL-1::RFP (Figure S1, A–C).

340

#### 341 ***Deg-A and Deg-B are required to eliminate GFP::LIN-41 from embryos***

342 To identify the amino acid sequences of LIN-41 required for its elimination from early embryos,  
343 we generated a series of deletions in the coding region of the GFP::LIN-41-expressing *lin-*  
344 *41(tn1541)* gene using CRISPR-Cas9-based genome editing approaches (see Materials and  
345 Methods and File S1 for details). Collectively, these deletions are predicted to remove 95% of  
346 the LIN-41 protein and disrupt all known structural domains of LIN-41 (Figure 2, A and B, and  
347 File S1). For each mutant, GFP::LIN-41[ $\Delta$ ] expression was examined to determine whether the  
348 deleted portion of LIN-41 is necessary for the elimination of GFP::LIN-41 from embryos (Figure  
349 2, D–F, Figure S2, and Figure S3). Null mutations in *lin-41* are sterile, with small, abnormal  
350 oocytes, and some hypomorphic alleles of *lin-41* affect the production of high-quality oocytes  
351 (Slack *et al.* 2000; Spike *et al.* 2014a). Thus, GFP::LIN-41[ $\Delta$ ] was often examined in both  
352 heterozygotes (*lin-41(tn1541 $\Delta$ )/unc-13(e1091) lin-11(n566)* genotypes) and homozygotes (*lin-*

353 *41(tn1541Δ)* genotypes), particularly when the *lin-41(tn1541Δ)* homozygotes produced  
354 obviously small or abnormal oocytes or produced a significant number of dead embryos (Figure  
355 S2, Figure S3, and Table 1). This approach enabled us to determine that two non-overlapping  
356 regions in the N-terminal third of LIN-41 are required for the elimination of LIN-41 from  
357 embryos (Figure 2B). We will refer to these regions as the LIN-41 degradation domains Deg-A  
358 and Deg-B.

359         The LIN-41 Deg-A domain is defined by the *lin-41(tn1541tn1638)* deletion allele. This  
360 deletion is predicted to affect GFP::LIN-41 by removing 73 amino acids on the N-terminal side  
361 of the LIN-41 RING domain (Figure 2C and File S1). *lin-41(tn1541tn1638)* is immediately  
362 adjacent to, but does not overlap, the *lin-41(tn1541tn1630)* deletion, which is predicted to  
363 affect GFP::LIN-41 by removing the LIN-41 RING finger domain (see File S1 for deleted residues).  
364 Consistent with previous amino acid substitution and transgenic rescue data (Tocchini *et al.*  
365 2014), the RING domain is not required for the elimination of GFP::LIN-41 from embryos (Figure  
366 2E and Figure S2). The LIN-41 Deg-B domain is defined by two contiguous, but non-overlapping,  
367 deletions on the C-terminal side of the LIN-41 RING domain. The *lin-41(tn1541tn1635)* deletion  
368 is predicted to affect GFP::LIN-41 by removing 44 amino acids on the C-terminal side of the LIN-  
369 41 RING domain (Deg-B1) (Figure 2C and File S1). Compared to the Deg-A deletion mutant (*lin-*  
370 *41(tn1541tn1638)*), the Deg-B1 deletion mutant (*lin-41(tn1541tn1635)*) has a relatively low but  
371 detectable level of GFP::LIN-41[Δ] in early embryos (compare Figure S2, K and M). However, the  
372 *lin-41(tn1541tn1622)* deletion, which defines Deg-B2, and the remaining 151 amino acids of  
373 Deg-B (Figure 2C and File S1), has a robust defect in the elimination of GFP::LIN-41[Δ] from  
374 early embryos that is apparent in both heterozygous and homozygous deletion mutants (Figure

375 S2, E and G). Finally, deletions predicted to affect GFP::LIN-41 by removing amino acids and  
376 structural domains C-terminal to Deg-B were able to eliminate GFP::LIN-41[Δ] from early  
377 embryos (Figure 2A and Figure S3). Interestingly, we found that C-terminal domains could only  
378 be removed individually or in small groups, as GFP::LIN-41[Δ] was not detectable when a  
379 majority of the C-terminus was removed (*lin-41(tn1541tn1628)* deletion; Figure 2A and Figure  
380 S3, M–P).

381

### 382 ***LIN-41[T83] is required to eliminate LIN-41 from embryos***

383 The results described above indicate that the elimination of GFP::LIN-41 does not depend on  
384 any of the previously described structural domains of LIN-41, but instead requires two new  
385 regulatory domains. Analysis of the amino acid sequences of Deg-A and Deg-B shows that each  
386 regulatory domain contains many possible phosphorylation sites (Figure 2C). Previously  
387 published results indicate that the elimination of GFP::LIN-41 from embryos also requires CDK-1  
388 (Spike *et al.* 2014a), a highly conserved proline-directed serine/threonine kinase essential for  
389 M-phase entry during oocyte meiotic maturation in *C. elegans* (Boxem *et al.* 1999). Thus, we  
390 hypothesized that LIN-41 might be a direct target of CDK-1 activity, and that phosphorylation of  
391 either Deg-A or Deg-B by CDK-1 could be sufficient to trigger the elimination of GFP::LIN-41  
392 from embryos. 18 minimal CDK-1 consensus sequences ([S/T]P) are present in Deg-A and Deg-B  
393 (Figure 2C), but only a single site, found in Deg-B1, conforms to an expanded CDK1 consensus  
394 sequence ([S/T]PX[K/R]) (Ubersax *et al.* 2003). However, changing the potentially

395 phosphorylated residue at this site to an alanine (S176A; e.g.: *lin-41(tn1541tn1641)*) had no  
396 effect on the elimination of GFP::LIN-41 from embryos (Figure 2C and Figure S4A).

397 We therefore shifted our focus to Deg-A, which is relatively small and contains only  
398 three potential CDK-1 target sites, but strongly prevents the elimination of GFP::LIN-41 from  
399 embryos (Figure S2M). Each site in Deg-A was tested individually to see if it is required for the  
400 elimination of GFP::LIN-41 from embryos. Although the mutations S57A and S90A (e.g.: *lin-*  
401 *41(tn1541tn1663)* and *lin-41(tn1541tn1661)*, respectively) had no discernable effect (Figure S4,  
402 C and E), the T83A mutation (e.g.: *lin-41(tn1541tn1645)*) strongly prevented the elimination of  
403 GFP::LIN-41 from embryos, similar to the Deg-A deletion mutant (Figure 2G, Figure S2M, and  
404 Figure S4G). Time-lapse imaging of oocyte meiotic maturation, ovulation, and fertilization  
405 documents that the T83A mutation strongly abrogates the elimination of GFP::LIN-41 (Movie  
406 S2). During cortical rearrangement, GFP::LIN-41[T83A] localized partially to dynamic punctate  
407 structures like GFP::LIN-41 (compare Movie S1 and Movie S2); however unlike the wild-type  
408 protein, puncta of GFP::LIN-41[T83A] were also observed during the meiotic divisions.  
409 Furthermore, GFP::LIN-41[T83A] persisted through multiple embryonic cleavage divisions and  
410 became at least partially associated with P granules by the 2-cell stage (Movie S2 and Figure S1,  
411 D–I). These results are consistent with the possibility that phosphorylation of LIN-41 by a  
412 proline-directed S/T kinase, such as CDK-1, promotes the rapid elimination of GFP::LIN-41 upon  
413 the onset of meiotic maturation. As a further assessment, we replaced T83 with a glutamic acid  
414 residue (T83E) (e.g.: *lin-41(tn1541tn1684)*), which is negatively charged and might function as a  
415 phosphomimetic. However, T83E did not result in the premature elimination of GFP::LIN-41, as  
416 when CDK-1 is prematurely activated (Spike *et al.* 2014a). Instead, T83E prevented the

417 elimination of GFP::LIN-41 from embryos, similar to T83A (Figure S4, G and I). Thus, we  
418 conclude that either T83E does not effectively mimic phosphorylation at this particular site or  
419 T83 might not be phosphorylated. In fact, phosphorylation sites that function to recruit adapter  
420 proteins are often not recognized by binding partners after phosphomimetic substitution  
421 (Dephoure *et al.* 2013), and this is a possible explanation for the function of T83 and the Deg  
422 domains of LIN-41, as we will describe.

423           A requirement for the extreme N-terminus of LIN-41 (amino acids 1–39) with respect to  
424 the elimination of GFP::LIN-41 was not examined in the *lin-41(tn1541)* deletion analysis.  
425 Genetic analysis suggests that this region of LIN-41 is important for down-regulating *lin-41*  
426 function specifically in the male tail (Del Rio-Albrechtsen *et al.* 2006). Gain-of-function (gf)  
427 alleles that affect this part of LIN-41 have a defect in male tail tip retraction, while  
428 hermaphrodites appear overtly wild-type. *lin-41(tn1541)* males also have a male tail tip  
429 retraction defect (Figure S5, A and B), suggesting that the GFP tag on the N-terminus of LIN-41  
430 disrupts this male-specific function. Furthermore, the amino acid change found in the *lin-*  
431 *41(bx37gf)* allele (G35R) does not affect the elimination of GFP::LIN-41 from early embryos (*lin-*  
432 *41(tn1541tn1665)*; Figure S5, C and E). For these reasons, we suspect that the extreme N-  
433 terminus of LIN-41 is unlikely to be involved in the elimination of GFP::LIN-41 from early  
434 embryos. One possibility, however, might be that the N-terminal GFP tag on GFP::LIN-41  
435 compromises a function that is required redundantly with Deg-A or Deg-B. To explore this  
436 possibility, we generated worms expressing LIN-41[T83A] (*lin-41(tn1767)*) and asked whether  
437 the untagged protein also persists in embryos. Using western blots, we found that LIN-41 was  
438 undetectable in a lysate made from wild-type embryos, but that LIN-41[T83A] was clearly

439 present in a lysate prepared from *lin-41(tn1767)* mutant embryos (Figure S6C). Thus, the T83A  
440 mutation abrogates the elimination of both LIN-41 and GFP::LIN-41 from embryos.

441

#### 442 ***Functional requirements for individual LIN-41 domains***

443 LIN-41 is a large protein with two well-defined domains that are proposed to have strikingly  
444 different activities. The first of these is actually a multi-domain grouping called a TRIMpartite  
445 Motif (TRIM) that contains RING, B-box, and coiled-coil (CC) domains; many TRIM proteins are  
446 thought to function as RING finger E3 ubiquitin ligases (Ikeda and Inoue 2012). The second  
447 functional domain is an RNA-binding domain composed of 6 NHL (NCL-1, HT2A and LIN-41)  
448 repeats at the C-terminus of LIN-41 (Slack and Ruvkun 1998; Loedige *et al.* 2015; Kumari *et al.*  
449 2018). Forward and reverse genetic analyses strongly indicate that the NHL domain is important  
450 for both the germline and somatic functions of *C. elegans* LIN-41 (Slack *et al.* 2000; Spike *et al.*  
451 2014a; Tocchini *et al.* 2014), consistent with the identification of LIN-41 as a translational  
452 repressor in both tissue types (Spike *et al.* 2014b; Aeschimann *et al.* 2017; Tsukamoto *et al.*  
453 2017). By contrast, a deletion of the entire LIN-41 RING domain (Figure 2A), which confers *in*  
454 *vitro* E3 ligase catalytic activity to mouse LIN41 and other TRIM proteins (Rybak *et al.* 2009;  
455 Esposito *et al.* 2017), results in appreciable fertility (brood size of  $210 \pm 87$ ; Table 1) and thus is  
456 non-essential for *C. elegans* oogenesis. As described below, the phenotypes seen in *lin-*  
457 *41(tn1541)* deletion mutants are consistent with prior observations and provide additional  
458 insights into the functions of LIN-41 protein domains.

459 **TRIM (Ring, B-box, CC) domain:** Deletion of the RING finger in the context of GFP::LIN-41  
460 (GFP::LIN-41[ $\Delta$ RING]) results in only mild defects. Most *lin-41(tn1541tn1630)* animals are fertile  
461 and have a large number of progeny; no strong defects in oogenesis, embryonic development  
462 or body shape are evident (Table 1 and Figure S2, I and J). We did note, however, that *lin-*  
463 *41(tn1541tn1630)* animals appear to be slightly sick and that they produce ~33% fewer progeny  
464 than *lin-41(tn1541)* hermaphrodites (Table 1). Interestingly, deletion of the other two TRIM  
465 sub-domains (GFP::LIN-41[ $\Delta$ Bbox-CC]) causes a much stronger reduction in LIN-41 function.  
466 Most (84%) *lin-41(tn1541tn1562)* hermaphrodites are fertile, but produce very few progeny (6  
467  $\pm$  4) and have obvious defects in oogenesis as well as a Dumpy (Dpy) body shape (Table 1;  
468 Figure S3, A and B). Thus, *lin-41(tn1541tn1562)* is clearly a hypomorphic allele of *lin-41* that  
469 affects both its germline and somatic functions.

470 We note that *lin-41(tn1541tn1562)* might remove additional residues beyond the Bbox-  
471 CC region because, unlike the other *lin-41(tn1541 $\Delta$ )* mutants we created, *lin-41(tn1541tn1562)*  
472 is not a precise exon-exon fusion and requires a new in-frame splicing event to make a full-  
473 length protein (Figure 2A and File S1). However, the deletion in this mutant was accompanied  
474 by the insertion of a small sequence that includes two potential 5' splice site consensus  
475 sequences; both are in-frame with the downstream exon. Furthermore, the relative size of  
476 GFP::LIN-41[ $\Delta$ Bbox-BBC] on SDS-PAGE western blots is consistent with what we expect to see  
477 for the protein made by this particular deletion mutant (File S1 and Figure S6B). This is also true  
478 for the other GFP::LIN-41[ $\Delta$ ] proteins we detected on western blots using anti-LIN-41  
479 antibodies (Figure S6, A and B).



480 **IG/filamin domain:** IG/filamin (IG) domains are only found in a subset of TRIM-NHL proteins;  
481 structural analysis of this part of *C. elegans* LIN-41 suggests that it forms a classic IG-like domain  
482 fold (Tocchini *et al.* 2014). The IG domain has been proposed to function, along with the coiled-  
483 coil domain, as a binding platform for proteins that repress the translation of NHL-bound target  
484 mRNAs (Loedige *et al.* 2013). *lin-41(ma104)* is a hypomorphic allele that likely disrupts the  
485 structure and function of the LIN-41 IG domain (Tocchini *et al.* 2014). As previously reported  
486 (Spike *et al.* 2014b), outcrossed *lin-41(ma104)* mutant hermaphrodites have mild oocyte  
487 defects and a reduced, but still substantial, brood size of 181 progeny (n=12). Deletion of the IG  
488 domain in the context of GFP::LIN-41 (GFP::LIN-41[ $\Delta$ IG]) results in stronger defects. Most *lin-*  
489 *41(tn1541tn1571)* hermaphrodites are fertile, with a very low brood size (11 progeny) and  
490 obvious defects in oogenesis (Table 1 and Figure S3, C and D). Both alleles also result in worms  
491 with an obviously Dpy body shape. Thus, despite the difference in brood size, the alleles that  
492 affect the IG domain are hypomorphic and reduce both the germline and somatic functions of  
493 *lin-41*. Indeed, it is potentially misleading to conclude that the relative severities of *lin-*  
494 *41(ma104)* and *lin-41(tn1541tn1571)* are meaningful, as LIN-41 function may be slightly  
495 compromised in the *lin-41(tn1541)* mutant despite its wild-type brood size ( $316 \pm 39$ ; Table 1;  
496 Spike *et al.* 2014a). For example, the introduction of the LIN-41[D1125N] amino acid change  
497 that results in a temperature-sensitive (ts) phenotype in an otherwise wild-type LIN-41 protein  
498 (e.g.: *lin-41(tn1487(ts))*; 100% fertile at 15°C (n=224), average brood size of 104 (n=64); Spike *et*  
499 *al.* 2014a) results in a stronger, but still hypomorphic, phenotype in a GFP::LIN-41 mutant  
500 background (e.g.: *lin-41(tn1541tn1548)*; 71% fertile at 15°C (n=21), average brood size of 3  
501 (n=15)).

502 **The NHL domain:** Deletion of the C-terminal NHL domain in the context of GFP::LIN-41  
503 (GFP::LIN-41[ΔNHL]) results in a strong loss-of-function *lin-41* phenotype. Whereas *lin-*  
504 *41(tn1541)* hermaphrodites are fertile, with normal oocyte development and overall  
505 appearance, nearly all (98.5%) *lin-41(tn1541tn1618)* hermaphrodites are sterile and have a Dpy  
506 body shape (Table 1). Oogenesis is extremely abnormal in most animals (Figure S3, G and H),  
507 although *lin-41(tn1541tn1618)* hermaphrodites appear capable of producing embryos on  
508 occasion (Table 1 and Figure S3, I and J). The fact that deletion of the LIN-41 NHL domain does  
509 not result in 100% sterility is surprising because the *lin-41(n2914)* null mutation has never been  
510 observed to produce progeny. Thus, LIN-41 can exhibit some, albeit very low, biological  
511 function in the absence of the NHL domain. We suggest, that this low-level function may be  
512 mediated through components of the LIN-41 RNP (Spike *et al.* 2014b; Tsukamoto *et al.* 2017).  
513 We confirmed that CDK-1 exhibits premature activation in post-dauer *lin-41(tn1541tn1618)*  
514 mutants, as it does in *lin-41(n2914)* null mutants, by staining adult hermaphrodite germlines  
515 with an antibody specific to histone H3 phosphorylated on Serine 10 (pH3(S10)). This antibody  
516 stains the nucleoplasm and condensed chromosomes of wild-type diakinesis-stage oocytes as  
517 they prepare enter M-phase near the spermatheca (Hsu *et al.* 2000). Both M-phase and anti-  
518 pH3(S10) staining occur prematurely in strong loss-of-function *lin-41* mutants and are *cdk-1-*  
519 dependent (Spike *et al.* 2014a). As expected for a strong loss-of-function mutant, and  
520 consistent with the idea that premature M-phase entry and CDK-1 activation occur  
521 prematurely, we detected pH3(S10)-positive condensed chromosomes in or near the loop  
522 region of the gonad, and just after the end of pachytene, in most *lin-41(tn1541tn1618)* oogenic  
523 germlines (n=6/9). Interestingly, GFP::LIN-41[ΔNHL] forms abnormal aggregates in the oocytes

524 of *lin-41(tn1541tn1618)* homozygotes; these aggregates are not seen in heterozygotes (Figure  
525 S3, G, I, and K). The reason for this aberrant pattern of localization is unknown, but GFP::LIN-  
526 41[ $\Delta$ NHL] aggregation is also seen in post-dauer *lin-41(tn1541tn1618); cdk-1(RNAi)* animals  
527 (n=32), and therefore does not depend on the dysregulation of *cdk-1* function that occurs  
528 during oogenesis in strong loss-of-function *lin-41* mutants (Spike *et al.* 2014a). These aggregates  
529 may reflect abnormal biogenesis of LIN-41 RNPs in the absence of the NHL domain.

530 ***Meiotic degradation domains are nonessential:*** We initially hypothesized that the deletion of  
531 LIN-41 degradation domains might result in a gain-of-function phenotype that would impact  
532 fertility or embryonic viability. However, *lin-41(tn1541tn1643)*, a large deletion that removes  
533 Deg-A, the RING finger, and Deg-B in the context of GFP::LIN-41, behaves as a recessive  
534 hypomorph that preferentially affects germline function. Homozygous mutants do not have a  
535 strong Dpy phenotype, but do have an extremely small brood size and display obvious defects  
536 in oogenesis and embryogenesis (Table 1 and Figure S2, O and P). In contrast, heterozygous *lin-*  
537 *41(tn1541tn1643)* mutants appear essentially normal (n=20). This is also true for deletions that  
538 subdivide the large N-terminal region of LIN-41, such as *lin-41(tn1541tn1620)* and *lin-*  
539 *41(tn1541tn1622)* (Table 1 and Figure S2, A–H). Indeed, even when homozygous, the relatively  
540 small Deg-A deletion (*lin-41(tn1541tn1638)*), which results in abundant GFP::LIN-41[ $\Delta$ Deg-A] in  
541 early embryos, appears to have minimal consequences for GFP::LIN-41 function at 20° (Table 1  
542 and Figure S2, M and N). Likewise, animals expressing LIN-41[T83] and GFP::LIN-41[T83] appear  
543 essentially wild-type; the latter have only a slightly reduced brood size relative to GFP::LIN-41-  
544 expressing controls (Table 1 and Figure S4, G and H). Consequently, we decided to look carefully  
545 at the ovulation rates of the minimally affected LIN-41 Deg-A deletion (*lin-41(tn1541tn1638)*)

546 and T83A point mutants (*lin-41(tn1541tn1645)* and *lin-41(tn1767)*). Oocyte meiotic maturation  
547 is a rate-limiting step for hermaphrodite fertility and the ovulation rate approximates the rate  
548 of oocyte meiotic maturation (McCarter *et al.* 1999; Miller *et al.* 2001, Govindan *et al.* 2006).  
549 Importantly, several aspects of nuclear and cytoplasmic oocyte maturation occur prematurely  
550 in *lin-41(lf)* mutations (Spike *et al.* 2014a,b; Tsukamoto *et al.* 2017). Deg-A domain mutants  
551 exhibit mean ovulation rates that are significantly reduced relative to genotype-matched  
552 controls (Figure 2H). Interestingly, the mean ovulation rate of the *lin-41(tn1541)* control strain  
553 was elevated relative to wild-type animals (Figure 2H, 3.4 vs 2.9 ovulations/gonad arm/hr).  
554 Together, these observations suggest that (1) *lin-41(tn1541)* might be a weak hypomorph that  
555 causes a slight increase in the oocyte maturation rate and (2) Deg-A domain mutants cause the  
556 opposite phenotype, a reduced oocyte maturation rate. These changes in the rate of oocyte  
557 maturation are relatively modest, however, and our phenotypic analyses generally suggest that  
558 the elimination of LIN-41 from early embryos is not a critical control point for regulating LIN-41  
559 function or activity levels *in vivo*.

560

### 561 ***LIN-41[Deg] domains are sufficient for degradation***

562 OMA-1 and OMA-2 (OMA-1/2) are functionally redundant cytoplasmic RNA binding proteins  
563 expressed in oocytes and early embryos (Detwiler *et al.* 2001) that co-purify with LIN-41 RNP  
564 complexes (Spike *et al.* 2014b, Tsukamoto *et al.* 2017). OMA-1/2 levels remain high in 1-cell  
565 embryos until the first mitotic division, when they are rapidly degraded (Lin 2003; Nishi and Lin  
566 2005; Shirayama *et al.* 2006; Stitzel *et al.* 2006). The expression and subsequent elimination of

567 OMA-2 can be easily visualized in *oma-2(cp145)* mutants (Dickinson *et al.* 2015; Figure 3A and  
568 Figure S7, A and B), which express an mNeonGreen-tagged form of OMA-2 that is largely  
569 functional *in vivo* (Table 2, compare *oma-1(zu405te33); oma-2(cp145)* to *oma-1(zu405te33);*  
570 *oma-2(te51)* and *oma-1(zu405te33)*). Based on these attributes, we decided to test whether  
571 the LIN-41 Deg domains are sufficient to induce the premature degradation of mNG::OMA-2  
572 during meiosis. Molecularly, we chose to place LIN-41 DEG domains between mNeonGreen and  
573 OMA-2 (Figure 3, A–C), as this is similar to their locations in GFP::LIN-41 (Figure 2, A and B) and  
574 no structural (e.g., X-ray crystallographic) data are available to aid the experimental design.  
575 Using the same method that Dickinson *et al.* (2015) used to make *oma-2(cp145)*, we created  
576 two new *oma-2* alleles that also contain *lin-41*-encoded Deg domains and examined the pattern  
577 of mNG::DEG::OMA-2 accumulation prior to the first mitotic division (Figure 3 and Figure S7).

578 We began by testing LIN-41 Deg-A, which contains the possible CDK-1 target site (T83)  
579 required for the elimination of LIN-41. *oma-2(tn1760)* mutants express mNG::Deg-A::OMA-2 in  
580 oocytes and 1-cell embryos. Similar to mNG::OMA-2, this protein is present in 1-cell embryos  
581 just prior to the first mitotic division but eliminated from older embryos (Figure 3, D and E, and  
582 Figure S7, A, B, E, and F). Indeed, the only obvious difference was the amount of mNG in older  
583 1-cell pronuclear stage embryos, which was significantly reduced in *oma-2(tn1760)* embryos  
584 compared to *oma-2(cp145)* controls (compare Figure 3, D and E, and Figure S8A). This reduction  
585 might be caused by Deg-A-mediated destabilization of the mNG::OMA-2 fusion protein (see  
586 below), but is not equivalent to the rapid elimination of GFP::LIN-41 that occurs in meiosis I  
587 (Movie S1 and Figure 1). Because Deg-A on its own was not sufficient to trigger the rapid  
588 elimination of mNG::OMA-2 in 1-cell embryos, we tested LIN-41 Deg-A and Deg-B together.

589 *oma-2(tn1764)* mutants express mNG::Deg-A, Deg-B::OMA-2 in oocytes, but in 1-cell embryos  
590 the amount of mNG is substantially reduced or absent (Figure 3F and Figure S7, G and I). To  
591 more precisely determine the stage at which mNG::DEG-A, Deg-B::OMA-2 is eliminated, we  
592 used time-lapse imaging (Movie S3 and Figure 3, L–O). Levels of this fusion protein drop  
593 somewhat during the first meiotic division (Figure 3, M and N) and become essentially  
594 undetectable before the end of the second meiotic division (Figure 3O). We conclude that Deg-  
595 A and Deg-B are sufficient in combination to trigger the rapid degradation of mNG::OMA-2  
596 during meiosis, although this event is temporally delayed relative to GFP::LIN-41 (Figure 3P).

597 *oma-1* and *oma-2* share redundant functions during both oocyte and early embryo  
598 development (Detwiler *et al.* 2001; Guven-Ozkan *et al.* 2008). Double mutants carrying strong  
599 loss-of-function alleles (e.g., *oma-1(zu405te33); oma-2(te51)*) are sterile with a defect in  
600 meiotic maturation (Detwiler *et al.* 2001; Table 1). For the most part, the embryonic functions  
601 of *oma-1/2* have been studied using conditions that reduce, but do not eliminate, OMA-1/2  
602 function in embryos, such as double RNA interference (RNAi) or reduction-of-function alleles  
603 that are incompletely sterile (Nishi and Lin 2005; Guven-Ozkan *et al.* 2008). In *oma-*  
604 *1(zu405te33); oma-2(tn1764)* double mutants, OMA-2 is expressed during oogenesis but  
605 eliminated prematurely from embryos. Consequently, these double mutants are very fertile but  
606 produce progeny that die during embryogenesis (Table 2). Thus, as a novel allele that  
607 specifically reduces embryonic OMA-2, *oma-2(tn1764)* may be useful for studying the  
608 embryonic functions of *oma-1/2*. Our initial observations indicate that young *oma-*  
609 *1(zu405te33); oma-2(tn1764)* embryos exhibit cell division defects and ectopic cleavage furrows  
610 (Figure S8B); similar defects have been reported after *oma-1/2(RNAi)* depletion (Li *et al.* 2009).

611           When combined with *oma-1(zu405te33)*, *oma-2(tn1764)* exhibits a stronger embryonic  
612 phenotype than either *oma-2(cp145)* or *oma-2(tn1760)*. However, the severity of the *oma-*  
613 *1(te33zu405); oma-2(tn1760)* double mutant phenotype relative to *oma-1(te33zu405); oma-*  
614 *2(cp145)* was somewhat surprising (Table 2; 60 vs. 12% embryonic lethality). One possibility for  
615 the stronger embryonic phenotype might be the reduction in mNG::Deg-A::OMA-2 levels  
616 observed in *oma-2(tn1760)* pronuclear-stage embryos (Figure 3E and Figure S8A). We examined  
617 this more closely by crossing each mNG-tagged *oma-2* allele into an *emb-30(tn377ts)* mutant  
618 background. *emb-30* encodes a subunit of the Anaphase Promoting Complex (APC), and adult  
619 *emb-30(tn377ts)* hermaphrodites upshifted to restrictive temperature (25°C) produce 1-cell  
620 embryos that arrest in metaphase of the first meiotic division (Furuta *et al.* 2000). Arrest in  
621 meiotic metaphase does not prevent or delay the elimination of GFP::LIN-41, which is  
622 independent of APC function (Spike *et al.* 2014a). We observed that mNG::OMA-2 is turned  
623 over in arrested meiotic embryos, but could typically be seen in 4 embryos in the uterus of  
624 *emb-30(tn377ts); oma-2(cp145)* hermaphrodites after a 5–7 hour upshift to 25°C (Figure S8C).  
625 In contrast, both of the LIN-41 Deg domain-containing OMA-2 proteins appeared to be less  
626 stable under the same conditions. mNG::Deg-A, Deg-B::OMA-2 was seen in 0–1 mNG-positive  
627 embryos and appeared to be the least stable (Figure S8E), as expected from our previous  
628 analysis (Figure 3 and Figure S7). mNG::Deg-A::OMA-2 was seen in 2 mNG-positive embryos and  
629 therefore appeared to be of intermediate stability (Figure S8D). Thus, although Deg-A is not  
630 sufficient for rapid elimination, it likely reduces the stability of mNG::Deg-A::OMA-2 in meiotic  
631 embryos. The consequent reduction in protein levels could contribute to the stronger *oma-*  
632 *2(tn1760)* embryonic phenotype, although it also seems possible that insertion of LIN-41 Deg-A

633 at the N-terminus of OMA-2 might perturb the nearby TAF-4 binding domain (Figure 3, A–C),  
634 which is critical for the function of OMA-2 in embryos (Güven-Ozkan *et al.* 2008).

635

636 ***GFP::LIN-41 is eliminated from embryos by SCF<sup>SEL-10</sup>***

637 Several different Skp, Cullin, F-box (SCF)-containing E3 ubiquitin ligase complexes promote  
638 protein degradation during meiosis and early embryogenesis in *C. elegans* (Peel *et al.* 2012; Du  
639 *et al.* 2015; Beard *et al.* 2016). We initially used RNAi to knock down the functions of each of  
640 the six cullins identified in the *C. elegans* genome (Kipreos *et al.* 1996; Nayak *et al.* 2002) to  
641 determine whether an SCF-type E3 ligase is involved in the elimination of GFP::LIN-41. In  
642 general, RNAi was initiated in *lin-41(tn1541)* hermaphrodites at the L4 larval stage and  
643 GFP::LIN-41 was examined in adults, two days after the initiation of the RNAi treatment at 22°C.  
644 Of the six cullins we tested, only the *cul-1(RNAi)*-treated animals produced multiple young  
645 embryos with faint GFP::LIN-41 (n=12), suggesting that CUL-1 may be required to eliminate  
646 GFP::LIN-41 from embryos. *rrf-1(pk1417)* mutants are RNAi-defective in certain somatic cells,  
647 including the somatic gonad, but are sensitive to RNAi in the germline (Sijen *et al.* 2001; Kumsta  
648 and Hansen 2012). Treatment of *rrf-1(pk1417) lin-41(tn1541)* hermaphrodites with *cul-1(RNAi)*  
649 also resulted in the failure to eliminate GFP::LIN-41 from early embryos (n=54; Figure 4C).  
650 Together, these results suggest that a germline-expressed CUL-1-containing SCF E3 ubiquitin  
651 ligase may eliminate GFP::LIN-41 from early embryos. At least three of the *C. elegans* cullins,  
652 *cul-1*, *cul-2* and *cul-3*, are important for normal embryonic development. We observed highly  
653 penetrant embryonic lethality after treating *rrf-1(pk1417) lin-41(tn1541)* and *lin-41(tn1541)*



654 animals with *cul-1(RNAi)* and *cul-3(RNAi)*, respectively. However, *cul-2(RNAi)* did not result in  
655 any obvious phenotypes. We therefore examined *lin-41(tn1541); cul-2(or209ts)* adults  
656 upshifted to 25°C as L4s to assess whether *cul-2* is important for the elimination of GFP::LIN-41  
657 from embryos. GFP::LIN-41 was eliminated normally from the dead embryos produced by *cul-*  
658 *2(or209ts)* parents at restrictive temperature (n=71), suggesting that a CUL-2-containing SCF E3  
659 ubiquitin ligase is not involved in the elimination of GFP::LIN-41 from embryos.

660 In SCF-type E3 ligases, cullins interact with Skp-1-related proteins. Twenty-one Skp1-  
661 related (*skr*) genes have been identified in *C. elegans*, and RNAi experiments suggest the closely  
662 related *skr-1* and *skr-2* genes function in the germline and early embryo (Nayak *et al.* 2002;  
663 Yamanaka *et al.* 2002; Shirayama *et al.* 2006; Fox *et al.* 2011; Mohammad *et al.* 2018). In  
664 addition, both SKR-1 and SKR-2 can interact with CUL-1 (Nayak *et al.* 2002, Yamanaka *et al.*  
665 2002). We therefore examined whether *skr-1(RNAi)*, which likely reduces the function of both  
666 *skr-1* and *skr-2*, would prevent the elimination of GFP::LIN-41 from early embryos. *lin-*  
667 *41(tn1541); skr-1(RNAi)* animals produced embryos with defects in the elimination of GFP::LIN-  
668 41 two days after RNAi treatment (n=26; Figure 4B). Treatment of *rrf-1(pk1417) lin-41(tn1541)*  
669 animals with *skr-1(RNAi)* also prevented the elimination of GFP::LIN-41 from early embryos  
670 (n=14). In addition, the *rrf-1(pk1417) lin-41(tn1541)* mutants treated with *skr-1(RNAi)* for two  
671 days at 22°C exhibited defects in germline morphology and embryo production that are  
672 consistent with the phenotypes previously described after *skr-1/2(RNAi)* (Nayak *et al.* 2002).

673 At least three F-box-containing substrate recognition subunits, LIN-23, PROM-1, and  
674 SEL-10, are thought to function with either SKR-1 or SKR-2 and CUL-1 in the *C. elegans* germline

675 or early embryos (Peel *et al.* 2012; Du *et al.* 2015; Kisielnicka *et al.* 2018; Mohammad *et al.*  
676 2018). LIN-23, SEL-10 and their vertebrate orthologs ( $\beta$ -TrCP and Fbw7, respectively) regulate  
677 the cell cycle and cell cycle-dependent protein degradation (Kipreos *et al.* 2000; Nakayama and  
678 Nakayama 2005; Welcker and Clurman 2008; de la Cova and Greenwald 2012). Because the  
679 rapid elimination of GFP::LIN-41 appears to be coupled to meiotic maturation, a cell-cycle  
680 event, we used RNAi to knock down the activities of *lin-23* and *sel-10* as a first step toward the  
681 analysis of candidate F-box proteins. *lin-23(RNAi)* had no effect on the elimination of GFP::LIN-  
682 41 from *rrf-1(pk1417) lin-41(tn1541)* embryos (n=52; Figure S9C). Consistent with this  
683 observation, mutations designed to prevent the phosphorylation of a possible  $\beta$ -TrCP binding  
684 site near the amino-terminus of LIN-41 (amino acids 32–38) also do not prevent the elimination  
685 of GFP::LIN-41 from embryos (*lin-41(tn1541tn1668)*; Figure S5, D and E). However, *sel-10(RNAi)*  
686 did prevent the elimination of GFP::LIN-41 from *rrf-1(pk1417) lin-41(tn1541)* embryos (n=17).  
687 Similarly, the elimination of GFP::LIN-41 from young embryos is prevented by the strong loss-of-  
688 function mutations *sel-10(ok1632)* and *sel-10(ar41)* (Figure 4, D, E, G, and I). All of our *sel*-  
689 *10(ar41)* strains also contain *lon-3(e2175)*, a convenient cis-linked marker that encodes a cuticle  
690 collagen (Nyström *et al.* 2002; Suzuki *et al.* 2002). GFP::LIN-41 is eliminated normally from *lon*-  
691 *3(e2175)* mutant embryos (Figure 4F). Finally, we observed that *sel-10(n1077)*, which has both  
692 gain-of-function and loss-of-function properties (Jäger *et al.* 2004), fails to eliminate GFP::LIN-  
693 41 from early embryos (Figure 4J). Genetic and physical interactions indicate that SEL-10 and  
694 SKR-1 function together in *C. elegans* (Killian *et al.* 2008; Kisielnicka *et al.* 2018). Because our  
695 *skr-1(RNAi)* experiments are likely to also target *skr-2* (Nayak *et al.* 2002), we are unable to  
696 parse out the relative roles of SKR-1 and SKR-2 at this time. Collectively, these observations

697 suggest that a germline-expressed SCF<sup>SEL-10</sup> E3 ubiquitin ligase containing SKR-1/2, CUL-1 and  
698 SEL-10 is likely involved in the elimination of GFP::LIN-41 from early embryos (Figure 5E).

699

### 700 ***SEL-10 functions through LIN-41 degradation domains***

701 LIN-41 can be detected in *sel-10(ok1632)* mutant but not wild-type embryos by western blot  
702 analysis (Figure S6C), indicating that endogenous and GFP-tagged LIN-41 behave similarly. We  
703 hypothesized that the Deg domains are likely used to target LIN-41 for degradation by SCF<sup>SEL-10</sup>.  
704 To test this hypothesis, we examined whether the premature elimination of mNG::Deg-A, Deg-  
705 B::OMA-2, which is mediated by the LIN-41 Deg domains, is prevented in *sel-10* mutant  
706 embryos. Although mNG::Deg-A, Deg-B::OMA-2 is eliminated by the pronuclear stage in  
707 otherwise wild-type 1-cell embryos, mNG::Deg-A, Deg-B::OMA-2 levels remain high in *lon-*  
708 *3(e2175) sel-10(ar41)* embryos at the same stage of embryonic development (Figure 3, F, G, J,  
709 and K, and Figure S7, G, H, K, and L). As for GFP::LIN-41, this is not caused by the cis-linked  
710 marker *lon-3(e2175)* (Figure S7, I and J). These observations suggest that *sel-10(ar41)* should  
711 suppress the completely penetrant maternal-effect lethal phenotype exhibited by *oma-*  
712 *1(zu405te33); oma-2(tn1764)* mutants (Table 2). Consistent with this expectation, *oma-*  
713 *1(zu405te33); oma-2(tn1764) lon-3(e2175) sel-10(ar41)* animals produce hatchlings and can be  
714 maintained as a homozygous strain (Table 2). However, we note that *sel-10(ar41)* is a relatively  
715 weak suppressor of the *oma-1(zu405te33); oma-2(tn1764)* maternal-effect lethal mutant  
716 phenotype, since only 10–15% of the embryos produced by *oma-1(zu405te33); oma-2(tn1764)*  
717 *lon-3(e2175) sel-10(ar41)* animals hatch. This observation is consistent with the possibility that

718 mNG::Deg-A, Deg-B::OMA-2 may only be partially functional in the 1-cell embryo. One  
719 possibility is that the Deg-A, Deg-B insertion perturbs OMA-2 function. Additionally, *sel-*  
720 *10(ar41)* mildly reduces mNG::OMA-2 accumulation in the germline likely through effects on  
721 GLD-1 (see below). Although the degradation of OMA-1, and presumably OMA-2, appears to be  
722 mediated by several SCF E3 ubiquitin ligases, SEL-10 has not been implicated in this process  
723 (Shirayama *et al.* 2006; Du *et al.* 2015). Indeed, mNG::OMA-2 is degraded at the expected time  
724 in *oma-2(cp145) lon-3(e2175) sel-10(ar41)* embryos (Figure S7, C and D). Likewise, mNG::Deg-A,  
725 Deg-B::OMA-2 levels only remain high until the end of the 1-cell stage in *oma-2(tn1764) lon-*  
726 *3(e2175) sel-10(ar41)* embryos, when the degradation of OMA-2 is normally initiated (Figure S7,  
727 K and L). We conclude that SEL-10 is not required for the elimination of OMA-2 and likely  
728 functions through the LIN-41 Deg domains to promote the proteolytic degradation of LIN-41  
729 and mNG::Deg-A, Deg-B::OMA-2 during meiosis.

730

### 731 ***SEL-10 is required for the CDK-1-dependent elimination of GFP::LIN-41***

732 Substrate recognition subunits such as SEL-10 recognize their targets by binding to short linear  
733 sequence motifs called degrons (Lucas and Ciulli 2017). LIN-41 Deg domains were therefore  
734 examined for sequences similar to the SEL-10/Fbw7/Cdc4 degron consensus sequence  
735  $\Phi\Phi$ [pT/pS]PXX[pT/pS/E/D], where  $\Phi$  represents a hydrophobic amino acid. This degron is  
736 commonly referred to as a Cdc4 phosphodegron or CPD; it contains two essential residues, a  
737 phosphorylated residue that is typically a phosphothreonine, immediately followed by a proline  
738 (pTP) (Nash *et al.* 2001). Residues surrounding LIN-41 T83, which is important for the

739 elimination of LIN-41 from embryos, are poor matches to this consensus sequence (sequence  
740 FDTPPSM, mismatches are underlined; Figure S10). The best match to a high-affinity CPD  
741 appears to be around residue T340 in the LIN-41 Deg-B2 domain (sequence LATPMSS; Figure  
742 S10). This was the only candidate Fbw7 binding site identified in LIN-41 using the Eukaryotic  
743 Linear Motif (ELM) database (Gouw *et al.* 2018), which requires a perfect match to a relatively  
744 stringent consensus sequence. However, changing T340 to an alanine (T340A) (e.g.: *lin-*  
745 *41(tn1541tn1775)* has no effect on the elimination of GFP::LIN-41 from embryos (Figure 2C and  
746 Figure S4, K and L). Therefore, if SEL-10 binds directly to LIN-41 Deg domains it might recognize  
747 imperfect or lower-affinity degrons. We note that the SEL-10 ortholog Cdc4p utilizes multiple  
748 imperfect degrons to target the cell division protein Sic1p for degradation (Nash *et al.* 2001).  
749 Likewise, multiple weak degrons in an intrinsically disordered region of the c-Jun protein  
750 synergize to promote a high-affinity interaction with the SEL-10 ortholog Fbw7 (Csizmok *et al.*  
751 2018). It seems plausible that SEL-10 might function similarly. Alternatively, the failure to  
752 eliminate LIN-41 from embryos could be an indirect consequence of the lack of SCF<sup>SEL-10</sup>. To  
753 begin to address this possibility, we sought to clarify the epistatic relationships between *sel-10*  
754 and other factors involved in the elimination of GFP::LIN-41 from embryos.

755 CDK-1 was previously shown to be required for the elimination of GFP::LIN-41 (Spike *et*  
756 *al.* 2014a). Likewise, *cdk-1(RNAi)* on *rrf-1(pk1417) lin-41(tn1541)* hermaphrodites prevents the  
757 elimination of GFP::LIN-41 from embryos (n=67; Figure S9, A and B). Therefore, germline-  
758 expressed CDK-1 likely promotes the elimination of GFP::LIN-41. CDK-1 is a conserved and  
759 essential cell-cycle regulator required for M-phase entry and progression during both meiotic  
760 and mitotic cell divisions (Boxem *et al.* 1999). Consequently, most *cdk-1* alleles are sterile,

761 precluding the examination of GFP::LIN-41 in *cdk-1* mutant embryos. Two temperature-  
762 sensitive alleles of *cdk-1* that produce oocytes have been described; both cause a later  
763 embryonic arrest phenotype than the 1-cell meiotic arrest phenotype seen after *cdk-1(RNAi)*  
764 (Boxem *et al.* 1999; Shirayama *et al.* 2006). Furthermore, although both mutations alter  
765 residues in the T loop/activation domain of CDK-1, neither *cdk-1(ts)* allele causes obvious cell-  
766 cycle defects (Shirayama *et al.* 2006). We examined GFP::LIN-41 in *cdk-1(ne2257ts)* animals at  
767 the restrictive temperature and found that GFP::LIN-41 disappears normally from embryos  
768 (n=57; Figure S9, E and F). Similarly, GFP::LIN-41 disappears normally in *cks-1(ne549ts)* mutant  
769 embryos (n=33; Figure S9, G and H), which phenotypically resemble *cdk-1(ne2257ts)* embryos  
770 at the restrictive temperature (Shirayama *et al.* 2006). Thus, the subset of CDK-1 activities  
771 affected by *cdk-1(ne2257ts)* does not include either the elimination of GFP::LIN-41 or entry into  
772 meiotic M phase.

773 Kinases other than CDK-1 might play a role in the SEL-10-mediated elimination of LIN-  
774 41. Indeed, WEE-1.3, a kinase that negatively regulates CDK-1 (Burrows *et al.* 2006), prevents  
775 the premature elimination of GFP::LIN-41 from oocytes (Spike *et al.* 2014a). However, our  
776 attempts to identify additional kinases that affect the elimination of GFP::LIN-41 have so far  
777 been unsuccessful. For example, the mitogen-activated protein (MAP) kinase MPK-1 is active in  
778 the late stages of oogenesis and is an important regulator of oocyte meiotic maturation (Lee *et*  
779 *al.* 2007). Furthermore, as a proline-directed serine/threonine kinase, MPK-1 could potentially  
780 phosphorylate CPDs in LIN-41 Deg domains. However, GFP::LIN-41 disappears normally in *mpk-*  
781 *1(ga111ts)* embryos at the restrictive temperature (n=97; Figure S9, I–L). Likewise, the Aurora  
782 kinase AIR-2 is present and active in maturing oocytes (Schumacher *et al.* 1998), but GFP::LIN-

783 41 is eliminated normally after *air-2* gene function is attenuated by *air-2(or207ts)* (n=14), by *air-*  
784 *2(RNAi)* (n=40), or after *air-2(RNAi)* on *air-2(or207ts)* mutants (n=38; Figure S9, M and N). Other  
785 single kinase knock-down or elimination experiments that have failed to affect the elimination  
786 of GFP::LIN-41 from *lin-41(tn1541)* embryos include *gsk-3(RNAi)* (n=32), *cdk-2(RNAi)* (n=24), *plk-*  
787 *1(RNAi)*, and *mbk-2(pk1427)* (Spike 2014a). Since LIN-41 functions to inhibit CDK-1 activation  
788 for M-phase entry during meiotic maturation (Spike *et al.* 2014a), CDK-1 may be the chief  
789 effector kinase mediating feedback regulation of wild-type LIN-41.

790 SEL-10/Fbw7/Cdc4p degrons are only activated after being phosphorylated by a proline-  
791 directed serine/threonine kinase such as CDK-1. Thus, prior phosphorylation by CDK-1 might be  
792 required for SEL-10 to directly interact with degrons in the LIN-41 Deg domains. *cdk-1(RNAi)*  
793 and *sel-10(lf)* cause the same phenotype with respect to GFP::LIN-41 degradation, precluding a  
794 direct analysis of their epistatic relationship. However, it is possible to examine this relationship  
795 indirectly through *wee-1.3* (Burrows *et al.* 2006). GFP::LIN-41 is eliminated prematurely when  
796 *wee-1.3* function is attenuated by RNAi; this occurs in both wild-type (Spike *et al.* 2014a) and  
797 *lon-3(e2175)* mutants (n=21; Figure 5, A and B). When the same experiment is performed in  
798 *lon-3(e2175) sel-10(ar41)* mutants, however, GFP::LIN-41 is not eliminated prematurely.  
799 Instead, GFP::LIN-41 persists, typically at reduced levels, in the proximal oocytes of *lon-*  
800 *3(e2175) sel-10(ar41); wee-1.3(RNAi)* animals (n=51; Figure 5, C and D). Because CDK-1 is  
801 prematurely activated, *wee-1.3(RNAi)* oocytes mature prematurely and exhibit numerous  
802 defects (Burrows *et al.* 2006). Obvious oocyte abnormalities caused by strong *wee-1.3(RNAi)*  
803 are evident in *sel-10(ar41)* mutants, confirming that these animals are competent to respond to  
804 *wee-1.3(RNAi)* (Figure 5, compare B and D). We conclude that the epistatic relationship

805 between *wee-1.3* and *sel-10* is consistent with the model shown in Figure 5E, which postulates  
806 that active CDK-1 promotes the phosphorylation of LIN-41 and its subsequent destruction by an  
807 SCF<sup>SEL-10</sup> E3 ubiquitin ligase.

808

809 ***Embryonic LIN-41 does not strongly inhibit the expression of mRNAs repressed by LIN-41***

810 LIN-41 represses the translation of several different mRNAs during oogenesis (Spike *et al.*  
811 2014b; Tsukamoto *et al.* 2017). Their protein products normally begin to accumulate in late  
812 oogenesis or early embryogenesis, and some are essential for normal development (Gomes *et*  
813 *al.* 2001; Leacock and Reinke 2008; Tsukamoto *et al.* 2017). We therefore anticipated that the  
814 failure to eliminate LIN-41 would result in the ectopic repression of these mRNAs, and that this,  
815 in turn, might result in embryo or oocyte abnormalities. However, the *lin-41(tn1767)* mutant,  
816 which fails to eliminate LIN-41[T83A] from early embryos, appears essentially wild-type at 20°C  
817 (Table 1). Similarly, *sel-10(ok1632)* and *sel-10(ar41)* mutants, which fail to eliminate LIN-41  
818 from early embryos, produce large broods of progeny at 20°C that are similar in size to  
819 genotype-matched controls (Table 3). Indeed, we only observed a moderate decrease in fertility  
820 when *sel-10(ok1632)* mutants were grown at an elevated temperature (25°C; Table 3). We  
821 therefore decided to examine the amount of protein made by several LIN-41 target mRNAs  
822 (*spn-4*, *meg-1*, and *orc-1* mRNAs, respectively) in strains that fail to eliminate LIN-41 from  
823 embryos, as this should provide a sensitive way to monitor LIN-41 translational repression  
824 activity. Protein expression was examined using fluorescently-tagged alleles of each gene; the  
825 proteins made by *spn-4(tn1699[spn-4::gfp::3xflag])*, *meg-1(tn1724[gfp::3xflag::meg-1])* and



826 *orc-1(tn1732[mng::3xflag::orc-1])* were previously shown to be ectopically or prematurely  
827 expressed in *lin-41(lf)* oocytes (Tsukamoto *et al.* 2017). As described below, only minor  
828 differences in protein expression were observed in *lin-41(tn1767)* and *sel-10(ar41)* embryos and  
829 oocytes (Figure 6 and Figure S11). Collectively, these observations suggest that the ectopic LIN-  
830 41 present in *lin-41(tn1767)* and *sel-10(lf)* embryos is largely ineffective at repressing  
831 translation.

832 LIN-41 mediates 3'-UTR-dependent translational repression of *spn-4*, and *spn-4* mRNA is  
833 the most abundant and enriched mRNA in LIN-41 RNPs (Tsukamoto *et al.* 2017). SPN-4::GFP is  
834 faint, but visible, in 1 or 2 proximal oocytes and rapidly accumulates during the oocyte-to-  
835 embryo transition (Tsukamoto *et al.* 2017). This pattern, and the amount of SPN-4::GFP in early  
836 embryos, is largely unaffected by *lin-41(tn1767)* and *sel-10(ar41)* at 20°C (Figure 6, A, B, G, and  
837 H, and Figure S11, A, B, K, and L). Quantification of GFP levels revealed no differences in SPN-  
838 4::GFP levels in *lin-41(tn1767); spn-4(tn1699)* 1- and 2-cell embryos and a slight reduction in  
839 SPN-4::GFP levels in *spn-4(tn1699) lon-3(e2175) sel-10(ar41)* 2-cell embryos relative to age and  
840 genotype-matched controls (Figure 6, K and L). In these quantitative experiments, we analyzed  
841 the anterior cytoplasm of 1- and 2-cell embryos and did not include the bright puncta of SPN-  
842 4::GFP evident in the posterior cytoplasm (see Materials and Methods). Finally, we also failed to  
843 identify any apparent differences in SPN-4::GFP accumulation or intensity in *spn-4(tn1699) lon-*  
844 *3(e2175) sel-10(ar41)* (n=26) and *spn-4(tn1699) lon-3(e2175)* (n=19) animals upshifted as L4s to  
845 25°C.

846 GFP::MEG-1 expression is evident somewhat earlier in oogenesis than SPN-4::GFP and  
847 seems to accumulate more slowly. Again, the pattern and amount of GFP::MEG-1 was largely  
848 unaffected in *lin-41(tn1767)* and *sel-10(ar41)* mutants at 20°C (Figure 6, C, D, I, and J, and Figure  
849 S11, C, D, G, and H). GFP::MEG-1 has a complex pattern of accumulation in the early embryo; it  
850 appears to be eliminated from somatic blastomeres and localizes, at least partially, to P  
851 granules (Figure 6C and Figure S11C), similar to what was previously described by Leacock and  
852 Reinke (2008) for endogenous MEG-1. Due to these complexities, we quantified GFP::MEG-1  
853 levels in the cytoplasm of proximal oocytes instead of embryos. There were no differences in  
854 GFP::MEG-1 levels in *lin-41(tn1767); meg-1(tn1724)* animals and only a slight reduction in the  
855 1 oocytes of *lon-3(e2175) sel-10(ar41); meg-1(tn1724)* animals relative to controls. Finally, we  
856 examined *lon-3(e2175) sel-10(ar41); meg-1(tn1724)* (n=17) and *lon-3(e2175); meg-1(tn1724)*  
857 (n=15) animals upshifted as L4s to 25°C, but again failed to identify any apparent differences in  
858 GFP::MEG-1 accumulation.

859 mNG::ORC-1 is not visibly expressed in oocytes but becomes increasingly evident in  
860 embryos as they develop (Tsukamoto *et al.* 2017). mNG::ORC-1 associates with chromatin at  
861 certain stages of the cell cycle (Sonneville *et al.* 2012), and is faintly visible in 1-cell embryos  
862 during metaphase of the first mitotic division (Figure 6E). mNG::ORC-1 was only examined in *lin-*  
863 *41(tn1767)* mutants at 20°C. As for SPN-4::GFP and GFP::MEG-1, the pattern and amount of  
864 mNG::ORC-1 was largely unaffected by *lin-41(tn1767)* (Figure 6, E and F, and Figure S11, E and  
865 F). Most importantly, the small amount of mNG::ORC-1 visible in 1-cell embryos was not  
866 obviously reduced in the *lin-41(tn1767)* background. Because LIN-41 is a potent translational  
867 repressor of *spn-4*, *meg-1*, and *orc-1* (Tsukamoto *et al.* 2017), we conclude that a mechanism

868 distinct from SCF<sup>SEL-10</sup>-mediated degradation antagonizes LIN-41 function to promote their  
869 expression during the late stages of oogenesis and the OET.

870 Because molecular tests failed to reveal an increase in LIN-41 activity in *sel-10* mutants,  
871 we also tested the ability of a *sel-10(ok1632)* strong loss-of-function mutation to suppress the  
872 temperature-sensitive *lin-41(tn1487ts)* allele at a semi-permissive temperature. This was found  
873 not to be the case; rather, *sel-10(ok1632)* enhanced the *lin-41(tn1487ts)* defects (Table 3).  
874 Taken together, these results indicate that the regulation of LIN-41 by *sel-10* is nonessential.

875

#### 876 ***SEL-10 promotes the elimination of GLD-1 from oocytes***

877 GLD-1 is a translational repressor that, like LIN-41, controls and coordinates oocyte  
878 differentiation and cell cycle progression (Francis *et al.* 1995a,b; Jones *et al.* 1996). In *gld-*  
879 *1(q485)* null mutants, pachytene-stage oocytes re-enter the mitotic cell cycle and form a tumor  
880 (Francis *et al.* 1995a,b). GLD-1 also has redundant functions to inhibit the proliferative fate of  
881 germline progenitor cells and to promote their entry into the meiotic pathway of development  
882 during oogenesis and spermatogenesis, as well as a function to promote spermatogenesis in  
883 hermaphrodites (Francis *et al.* 1995a,b; Kadyk and Kimble 1998). GLD-1 is abundantly expressed  
884 during the early and middle stages of meiotic prophase, but eliminated from oocytes as they  
885 progress from late pachytene through diplotene and to diakinesis during the later stages of  
886 oocyte development (Jones *et al.* 1996). GLD-1 binds to, and represses the translation of, many  
887 mRNAs that are normally translated in oocytes (Lee and Schedl 2001; Lee and Schedl 2004;  
888 Schumacher *et al.* 2005; Wright *et al.* 2011; Jungkamp *et al.* 2011; Scheckel *et al.* 2012). Thus, it

889 has generally been assumed that the elimination of GLD-1 from oocytes permits the translation  
890 of these mRNAs (reviewed in Lee and Schedl 2010). Although it occurs at an earlier stage of  
891 oocyte development, this model is analogous to what we originally hypothesized with respect  
892 to LIN-41. However, because the LIN-41 ectopically found in *sel-10* loss-of-function embryos  
893 appears to be insufficient to sustain translational repression, it seems likely that the activity of  
894 LIN-41 is also regulated by a non-proteolytic mechanism. Given the similarities between LIN-41  
895 and GLD-1, we wondered whether GLD-1 might also be regulated by both proteolytic and non-  
896 proteolytic mechanisms.

897 To begin to approach this question, we investigated whether the elimination of GLD-1,  
898 like LIN-41, requires SEL-10. Surprisingly, we found that GLD-1::GFP and GLD-1 do indeed  
899 persist at elevated levels in the oocytes of *sel-10(ar41)* and *sel-10(ok1632)* mutants (Figure 7, A  
900 and B, and Figure S12, A, B, D, and E), indicating that LIN-41 and GLD-1 may be regulated  
901 similarly. Indeed, while we were completing this work, the failure to eliminate GLD-1 in a timely  
902 fashion from *sel-10(ok1632)* mutant oocytes was independently discovered by Kisielnicka *et al.*  
903 (2018). Their results suggest that both GLD-1 and the cytoplasmic polyadenylation element-  
904 binding protein CPB-3 are likely degraded by essentially the same SCF<sup>SEL-10</sup> E3 ubiquitin ligase  
905 (Kisielnicka *et al.* 2018) that regulates LIN-41 (this work). Consistent with this hypothesis, they  
906 observed that slow-migrating isoforms of GLD-1, which are likely phosphorylated (Jeong *et al.*  
907 2011), accumulate in *sel-10(ok1632)* mutants. In agreement with this finding, we also observe  
908 an increase in the slow-migrating isoforms of GLD-1 in both *sel-10(ok1632)* and *sel-10(ar41)*  
909 mutants relative to controls (Figure 7C).

910           It was recently proposed that sperm trigger the proteasome-dependent elimination of  
911 GLD-1 from oocytes such that a GFP::GLD-1 transgene (an N-terminal fusion) was expressed at  
912 higher levels in unmated females than in mated females or hermaphrodites (Bohnert and  
913 Kenyon 2017). We therefore decided to examine the localization of a rescuing GLD-1::GFP  
914 transgene (a C-terminal fusion) in both wild-type and *sel-10(ar41)* mutant females, which lack  
915 sperm. However, in our experiments, GLD-1::GFP did not persist at elevated levels in female  
916 oocytes; instead, it was eliminated from oocytes in both the presence and absence of sperm  
917 (Figure 7, A and D, Figure S12, A and C). Likewise, endogenous GLD-1, detected with specific  
918 antibodies (Jan *et al.* 1999), also disappeared from oocytes in both hermaphrodites and females  
919 (Figure S12, D and F). However, GLD-1::GFP levels remained elevated in the oocytes of *sel-*  
920 *10(ar41)* mutant females (Figure 7E). Oocytes remain in the gonad for an extended period of  
921 time in the absence of sperm (McCarter *et al.* 1999). Indeed, we noticed that there seemed to  
922 be relatively less GLD-1::GFP in the *sel-10(ar41)* oocytes of females as compared to  
923 hermaphrodites, possibly as a result of *sel-10*-independent protein turnover. From these  
924 results, we conclude that the *sel-10*-dependent elimination of GLD-1::GFP is sperm-  
925 independent. Furthermore, the expression patterns of GLD-1::GFP, which rescues the *gld-*  
926 *1(q485)* null mutation to fertility (Schumacher *et al.* 2005; Figure 7A), and endogenous GLD-1  
927 (Figure S12, D and F), fail to support the hypothesis that sperm trigger the elimination of GLD-1  
928 from oocytes. We have tested the GFP::GLD-1 transgene (*axIs1498[pie-1p::gfp::gld-1::gld-1*  
929 *3'UTR, unc-119(+)]*; Merritt *et al.* 2008 ) used by Bohnert and Kenyon (2017) to monitor GLD-1  
930 expression in females; however, we found that it fails to rescue *gld-1(q485)* null mutants to  
931 fertility. Adult *gld-1(q485); axIs1498* hermaphrodites are invariably sterile and exhibit a range

932 of phenotypes from a tumorous phenotype that is equivalent to the null allele to the  
933 production of abnormal oocytes. We analyzed 192 progeny from *gld-1(q485)/+; axIs1498* adult  
934 hermaphrodites; 53 (27.6%) were *gld-1(q485); axIs1498* and were sterile, consistent with the  
935 inability of *axIs1498* to provide wild-type *gld-1* function. We conclude that the increased  
936 expression of GFP::GLD-1 observed in the oocytes of *axIs1498* females (Bohnert and Kenyon  
937 2017) is most likely a transgene expression artifact and does not reflect the expression and  
938 regulation of endogenous GLD-1.

939

940 ***Ectopic GLD-1 in proximal oocytes does not strongly inhibit the expression of mRNAs***  
941 ***repressed by GLD-1***

942 As for LIN-41, we examined whether the mRNA targets of GLD-1-mediated translational  
943 repression are ectopically repressed in *sel-10(ar41)* mutant oocytes. Studies of GLD-1 function  
944 in the proliferative versus meiotic entry decision of germline progenitor cells demonstrate that  
945 GLP-1/Notch signaling functions to inhibit GLD-1 accumulation in the distal end of the germline.  
946 When GLD-1 accumulates ectopically in *glp-1* mutants, or double mutants affecting the Pumilio  
947 and FBF proteins FBF-1 and FBF-2, germline progenitor cells fail to proliferate and prematurely  
948 enter the meiotic pathway of development (Crittenden *et al.* 2002; Hansen *et al.* 2004). Thus,  
949 our initial expectation was that ectopic GLD-1 expression in proximal oocytes in strong *sel-10*  
950 loss-of-function mutants might exert substantial effects on the repression of its mRNA targets.  
951 As for LIN-41, this proved not to be the case; only subtle or modest effects were observed as  
952 described below.

953 GLD-1 binds the 3'-UTR of the *spn-4* mRNA (Junkamp *et al.* 2011), which we initially  
954 examined as a LIN-41 target, and GLD-1 appears to repress SPN-4 accumulation in the distal  
955 germline (Mootz *et al.* 2004). As described previously, SPN-4::GFP expression was not strongly  
956 affected by the *sel-10(ar41)* mutation (Figure S11, I–L) despite the ectopic expression of both  
957 GLD-1 and LIN-41 (Figure 4 and Figure 7). MEX-3 is expressed in proximal oocytes and also  
958 appears to be repressed by GLD-1 (Mootz *et al.* 2004; Jungkamp *et al.* 2011). We used the  
959 fluorescently-tagged *mex-3(tn1753[gfp::3xflag::mex-3])* allele to quantitatively examine the  
960 expression of GFP::MEX-3 in these oocytes at both 20° and 25°C. GFP::MEX-3 levels were not  
961 reduced in *sel-10(ar41)* oocytes at either temperature, but were generally very similar to the  
962 wild-type controls (Figure 7F, and Figure S12H). In addition, we examined the expression of the  
963 yolk receptor RME-2 (Grant and Hirsh 1999), a well-established target of GLD-1-mediated  
964 translational repression (Lee and Schedl 2001; Junkamp *et al.* 2011; Wright *et al.* 2011). We  
965 began by examining the expression of RME-2::GFP from *pwIs116[rme-2p::rme-2::GFP::rme-2*  
966 *3'UTR]* in oocytes at 22°C, to prevent transgene silencing. Again, the levels of RME-2::GFP were  
967 similar in the proximal oocytes of *sel-10(ar41)* and wild-type controls (Figure 7, G and H).  
968 Likewise, similar levels of endogenous RME-2 were seen in *sel-10(ok1632)* and wild-type  
969 oocytes stained with anti-RME-2-specific antibodies (Figure S12, I and J). Finally, we examined  
970 the expression of OMA-2, another well-established target of GLD-1-mediated translational  
971 repression (Lee and Schedl 2004; Wright *et al.* 2011; Scheckel *et al.* 2012). As we examined the  
972 expression of mNG::OMA-2 in *sel-10(ar41)* embryos in our analysis of LIN-41 Deg domains  
973 (Figure S7, A–D; described above), we quantitatively compared the expression level of  
974 mNG::OMA-2 expression in the proximal oocytes of the wild type and *sel-10(ar41)* mutants and

975 observed a modest reduction (~30–50%) in mNG::OMA-2 expression levels in *sel-10(ar41)*  
976 mutants (Figure 7I). This result is agreement with the finding that an antibody that detects  
977 OMA-2 and its paralog OMA-1 exhibits a modest reduction in immuofluorescence staining (~10-  
978 33%, depending on the region of the proximal gonad analyzed) in the *sel-10(ok1632)* strong  
979 loss-of-function mutant (Kisielnicka *et al.* 2018).

980 Collectively, these results suggest that the ectopic GLD-1 in *sel-10* mutant oocytes is  
981 minimally effective at repressing translation of mRNA targets. The observation that some  
982 targets (e.g., *spn-4*, *mex-3*, and *rme-2*) might be unaffected by ectopic GLD-1, whereas others  
983 (e.g., *oma-2*) are modestly affected, is consistent with the observation that certain *gld-1* mutant  
984 alleles disrupt binding and repression of some mRNA targets but not others (Schumacher *et al.*  
985 2005). Furthermore, these observations are again consistent with the fact that *sel-10* mutants  
986 are viable and fertile (Table 3), as the efficient repression of proteins such as SPN-4, MEX-3 and  
987 RME-2 during oogenesis should have negative consequences for embryonic development  
988 (Draper *et al.* 1996; Grant and Hirsh 1999; Gomes *et al.* 2001).

989

### 990 ***The SCF<sup>SEL-10</sup>-dependent degradation of LIN-41 and GLD-1 depend on different kinases***

991 As described above, the SCF<sup>SEL-10</sup>-dependent degradation of LIN-41 depends on CDK-1, but not  
992 MPK-1 (Figure S9, I–L). Consequently, we examined the requirement of these kinases for the  
993 SCF<sup>SEL-10</sup>-dependent degradation of GLD-1. Whereas *cdk-1(RNAi)* or *cdk-2(RNAi)* had no effect  
994 on the accumulation of GLD-1::GFP in proximal oocytes (n=14 and n=23, respectively), we  
995 observed ectopic expression of GLD-1::GFP in the proximal oocytes of *ozls5[gld-1::gfp]; mpk-*



996 *1(ga111ts)* hermaphrodites at the non-permissive temperature (Figure S13). Thus, although  
997 both GLD-1 and LIN-41 are regulated by SCF<sup>SEL-10</sup>-dependent degradation, the temporal and  
998 spatial control of their accumulation during oogenesis is differentially responsive to protein  
999 kinase signaling, befitting their individual biological functions in promoting oogenesis.

1000

1001  
1002  
1003  
1004  
1005  
1006  
1007  
1008  
1009  
1010  
1011  
1012  
1013  
1014  
1015  
1016  
1017  
1018  
1019  
1020  
1021

## DISCUSSION

### ***Feedback regulation of LIN-41 and the spatial control of oocyte meiotic maturation***

The oocytes of most sexually reproducing animals arrest in meiotic prophase for a prolonged period (reviewed by Huelgas-Morales and Greenstein 2017; Avilés-Pagán and Orr-Weaver 2018). This conserved arrest likely enables transcriptionally quiescent oocytes to grow by accumulating cellular organelles and cytoplasmic factors needed for embryonic development. Indeed, in *C. elegans* oocyte growth and meiotic maturation are coordinately controlled by LIN-41. In the absence of LIN-41 function, pachytene-stage oocytes abruptly cellularize, activate CDK-1, and enter M phase (Spike *et al.* 2014a). A salient feature of *C. elegans* oogenesis is that meiotic maturation is restricted to the oocyte in the most proximal position adjacent the spermatheca. This restriction ensures that only fully grown oocytes undergo meiotic maturation when they are positioned to enter the spermatheca during ovulation so they can become fertilized. Genetic evidence suggests that OMA proteins function to inhibit LIN-41 to facilitate meiotic maturation of the most proximal oocyte (Spike *et al.* 2014a). Specifically, proximal oocytes fail to enter M phase in *lin-41(ts); oma-1(null); oma-2(null)* triple mutants; whereas, pachytene stage oocytes prematurely enter M phase in *lin-41(null); oma-1(null); oma-2(null)* triple mutants (Spike *et al.* 2014a). Thus, the OMA proteins are absolutely required to spatially restrict for M-phase entry to the -1 oocyte, where they counteract LIN-41's inhibitory activity. Consistent with this idea, molecular evidence suggests that LIN-41 is inactivated as a translational repressor in the final stages of oogenesis (Spike *et al.* 2014a; Tsukamoto *et al.* 2017), which precedes the elimination of LIN-41 upon the onset of meiotic maturation.

1022 Specifically, two targets of LIN-41-mediated translational repression, *spn-4* and *meg-1*, are co-  
1023 expressed with LIN-41 in the most proximal oocytes. The expression of *spn-4* and *meg-1* in  
1024 proximal oocytes requires the function of the OMA proteins (Tsukamoto *et al.* 2017), consistent  
1025 with the idea that the OMA proteins antagonize LIN-41 function in the late stages of oogenesis.

1026 Here we show that the SCF<sup>SEL-10</sup> promotes the rapid ubiquitin-mediated degradation of  
1027 LIN-41 that leads to its elimination during meiosis I. Analysis of *sel-10* mutants indicates that  
1028 the inactivation and degradation of LIN-41 are separable; the LIN-41 that accumulates in *sel-10*  
1029 mutants appears to be largely inactive as a translational repressor. However, we did note that  
1030 several LIN-41 variants (LIN-41(T83A) and LIN-41( $\Delta$ Deg-A)), which are defective in the SCF<sup>SEL-10</sup>-  
1031 mediated degradation, decrease the meiotic maturation rate. This finding is consistent with the  
1032 idea that LIN-41 inhibits meiotic maturation and that SCF<sup>SEL-10</sup>-mediated degradation  
1033 constitutes a non-essential component of the regulatory mechanism. The nature of the  
1034 “primary” mechanism inactivating LIN-41 prior to its degradation is currently unknown but  
1035 could act on LIN-41 directly or another component of the large RNP complex it associates with  
1036 (Spike *et al.* 2014b; Tsukamoto *et al.* 2017).

1037 LIN-41 and CDK-1 reciprocally inhibit one another’s activity. Thus, the “primary”  
1038 inactivation mechanism might play a key role in tipping the balance between LIN-41 and CDK-1  
1039 to generate a spatially restricted all-or-none meiotic maturation response. Upon its activation,  
1040 CDK-1 triggers meiotic maturation and promotes the SCF<sup>SEL-10</sup>-dependent elimination of LIN-41.  
1041 The elimination of LIN-41 requires the Deg-A and Deg-B domains in the LIN-41 N-terminal  
1042 region. The LIN-41 Deg-A and Deg-B domains are intrinsically disordered and contain

1043 sequences that might function as phosphodegrons. The SCF<sup>SEL-10</sup>-dependent elimination of LIN-  
1044 41 is blocked by the T83A mutation affecting a predicted CDK-1 phosphorylation site within the  
1045 Deg-A domain, though whether this regulation is direct or indirect remains to be determined.  
1046 We note one exception to the rule that CDK-1 activity promotes LIN-41 degradation. The *lin-*  
1047 *41(tn1541tn1618)* mutation (Figure 2), which deletes the NHL domain, produces a strong loss-  
1048 of-function *lin-41* mutant phenotype in which pachytene-stage oocytes enter M phase  
1049 precociously. Nonetheless, we observe that the GFP::LIN-41( $\Delta$ NHL) protein still accumulates in  
1050 the proximal gonad, albeit in an aberrantly punctate pattern (Figure S3, G–J). Interestingly, in  
1051 the presence of a wild-type LIN-41 protein, the GFP::LIN-41( $\Delta$ NHL) mutant protein accumulates  
1052 normally and is subject to SCF<sup>SEL-10</sup>-dependent degradation on schedule. It may be that the  
1053 accumulation of the GFP::LIN-41( $\Delta$ NHL) protein in a punctate pattern correlates with its  
1054 inaccessibility to CDK-1-dependent regulation. Alternatively, the degradation of LIN-41 during  
1055 meiotic maturation may depend on LIN-41 activity during pachytene, as could be the case if a  
1056 component of the SCF<sup>SEL-10</sup> degradation mechanism depends on *lin-41* function for its synthesis  
1057 or activity.

1058         The Deg domains may function as a timer to ensure that CDK-1 activity reaches an  
1059 optimal threshold to ensure the successful completion of the meiotic divisions prior to the  
1060 initiation of LIN-41 degradation. If LIN-41 is eliminated too early the fidelity of meiotic  
1061 chromosome segregation may be compromised as is observed in certain hypomorphic *lin-41*  
1062 mutant alleles (e.g., *tn1487tn1515*, *tn1487tn1516*, *tn1487tn1536*, and *tn1487tn1539*; Spike *et*  
1063 *al.* 2014a). Thus, it will be important to elucidate the precise mechanisms by which the LIN-41  
1064 Deg domains link CDK-1 activity to SCF<sup>SEL-10</sup>-mediated degradation. The regulation of the G1/S

1065 phase transition in budding yeast provides a framework for thinking about this issue (Nash *et al.*  
1066 2001; Kõvomägi *et al.* 2011; Yang *et al.* 2013; reviewed by Hopkins *et al.* 2017). The cyclin-  
1067 dependent kinase complex, Cdk1–Clb5/6 promotes the entry into S phase but is inhibited by  
1068 binding to its inhibitor Sic1 (Nugroho and Mendenhall 1994; Schwob *et al.* 1994). Sic1 is a  
1069 substrate of the Cdk1–Clb5/6 kinase, which phosphorylates Sic1 to promote SCF<sup>Cdc4</sup>-mediated  
1070 degradation (Verma *et al.* 1997; Feldman *et al.* 1997; Nash *et al.* 2001). The cyclin-dependent  
1071 kinase Cdk1–Cln1/2 initiates the decision to enter S phase during G1 and is not inhibited by  
1072 Sic1. Phosphorylation of Sic1 by Cdk1–Cln1/2, while not sufficient to trigger Sic1 degradation,  
1073 primes Sic1 for multisite phosphorylation by Clb5/6. The Sic1 CPD sequences contain multiple  
1074 sites for phosphorylation by both Cdk1–Clb5/6 and Cdk1–Cln1/2, which results in the switch-  
1075 like destruction of Sic1. A failure to degrade Sic1 substantially delays the G1/S transition,  
1076 whereas deletion of SIC1 causes DNA replication to initiate too early, resulting in genome  
1077 instability (Nugroho *et al.* 1994; Cross *et al.* 2007). Further dissection of the mechanism by  
1078 which the LIN-41 Deg domains function will illuminate whether analogous mechanisms are  
1079 employed in a developmental context.

1080

### 1081 ***Ubiquitin-mediated protein degradation and the OET***

1082 Signaling pathways and downstream kinase activation coordinate the cell-cycle and  
1083 developmental events that underpin oocyte and early embryo development. In *C. elegans* the  
1084 ERK MAP kinase signaling pathway and its effector kinase MPK-1 regulate pachytene  
1085 progression and multiple aspects of oogenesis, including oocyte growth and specific events that

1086 occur during meiotic maturation (reviewed by Arur 2017). Consistent with these phenotypes,  
1087 sustained activation of MPK-1 occurs during pachytene and in proximal oocytes (Lee *et al.*  
1088 2007). Likewise, in proximal oocytes activated cyclin-dependent kinase CDK-1 regulates an  
1089 important aspect of oocyte meiotic maturation by promoting the transition from meiotic  
1090 prophase to meiotic M phase, as we have described. Once activated, CDK-1 phosphorylates the  
1091 DYRK mini-brain kinase MBK-2 as part of an intricate regulatory mechanism that permits MBK-2  
1092 activation near the end of the first meiotic division (Pellettieri *et al.* 2003; Stitzel *et al.* 2006,  
1093 2007; Cheng *et al.* 2009; Parry *et al.* 2009). These three kinases (MPK-1, CDK-1, and MBK-2) all  
1094 function, at least in part, to promote the degradation of one or more RNA-binding proteins  
1095 during oogenesis or the OET.

1096         After meiosis, the OMA proteins are detectably phosphorylated by activated MBK-2  
1097 (Nishi and Lin 2005). Phosphorylation by MBK-2 promotes a direct physical interaction between  
1098 the OMA proteins and the transcription factor TAF-4; this permits the sequestration of TAF-4 in  
1099 the cytoplasm and prevents the premature onset of zygotic transcription (Guyen-Ozkan *et al.*  
1100 2008). Furthermore, MBK-2-dependent phosphorylation primes the OMA proteins for  
1101 phosphorylation by the glycogen synthase kinase GSK-3 and for degradation during the first  
1102 mitotic division (Nishi and Lin, 2005; Shirayama *et al.* 2006). In addition to MBK-2 and GSK-3,  
1103 the degradation of the OMA proteins requires the normal activities of additional kinases,  
1104 including CDK-1/Cyclin B3, and several proposed E3 ubiquitin ligases (Shirayama *et al.* 2006; Du  
1105 *et al.* 2015). The failure to degrade OMA-1 and eliminate it from early embryos is deleterious  
1106 (Lin *et al.* 2003) and contributes to phenotypes exhibited by mutants that fail to degrade the  
1107 OMA proteins (Shirayama *et al.* 2006). Indeed, the ectopic expression of OMA-1 in early

1108 embryos represses the translation of at least one mRNA target of the OMA proteins, *zif-1*  
1109 mRNA, but only when OMA-1 is not phosphorylated by MBK-2, as in the *oma-1(zu405gf)*  
1110 mutant (Guyen-Ozkan *et al.* 2010). Thus, the MBK-2-dependent phosphorylation of the OMA  
1111 proteins not only primes these proteins for degradation but also inhibits their ability to function  
1112 as translational repressors.

1113         Likewise, the ability of GLD-1 to function as a translational repressor might be inhibited  
1114 by MPK-1-dependent phosphorylation (Kisielnicka *et al.* 2018; this work). Since *mpk-1* activity is  
1115 also required for the elimination of GLD-1, MPK-1-dependent phosphorylation would  
1116 coordinate the inactivation of GLD-1 as a translational repressor with GLD-1 degradation.  
1117 Consistent with this hypothesis, MPK-1 promotes the phosphorylation of GLD-1 and promotes  
1118 its SCF<sup>SEL-10</sup>-mediated degradation (Kisielnicka *et al.* 2018; this work). Furthermore, this  
1119 hypothesis potentially explains why the ectopic GLD-1 expressed in *sel-10* mutant oocytes is  
1120 relatively ineffective at repressing the translation of multiple target mRNAs.

1121         In sharp contrast to OMA-1 and GLD-1, our current understanding of the regulation of  
1122 LIN-41 suggests that the inactivation of LIN-41 as a translational repressor is temporally and  
1123 molecularly distinct from its degradation. Targets of LIN-41 translational repression such as *spn-*  
1124 *4* and *meg-1* are actively translated prior to meiotic maturation and the CDK-1-dependent  
1125 elimination of LIN-41. We have not yet determined that LIN-41 is phosphorylated by CDK-1 or  
1126 any other kinase, as electrophoretic mobility changes are not reproducibly observed in *sel-10*  
1127 mutants using several gel systems (unpublished results). The fact that *spn-4* and *meg-1* mRNAs  
1128 are translated normally when *cdk-1* function is attenuated by RNAi (Tsukamoto *et al.* 2018)

1129 suggests that the CDK-1 is not required to inactivate LIN-41 as a translational repressor. In  
1130 addition, we show here that mutations affecting the function of the LIN-41 Deg domains do not  
1131 exhibit gain-of-function phenotypes or substantially repress the translation of LIN-41 target  
1132 mRNAs.

1133

### 1134 ***Multiple mechanisms regulate LIN-41 proteins***

1135 LIN-41 was first identified through its role in the heterochronic gene regulatory pathway that  
1136 controls the timing of postembryonic cell divisions and cell fate decisions in somatic cells in *C.*  
1137 *elegans* (Reinhart *et al.* 2000; Slack *et al.* 2000; reviewed by Rougvie and Moss 2013). In this  
1138 capacity, LIN-41 functions to repress the translation of several transcription factors, including  
1139 LIN-29, MAB-3, MAB-10, and DMD-3, which play key roles in specifying somatic cell fates during  
1140 the L4 and adult stages (Reinhart *et al.* 2000; Harris and Horvitz 2011; Aeschimann *et al.* 2017).  
1141 LIN-41 binds to the mRNAs of these genes and represses their translation during early larval  
1142 stages (e.g., L1–L3) (Aeschimann *et al.* 2017). The Let-7 microRNA promotes the switch from  
1143 early larval stages to the L4 and adult stages by repressing translation of LIN-41 beginning in the  
1144 L4 stage (Reinhart *et al.* 2000; Slack *et al.* 2000). This regulation is specific to the soma as the  
1145 *let-7(n2583ts)* mutation does not increase the accumulation of LIN-41 in the oogenic germline  
1146 (Spike *et al.* 2014a). It is not clear whether specific protein degradation mechanisms collaborate  
1147 with Let-7-mediated regulation to ensure that LIN-41 does not perdure from the early larval  
1148 stages into the L4 and adult stage in somatic cells. If such mechanisms exist, they are unlikely to  
1149 depend solely on the Deg domains because *lin-41* mutations affecting the Deg domains (e.g.,



1150 *tn1620, tn1622 tn1635, tn1638, tn1643, and tn1645*) do not phenocopy *let-7* mutations or  
1151 exhibit dominant somatic defects. Additionally, the Deg mutations do not confer an overt *lin-*  
1152 *41(lf)* Dpy phenotype. Further, *lin-41(tn1541tn1643[ΔDeg-A–RING–Deg-B])* L3-stage larvae do  
1153 not exhibit precocious adult alae (n=7; Ann Rougvie, personal communication) as is frequently  
1154 observed in *lin-41(n2914)* null mutants (Slack *et al.* 2000). The Deg domains mediate LIN-41  
1155 degradation during the OET over short time scales (i.e., 10–15 minutes), whereas the larval  
1156 stages last for hours. This difference may obviate a requirement for SCF<sup>SEL-10</sup>-mediated  
1157 degradation of LIN-41 during the larval stages. Interestingly, several *lin-41* gain-of-function  
1158 alleles affecting the N-terminal 39 amino acid residues result in a defect in tip retraction during  
1159 male tail development resulting in the production of a leptoderan (Lep) tail characteristic of  
1160 other rhabditid nematode species (Del Rio-Albrechtsen *et al.* 2006). These *lin-41(Lep)* gain-of-  
1161 function alleles do not affect LIN-41 degradation during the OET and thus define a site for LIN-  
1162 41 regulation in somatic cells, which could involve proteolytic degradation.

1163         LIN-41 is highly conserved. The mammalian ortholog LIN-41/TRIM71 is required for  
1164 embryonic viability and neural tube closure in mice (Maller Schulman *et al.* 2008; Cuevas *et al.*  
1165 2015; Mitschka *et al.* 2015). LIN-41/TRIM71 was found to promote reprogramming of dermal  
1166 fibroblasts to induced-pluripotent stem cells (iPSC) through the negative regulation of  
1167 differentiation genes including the transcription factor EGR1 (Worringer *et al.* 2014).  
1168 Importantly, the Let-7 microRNA inhibits reprogramming in part through the repression of LIN-  
1169 41. Thus, the regulation of LIN-41 by Let-7 is a conserved regulatory module. By contrast, the  
1170 Deg domains of *C. elegans* LIN-41 are not found in the mammalian orthologs and appear to be  
1171 rapidly evolving in closely related rhabditid nematodes.

1172            Developing systems must deploy mechanisms to extinguish RNA-binding protein-  
1173 mediated translational repression. Such mechanisms may function to promote translation of  
1174 batteries of genes needed to drive developmental transitions. LIN-41-associated mRNAs include  
1175 many key genes required for embryonic development (Tsukamoto *et al.* 2017). Thus the  
1176 inactivation of LIN-41 likely plays a key role in shaping the proteome during the OET. The  
1177 “primary” mechanism inactivating LIN-41 prior to its degradation, and its potential conservation  
1178 in LIN-41 orthologs or members of the TRIM-NHL class of RNA-binding proteins, remain to be  
1179 determined.

1180

1181

## ACKNOWLEDGMENTS

1182 We are grateful to Swathi Arur, Sarah Crittenden, Claire de la Cova, Daniel Dickinson, Bob  
1183 Goldstein, Barth Grant, Iva Greenwald, Judith Kimble, Tim Schedl, and Dustin Updike for  
1184 providing strains or reagents. We thank G. W. Gant Luxton for the use of his spinning disc  
1185 confocal microscope. Some strains were provided by the Caenorhabditis Genetics Center, which  
1186 is funded by grant P40OD010440 from the NIH Office of Research Infrastructure Programs. We  
1187 also thank WormBase for sequences and annotations. We thank Cynthia Kenyon for discussions  
1188 on GLD-1 regulation. Ann Rougvie and Todd Starich provided helpful suggestions during the  
1189 course of this work. This work was supported by NIH grant GM57173 (to D.G.).

1190

## REFERENCES

- 1191
- 1192 Aeschimann, F., P. Kumari, H. Bartake, D. Gaidatzis, L. Xu *et al.*, 2017 LIN41 post-
- 1193 transcriptionally silences mRNAs by two distinct and position-dependent mechanisms.
- 1194 Mol. Cell 65: 476–489.
- 1195 Allen, A. K., J. E. Nesmith, and A. Golden, 2014 An RNAi-based suppressor screen identifies
- 1196 interactors of the Myt1 ortholog of *Caenorhabditis elegans*. G3 4: 2329–2343.
- 1197 Arribere, J. A., R. T. Bell, B. X. Fu, K. L. Artilles, P. S. Hartman *et al.*, 2014 Efficient marker-free
- 1198 recovery of custom genetic modifications with CRISPR/Cas9 in *Caenorhabditis elegans*.
- 1199 Genetics 198: 837–846.
- 1200 Arur, S., 2017 Signaling-mediated regulation of meiotic prophase I and transition during
- 1201 oogenesis. Results Probl. Cell Differ. 59: 101–123.
- 1202 Avilés-Pagán, E. E., and T. L. Orr-Weaver, 2018 Activating embryonic development in
- 1203 *Drosophila*. Semin. Cell Dev. Biol. in press.
- 1204 Balklava, Z., S. Pant, H. Fares, and B. D. Grant, 2007 Genome-wide analysis identifies a general
- 1205 requirement for polarity proteins in endocytic traffic. Nat. Cell Biol. 9: 1066–1073.
- 1206 Barroca, V., B. Lassalle, M. Coureuil, J. P. Louis, F. Le Page *et al.*, 2009 Mouse differentiating
- 1207 spermatogonia can generate germinal stem cells *in vivo*. Nat. Cell Biol. 11: 190–196.
- 1208 Beard, S. M., R. B. Smit, B. G. Chan, and P. E. Mains, 2016 Regulation of the MEI-1/MEI-2
- 1209 microtubule-severing Katanin complex in early *Caenorhabditis elegans* Development. G3
- 1210 6: 3257–3268.
- 1211 Boag, P. R., A. Nakamura, and T. K. Blackwell, 2005 A conserved RNA-protein complex
- 1212 component involved in physiological germline apoptosis regulation in *C. elegans*.

- 1213           Development 132: 4975–4986.
- 1214   Bohnert, K. A., and C. Kenyon, 2017 A lysosomal switch triggers proteostasis renewal in the  
1215           immortal *C. elegans* germ lineage. *Nature* 551: 629–633.
- 1216   Boxem, M., D. G. Srinivasan, and S. van den Heuvel, 1999 The *Caenorhabditis elegans* gene *ncc-*  
1217           1 encodes a cdc2-related kinase required for M phase in meiotic and mitotic cell  
1218           divisions, but not for S phase. *Development* 126: 2227–2239.
- 1219   Brawley, C., and E. Matunis, 2004 Regeneration of male germline stem cells by spermatogonial  
1220           dedifferentiation *in vivo*. *Science* 304: 1331–1334.
- 1221   Burrows, A. E., B. K. Scurman, M. E. Kosinski, C. T. Richie, P. L. Sadler *et al.*, 2006 The *C. elegans*  
1222           Myt1 ortholog is required for the proper timing of oocyte maturation. *Development*  
1223           133: 697–709.
- 1224   Castilho, P. V., B. C. Williams, S., Mochida, Y. Zhao, and M. L. Goldberg, 2009 The M phase  
1225           kinase Greatwall (Gwl) promotes inactivation of PP2A/B55delta, a phosphatase directed  
1226           against CDK phosphosites. *Mol. Biol. Cell* 20: 4777–4789.
- 1227   Cheng, J., N. Türkel, N. Hemati, M. T. Fuller, A. J. Hunt, and Y. M. Yamashita, 2008 Centrosome  
1228           misorientation reduces stem cell division during aging. *Nature* 456: 599–604.
- 1229   Cheng, K. C., R. Klancer, A. Singson, and G. Seydoux, 2009 Regulation of MBK-2/DYRK by CDK-1  
1230           and the pseudophosphatases EGG-4 and EGG-5 during the oocyte-to-embryo transition.  
1231           *Cell* 139: 560–572.
- 1232   Crittenden, S. L., D. S. Bernstein, J. L. Bachorik, B. E. Thompson, M. Gallegos *et al.*, 2002 A  
1233           conserved RNA-binding protein controls germline stem cells in *Caenorhabditis elegans*.  
1234           *Nature* 417: 660–663.

- 1235 Cross, F. R., L. Schroeder, and J. M. Bean, 2007 Phosphorylation of the Sic1 inhibitor of B-type  
1236 cyclins in *Saccharomyces cerevisiae* is not essential but contributes to cell cycle  
1237 robustness. *Genetics* 176: 1541–1555.
- 1238 Csizmok, V., M. Montecchio, H. Lin, M. Tyers, M. Sunnerhagen *et al.*, 2018 Multivalent  
1239 interactions with Fbw7 and Pin1 facilitate recognition of c-Jun by the SCF<sup>Fbw7</sup> ubiquitin  
1240 ligase. *Structure* 26: 28–39.
- 1241 Cuevas, E., A. Rybak-Wolf, A. M. Rhode, D. T. T. Nguyen, and F. G. Wulczyn, 2015 Lin41/Trim71  
1242 is essential for mouse development and specifically expressed in postnatal ependymal  
1243 cells of the brain. *Front. Cell Dev. Biol.* 3: 20.
- 1244 de la Cova, C., and I. Greenwald, 2012 SEL-10/Fbw7-dependent negative feedback regulation of  
1245 LIN-45/Braf signaling in *C. elegans* via a conserved phosphodegron. *Genes Dev* 26:  
1246 2524–2535.
- 1247 Del Rio-Albrechtsen, T., K. Kiontke, S. Y. Chiou, and D. H. Fitch, 2006 Novel gain-of-function  
1248 alleles demonstrate a role for the heterochronic gene *lin-41* in *C. elegans* male tail tip  
1249 morphogenesis. *Dev. Biol.* 297: 74–86.
- 1250 Dephoure, N., K. L. Gould, S. P. Gygi, and D. R. Kellogg, 2013 Mapping and analysis of  
1251 phosphorylation sites: a quick guide for cell biologists. *Mol. Biol. Cell* 24: 535-542.
- 1252 Deshaies, R. J., and J. E. Ferrell, 2001 Multisite phosphorylation and the countdown to S phase.  
1253 *Cell* 107: 819–822.
- 1254 Detwiler, M. R., M. Reuben, X. Li, E. Rogers, and R. Lin, 2001 Two zinc finger proteins, OMA-1  
1255 and OMA-2, are redundantly required for oocyte maturation in *C. elegans*. *Dev. Cell* 1:  
1256 187–199.

- 1257 Dickinson, D. J., A. M. Pani, J. K. Heppert, C. D. Higgins, and B. Goldstein, 2015 Streamlined  
1258 genome engineering with a self-excising drug selection cassette. *Genetics* 200: 1035–  
1259 1049.
- 1260 Dickinson, D. J., J. D. Ward, D. J. Reiner, and B. Goldstein, 2013 Engineering the *Caenorhabditis*  
1261 *elegans* genome using Cas9-triggered homologous recombination. *Nat. Methods* 10:  
1262 1028–1034.
- 1263 Doh, J. H., Y. Jung, V. Reinke, and M. H. Lee, 2013 *C. elegans* RNA-binding protein GLD-1  
1264 recognizes its multiple targets using sequence, context, and structural information to  
1265 repress translation. *Worm* 2: e26548.
- 1266 Draper, B. W., C. C. Mello, B. Bowerman, J. Hardin, and J. R. Priess, 1996 MEX-3 is a KH domain  
1267 protein that regulates blastomere identity in early *C. elegans* embryos. *Cell* 87: 205–216.
- 1268 Du, Z., F. He, Z. Yu, B. Bowerman, and Z. Bao, 2015 E3 ubiquitin ligases promote progression of  
1269 differentiation during *C. elegans* embryogenesis. *Dev. Biol.* 398: 267–279.
- 1270 Dunphy, W. G., L. Brizuela, D. Beach, and J. Newport, 1988 The *Xenopus* cdc2 protein is a  
1271 component of MPF, a cytoplasmic regulator of mitosis. *Cell* 54: 423–431.
- 1272 Esposito, D., M. G. Koliopoulos, and K. Rittinger, 2017 Structural determinants of TRIM protein  
1273 function. *Biochem. Soc. Trans.* 45: 183-191.
- 1274 Farley, B. M., and S. P. Ryder, 2012 POS-1 and GLD-1 repress *glp-1* translation through a  
1275 conserved binding-site cluster. *Mol. Biol. Cell* 23: 4473–4483.
- 1276 Ferrell, J. E., Jr., 1999a *Xenopus* oocyte maturation: new lessons from a good egg. *Bioessays* 21:  
1277 833–842.
- 1278 Ferrell, J. E., Jr., 1999b Building a cellular switch: more lessons from a good egg. *Bioessays* 21:

- 1279           866–870.
- 1280   Feldman, R. M., C. C. Correll, K. B. Kaplan, and R. J. Deshaies, 1997 A complex of Cdc4p, Skp1p,  
1281           and Cdc53/cullin catalyzes ubiquitination of the phosphorylated CDK inhibitor Sic1p. *Cell*  
1282           91: 221–230.
- 1283   Félix, M.-A., and A. Wagner 2008 Robustness and evolution: concepts, insights and challenges  
1284           from a developmental model system. *Heredity* 100: 132–140.
- 1285   Fox, P. M., V. E. Vought, M. Hanazawa, M. H. Lee, E. M. Maine *et al.*, 2011 Cyclin E and CDK-2  
1286           regulate proliferative cell fate and cell cycle progression in the *C. elegans* germline.  
1287           *Development* 138: 2223–2234.
- 1288   Francis, R., M. K. Barton, J. Kimble, and T. Schedl, 1995a *gld-1*, a tumor suppressor gene  
1289           required for oocyte development in *Caenorhabditis elegans*. *Genetics* 139: 579–606.
- 1290   Francis, R., E. Maine, and T. Schedl, 1995b Analysis of the multiple roles of *gld-1* in germline  
1291           development: interactions with the sex determination cascade and the *glp-1* signaling  
1292           pathway. *Genetics* 139: 607–630.
- 1293   Frank-Vaillant, M., C. Jesus, R. Ozon, J. L. Maller, and O. Haccard, 1999 Two distinct  
1294           mechanisms control the accumulation of cyclin B1 and Mos in *Xenopus* oocytes in  
1295           response to progesterone. *Mol. Biol. Cell* 10: 3279–3288.
- 1296   Furuta, T., S. Tuck, J. Kirchner, B. Koch, R. Auty *et al.*, 2000 EMB-30: an APC4 homologue  
1297           required for metaphase-to-anaphase transitions during meiosis and mitosis in  
1298           *Caenorhabditis elegans*. *Mol. Biol. Cell* 11: 1401–1419.
- 1299   Gautier, J., C. Norbury, M. Lohka, P. Nurse, and J. Maller, 1988 Purified maturation-promoting  
1300           factor contains the product of a *Xenopus* homolog of the fission yeast cell cycle control



- 1301 gene *cdc2+*. *Cell* 54: 433–439.
- 1302 Gautier, J., J. Minshull, M. Lohka, M. Glotzer, T. Hunt *et al.*, 1990 Cyclin is a component of  
1303 maturation-promoting factor from *Xenopus*. *Cell* 60: 487–494.
- 1304 Gomes, J. E., S. E. Encalada, K. A. Swan, C. A. Shelton, J. C. Carter *et al.*, 2001 The maternal gene  
1305 *spn-4* encodes a predicted RRM protein required for mitotic spindle orientation and cell  
1306 fate patterning in early *C. elegans* embryos. *Development* 128: 4301–4314.
- 1307 Gouw, M., S. Michael, H. Sámano-Sánchez, M. Kumar, A. Zeke *et al.*, 2018 The eukaryotic linear  
1308 motif resource - 2018 update. *Nucleic Acids Res.* 46: D428–D434.
- 1309 Govindan, J. A., H. Cheng, J. E. Harris, and D. Greenstein, 2006 Galphao/i and Galphas signaling  
1310 function in parallel with the MSP/Eph receptor to control meiotic diapause in *C. elegans*.  
1311 *Curr. Biol.* 16: 1257–1268.
- 1312 Govindan, J. A., S. Nadarajan, S. Kim, T. A. Starich, and D. Greenstein, 2009 Somatic cAMP  
1313 signaling regulates MSP-dependent oocyte growth and meiotic maturation in *C. elegans*.  
1314 *Development* 136: 2211–2221.
- 1315 Grant, B., and D. Hirsh, 1999 Receptor-mediated endocytosis in the *Caenorhabditis elegans*  
1316 oocyte. *Mol. Biol. Cell* 10: 4311–4326.
- 1317 Guven-Ozkan, T., Y. Nishi, S. M. Robertson, and R. Lin, 2008 Global transcriptional repression in  
1318 *C. elegans* germline precursors by regulated sequestration of TAF-4. *Cell* 135: 149–160.
- 1319 Haccard, O., and C. Jesus, 2006a Redundant pathways for Cdc2 activation in *Xenopus* oocyte:  
1320 either cyclin B or Mos synthesis. *EMBO Rep.* 7: 321–325.
- 1321 Haccard, O., and C. Jesus, 2006b Oocyte maturation, Mos and cyclins—a matter of synthesis:  
1322 two functionally redundant ways to induce meiotic maturation. *Cell Cycle* 5: 1152–1159.

- 1323 Hammerstein, P., E. H. Hagen, A. V. M. Hertz, and H. Herzel, 2006 Robustness: a key to  
1324 evolutionary design. *Biological Theory* 1: 90–93.
- 1325 Hansen, D., L. Wilson-Berry, T. Dang, and T. Schedl, 2004 Control of the proliferation versus  
1326 meiotic development decision in the *C. elegans* germline through regulation of GLD-1  
1327 protein accumulation. *Development* 131: 93–104.
- 1328 Harris, D. T., and H. R. Horvitz, 2011 MAB-10/NAB acts with LIN-29/EGR to regulate terminal  
1329 differentiation and the transition from larva to adult in *C. elegans*. *Development* 138:  
1330 4051–4062.
- 1331 Hasegawa, E., T. Karashima, E. Sumiyoshi, and M. Yamamoto, 2006 *C. elegans* CPB-3 interacts  
1332 with DAZ-1 and functions in multiple steps in germline development. *Dev. Biol.* 295:  
1333 689–699.
- 1334 Huelgas-Morales, G., and D. Greenstein, 2017 Control of oocyte meiotic maturation in *C.*  
1335 *elegans*. *Semin. Cell Dev. Biol.*, in press.
- 1336 Hopkins, M., J. J. Tyson, and B. Novák, 2017 Cell-cycle transitions: a common role for  
1337 stoichiometric inhibitors. *Mol. Biol. Cell* 28: 3437–3446.
- 1338 Hsu, J. Y., Z. W. Sun, X. Li, M. Reuben, K. Tatchell *et al.*, 2000 Mitotic phosphorylation of histone  
1339 H3 is governed by Ipl1/aurora kinase and Glc7/PP1 phosphatase in budding yeast and  
1340 nematodes. *Cell* 102: 279–291.
- 1341 Ikeda, K., and S. Inoue, 2012 TRIM proteins as RING finger E3 ubiquitin ligases. *Adv. Exp. Med.*  
1342 *Biol.* 770: 27–37.
- 1343 Jan, E., C. K. Motzny, L. E. Graves, and E. B. Goodwin, 1999 The STAR protein, GLD-1, is a

- 1344 translational regulator of sexual identity in *Caenorhabditis elegans*. EMBO J. 18: 258–  
1345 269.
- 1346 Jeong, J., J. M. Verheyden, and J. Kimble, 2011 Cyclin E and Cdk2 control GLD-1, the  
1347 mitosis/meiosis decision, and germline stem cells in *Caenorhabditis elegans*. PLoS  
1348 Genet. 7: e1001348.
- 1349 Jones, A. R., R. Francis, and T. Schedl, 1996 GLD-1, a cytoplasmic protein essential for oocyte  
1350 differentiation, shows stage- and sex-specific expression during *Caenorhabditis elegans*  
1351 germline development. Dev. Biol. 180: 165–183.
- 1352 Jones, A. R., and T. Schedl, 1995 Mutations in *gld-1*, a female germ cell-specific tumor  
1353 suppressor gene in *Caenorhabditis elegans*, affect a conserved domain also found in Src-  
1354 associated protein Sam68. Genes Dev. 9: 1491–1504.
- 1355 Jungkamp, A. C., M. Stoeckius, D. Mecnas, D. Grün, G. Mastrobuoni *et al.*, 2011 *In vivo* and  
1356 transcriptome-wide identification of RNA binding protein target sites. Mol. Cell 44: 828–  
1357 840.
- 1358 Jäger, S., H. T. Schwartz, H. R. Horvitz, and B. Conradt, 2004 The *Caenorhabditis elegans* F-box  
1359 protein SEL-10 promotes female development and may target FEM-1 and FEM-3 for  
1360 degradation by the proteasome. Proc. Natl. Acad. Sci. U S A 101: 12549–12554.
- 1361 Kadyk, L. C., and J. Kimble, 1998 Genetic regulation of entry into meiosis in *Caenorhabditis*  
1362 *elegans*. Development 125: 1803–1813.
- 1363 Kai, T., and Spradling A., 2004 Differentiating germ cells can revert into functional stem cells in  
1364 *Drosophila melanogaster* ovaries. Nature 428: 564–569.
- 1365 Kapelle, W. S., and V. Reinke, 2011 *C. elegans meg-1* and *meg-2* differentially interact with

- 1366 nanos family members to either promote or inhibit germ cell proliferation and survival.  
1367 Genesis 49: 380–391.
- 1368 Killian, D. J., E. Harvey, P. Johnson, M. Otori, S. Mitani *et al.*, 2008 SKR-1, a homolog of Skp1 and  
1369 a member of the SCF(SEL-10) complex, regulates sex-determination and LIN-12/Notch  
1370 signaling in *C. elegans*. Dev. Biol. 322: 322–331.
- 1371 Kim, M. Y., E. Bucciarelli, D. G. Morton, B. C. Williams, K. Blake-Hodek *et al.*, 2012 Bypassing the  
1372 Greatwall-Endosulfine pathway: plasticity of a pivotal cell-cycle regulatory module in  
1373 *Drosophila* and *Caenorhabditis elegans*. Genetics 191: 1181–1197.
- 1374 Kipreos, E. T., S. P. Gohel, and E. M. Hedgecock, 2000 The *C. elegans* F-box/WD-repeat protein  
1375 LIN-23 functions to limit cell division during development. Development 127: 5071–  
1376 5082.
- 1377 Kipreos, E. T., L. E. Lander, J. P. Wing, W. W. He, and E. M. Hedgecock, 1996 *cul-1* is required for  
1378 cell cycle exit in *C. elegans* and identifies a novel gene family. Cell 85: 829–839.
- 1379 Kishimoto, T., 2015 Entry into mitosis: a solution to the decades-long enigma of MPF.  
1380 Chromosoma 124: 417–428.
- 1381 Kisielnicka, E., R. Minasaki, and C. R. Eckmann, 2018 MAPK signaling couples SCF-mediated  
1382 degradation of translational regulators to oocyte meiotic progression. Proc. Natl. Acad.  
1383 Sci. U S A 115: E2772–E2781.
- 1384 Kobayashi, H., J. Minshull, C. Ford, R. Golsteyn, R. Poon *et al.*, 1991 On the synthesis and  
1385 destruction of A- and B-type cyclins during oogenesis and meiotic maturation in *Xenopus*  
1386 *laevis*. J. Cell Biol. 114: 755–765.
- 1387 Kõivomägi, M., E. Valk, R. Venta, A. Iofik, M. Lepiku *et al.*, 2011 Cascades of multisite

- 1388 phosphorylation control Sic1 destruction at the onset of S phase. *Nature* 480: 128–131.
- 1389 Kornbluth, S., B. Sebastian, T. Hunter, and J. Newport, 1994 Membrane localization of the  
1390 kinase which phosphorylates p34cdc2 on threonine 14. *Mol. Biol. Cell* 5: 273–282.
- 1391 Kosinski, M., K. McDonald, J. Schwartz, I. Yamamoto, and D. Greenstein, 2005 *C. elegans* sperm  
1392 bud vesicles to deliver a meiotic maturation signal to distant oocytes. *Development* 132:  
1393 3357–3369.
- 1394 Kumagai, A., and W. G. Dunphy, 1996 Purification and molecular cloning of Plx1, a Cdc25-  
1395 regulatory kinase from *Xenopus* egg extracts. *Science* 273:1377–1380.
- 1396 Kumari, P., F. Aeschmann, D. Gaidatzis, J. J. Keusch, P. Ghosh *et al.*, 2018 Evolutionary plasticity  
1397 of the NHL domain underlies distinct solutions to RNA recognition. *Nat. Commun.* 9:  
1398 1549.
- 1399 Kumsta, C., and M. Hansen, 2012 *C. elegans rrf-1* mutations maintain RNAi efficiency in the  
1400 soma in addition to the germline. *PLoS One* 7: e35428.
- 1401 Leacock, S. W., and V. Reinke, 2008 MEG-1 and MEG-2 are embryo-specific P-granule  
1402 components required for germline development in *Caenorhabditis elegans*. *Genetics*  
1403 178: 295–306.
- 1404 Lee, M. H., M. Ohmachi, S. Arur, S. Nayak, R. Francis *et al.*, 2007 Multiple functions and dynamic  
1405 activation of MPK-1 extracellular signal-regulated kinase signaling in *Caenorhabditis*  
1406 *elegans* germline development. *Genetics* 177: 2039–2062.
- 1407 Lee, M. H., and T. Schedl, 2001 Identification of in vivo mRNA targets of GLD-1, a maxi-KH motif  
1408 containing protein required for *C. elegans* germ cell development. *Genes Dev.* 15: 2408–  
1409 2420.

- 1410 Lee, M. H., and T. Schedl, 2004 Translation repression by GLD-1 protects its mRNA targets from  
1411 nonsense-mediated mRNA decay in *C. elegans*. *Genes Dev.* 18: 1047–1059.
- 1412 Lee, M. H., and T. Schedl, 2010 *C. elegans* star proteins, GLD-1 and ASD-2, regulate specific RNA  
1413 targets to control development. *Adv. Exp. Med. Biol.* 693: 106–122.
- 1414 Li, W., L. R. DeBella, T. Guven-Ozkan, R. Lin, and L. S. Rose, 2009 An eIF4E-binding protein  
1415 regulates katanin protein levels in *C. elegans* embryos. *J. Cell Biol.* 187: 33–42.
- 1416 Lin, R., 2003 A gain-of-function mutation in *oma-1*, a *C. elegans* gene required for oocyte  
1417 maturation, results in delayed degradation of maternal proteins and embryonic  
1418 lethality. *Dev. Biol.* 258: 226–239.
- 1419 Loedige, I., D. Gaidatzis, R. Sack, G. Meister, and W. Filipowicz, 2013 The mammalian TRIM-NHL  
1420 protein TRIM71/LIN-41 is a repressor of mRNA function. *Nucleic Acids Res.* 41: 518–532.
- 1421 Loedige, I., L. Jakob, T. Treiber, D. Ray, M. Stotz *et al.*, 2015 The crystal structure of the NHL  
1422 domain in complex with RNA reveals the molecular basis of *Drosophila brain-tumor*-  
1423 mediated gene regulation. *Cell Rep.* 13: 1206–1220.
- 1424 Lohka, M. J., M. K. Hayes, and J. L. Maller, 1988 Purification of maturation-promoting factor, an  
1425 intracellular regulator of early mitotic events. *Proc. Natl. Acad. Sci. U S A* 85: 3009–3013.
- 1426 Lucas, X., and A. Ciulli, 2017 Recognition of substrate degrons by E3 ubiquitin ligases and  
1427 modulation by small-molecule mimicry strategies. *Curr. Opin. Struct. Biol.* 44: 101–110.
- 1428 Maller Schulman, B. R., X. Liang, C. Stahlhut, C. DelConte, G. Stefani *et al.*, 2008 The *let-7*  
1429 microRNA target gene, *Mlin41/Trim71* is required for mouse embryonic survival and  
1430 neural tube closure. *Cell Cycle* 7: 3935–3942.
- 1431 Masui, Y., 2001 From oocyte maturation to the *in vitro* cell cycle: the history of discoveries of

- 1432 Maturation-Promoting Factor (MPF) and Cytostatic Factor (CSF). *Differentiation* 69: 1–  
1433 17.
- 1434 Masui, Y., and C. L. Markert, 1971 Cytoplasmic control of nuclear behavior during meiotic  
1435 maturation of frog oocytes. *J. Exp. Zool.* 177: 129–145.
- 1436 Matsuura, R., T. Ashikawa, Y. Nozaki, and D. Kitagawa, 2016 LIN-41 inactivation leads to delayed  
1437 centrosome elimination and abnormal chromosome behavior during female meiosis in  
1438 *Caenorhabditis elegans*. *Mol. Biol. Cell* 27: 799–811.
- 1439 McCarter, J., B. Bartlett, T. Dang, and T. Schedl, 1999 On the control of oocyte meiotic  
1440 maturation and ovulation in *Caenorhabditis elegans*. *Dev. Biol.* 205: 111–128.
- 1441 McNally, K., A. Audhya, K. Oegema, and F. J. McNally, 2006 Katanin controls mitotic and meiotic  
1442 spindle length. *J. Cell Biol.* 175: 881–891.
- 1443 Merritt, C., D. Rasoloson, D. Ko and, G. Seydoux, 2008 3' UTRs are the primary regulators of  
1444 gene expression in the *C. elegans* germline. *Curr. Biol.* 18: 1476–1482.
- 1445 Miller, M. A., V. Q. Nguyen, M. H. Lee, M. Kosinski, T. Schedl *et al.*, 2001 A sperm cytoskeletal  
1446 protein that signals oocyte meiotic maturation and ovulation. *Science* 291: 2144–2147.
- 1447 Minshull, J., A. Murray, A. Colman, and T. Hunt, 1991 *Xenopus* oocyte maturation does not  
1448 require new cyclin synthesis. *J. Cell Biol.* 114: 767–772.
- 1449 Mitschka, S., T. Ulas, T. Goller, K. Schneider, A. Egert *et al.*, 2015 Co-existence of intact stemness  
1450 and priming of neural differentiation programs in mES cells lacking Trim71. *Sci. Rep.* 5:  
1451 11126.
- 1452 Mochida, S., S. L. Maslen, M. Skehel, and T. Hunt, 2010 Greatwall phosphorylates an inhibitor of  
1453 protein phosphatase 2A that is essential for mitosis. *Science* 330:1670–1673.

- 1454 Mohammad, A., K. Vanden Broek, C. Wang, A. Daryabeigi, V. Jantsch *et al.*, 2018 Initiation of  
1455 meiotic development is controlled by three posttranscriptional pathways in  
1456 *Caenorhabditis elegans*. Genetics in press.
- 1457 Mootz, D., D. M. Ho, and C. P. Hunter, 2004 The STAR/Maxi-KH domain protein GLD-1 mediates  
1458 a developmental switch in the translational control of *C. elegans* PAL-1. Development  
1459 131: 3263–3272.
- 1460 Mueller, P. R., T. R. Coleman, and W. G. Dunphy, 1995 Cell cycle regulation of a *Xenopus* Wee1-  
1461 like kinase. Mol Biol Cell 6: 119–134. Murray, A. W., M. J. Solomon, and M. W. Kirschner,  
1462 1989 The role of cyclin synthesis and degradation in the control of maturation  
1463 promoting factor activity. Nature 339: 280–286.
- 1464 Nakagawa, T., M. Sharma, Y. Nabeshima, R. E. Braun, and S. Yoshida, 2010 Functional hierarchy  
1465 and reversibility within the murine spermatogenic stem cell compartment. Science 328:  
1466 62–67.
- 1467 Nakagawa, T., Y. Nabeshima, and S. Yoshida, 2007 Functional identification of the actual and  
1468 potential stem cell compartments in mouse spermatogenesis. Dev. Cell 12: 195–206.
- 1469 Nakayama, K. I., and K. Nakayama, 2005 Regulation of the cell cycle by SCF-type ubiquitin  
1470 ligases. Semin. Cell Dev. Biol. 16: 323–333.
- 1471 Nash, P., X. Tang, S. Orlicky, Q. Chen, F. B. Gertler *et al.*, 2001 Multisite phosphorylation of a  
1472 CDK inhibitor sets a threshold for the onset of DNA replication. Nature 414: 514–521.
- 1473 Nayak, S., F. E. Santiago, H. Jin, D. Lin, T. Schedl *et al.*, 2002 The *Caenorhabditis elegans* Skp1-  
1474 related gene family: diverse functions in cell proliferation, morphogenesis, and meiosis.  
1475 Curr. Biol. 12: 277–287.



- 1476 Nebreda, A. R., J. V. Gannon, and T. Hunt, 1995 Newly synthesized protein(s) must associate  
1477 with p34cdc2 to activate MAP kinase and MPF during progesterone-induced maturation  
1478 of *Xenopus* oocytes. *EMBO J.* 14: 5597–5607.
- 1479 Nishi, Y., and R. Lin, 2005 DYRK2 and GSK-3 phosphorylate and promote the timely degradation  
1480 of OMA-1, a key regulator of the oocyte-to-embryo transition in *C. elegans*. *Dev. Biol.*  
1481 288: 139–149.
- 1482 Nugroho, T. T., and M. D. Mendenhall, 1994 An inhibitor of yeast cyclin-dependent protein  
1483 kinase plays an important role in ensuring the genomic integrity of daughter cells. *Mol.*  
1484 *Cell. Biol.* 14: 3320–3328.
- 1485 Nurse, P., 1990 Universal control mechanism regulating onset of M-phase. *Nature* 344: 503–  
1486 508.
- 1487 Nyström, J., Z. Z. Shen, M. Aili, A. J. Flemming, A. Leroi *et al.*, 2002 Increased or decreased levels  
1488 of *Caenorhabditis elegans lon-3*, a gene encoding a collagen, cause reciprocal changes in  
1489 body length. *Genetics* 161: 83–97.
- 1490 O'Farrell, P. H., 2001 Triggering the all-or-nothing switch into mitosis. *Trends Cell Biol.* 11: 512–  
1491 519.
- 1492 Ogura, K., N. Kishimoto, S. Mitani, K. Gengyo-Ando, and Y. Kohara, 2003 Translational control of  
1493 maternal *glp-1* mRNA by POS-1 and its interacting protein SPN-4 in *Caenorhabditis*  
1494 *elegans*. *Development* 130: 2495–2503.
- 1495 Parry, J. M., N. V. Velarde, A. J. Lefkovith, M. H. Zegarek, J. S. Hang *et al.*, 2009 EGG-4 and EGG-5  
1496 link events of the oocyte-to-embryo transition with meiotic progression in *C. elegans*.  
1497 *Curr. Biol.* 19: 1752–1757.

- 1498 Peel, N., M. Dougherty, J. Goeres, Y. Liu, and K. F. O'Connell, 2012 The *C. elegans* F-box proteins  
1499 LIN-23 and SEL-10 antagonize centrosome duplication by regulating ZYG-1 levels. *J. Cell*  
1500 *Sci.* 125: 3535–3544.
- 1501 Pellettieri, J., V. Reinke, S. K. Kim, and G. Seydoux, 2003 Coordinate activation of maternal  
1502 protein degradation during the egg-to-embryo transition in *C. elegans*. *Dev. Cell* 5: 451–  
1503 462.
- 1504 Prince, V. E., and F. B. Pickett, 2002 Splitting pairs: the diverging fates of duplicated genes. *Nat.*  
1505 *Rev. Genet.* 3: 827–837.
- 1506 Reinhart, B. J., F. J. Slack, M. Basson, A. E. Pasquinelli, J. C. Bettinger *et al.*, 2000 The 21-  
1507 nucleotide *let-7* RNA regulates developmental timing in *Caenorhabditis elegans*. *Nature*  
1508 403: 901–906.
- 1509 Robertson, S., and R. Lin, 2015 The maternal-to-zygotic transition in *C. elegans*. *Curr. Top. Dev.*  
1510 *Biol.* 113: 1–42.
- 1511 Rose, K. L., V. P. Winfrey, L. H. Hoffman, D. H. Hall, T. Furuta *et al.*, 1997 The POU gene *ceh-18*  
1512 promotes gonadal sheath cell differentiation and function required for meiotic  
1513 maturation and ovulation in *Caenorhabditis elegans*. *Dev. Biol.* 192: 59–77.
- 1514 Rougvie, A. E., and E. G. Moss, 2013 Developmental transitions in *C. elegans* larval stages. *Curr.*  
1515 *Top. Dev. Biol.* 105: 153–180,
- 1516 Rybak, A., H. Fuchs, K. Hadian, L. Smirnova, E. A. Wulczyn *et al.*, 2009 The *let-7* target gene  
1517 mouse *lin-41* is a stem cell specific E3 ubiquitin ligase for the miRNA pathway protein  
1518 Ago2. *Nat. Cell. Biol.* 11: 1411–1420.
- 1519 Scheckel, C., D. Gaidatzis, J. E. Wright, and R. Ciosk, 2012 Genome-wide analysis of GLD-1-

- 1520 mediated mRNA regulation suggests a role in mRNA storage. PLoS Genet. 8: e1002742.
- 1521 Schumacher, B., M. Hanazawa, M. H. Lee, S. Nayak, K. Volkmann *et al.*, 2005 Translational  
1522 repression of *C. elegans* p53 by GLD-1 regulates DNA damage-induced apoptosis. Cell  
1523 120: 357–368.
- 1524 Schumacher, J. M., A. Golden, and P. J. Donovan, 1998 AIR-2: An Aurora/Ipl1-related protein  
1525 kinase associated with chromosomes and midbody microtubules is required for polar  
1526 body extrusion and cytokinesis in *Caenorhabditis elegans* embryos. J. Cell Biol. 143:  
1527 1635–1646.
- 1528 Shirayama, M., M. C. Soto, T. Ishidate, S. Kim, K. Nakamura *et al.*, 2006 The conserved kinases  
1529 CDK-1, GSK-3, KIN-19, and MBK-2 promote OMA-1 destruction to regulate the oocyte-  
1530 to-embryo transition in *C. elegans*. Curr. Biol. 16: 47–55.
- 1531 Schwob, E., T. Böhm, M. D. Mendenhall, and K. Nasmyth, 1994 The B-type cyclin kinase  
1532 inhibitor p40<sup>SIC1</sup> controls the G1 to S transition in *S. cerevisiae*. Cell 79: 233–244.
- 1533 Sijen, T., J. Fleenor, F. Simmer, K. L. Thijssen, S. Parrish *et al.*, 2001 On the role of RNA  
1534 amplification in dsRNA-triggered gene silencing. Cell 107: 465–476.
- 1535 Slack, F. J., M. Basson, Z. Liu, V. Ambros, H. R. Horvitz *et al.*, 2000 The *lin-41* RBCC gene acts in  
1536 the *C. elegans* heterochronic pathway between the *let-7* regulatory RNA and the LIN-29  
1537 transcription factor. Mol. Cell 5: 659–669.
- 1538 Slack, F. J., and G. Ruvkun, 1998 A novel repeat domain that is often associated with RING finger  
1539 and B-box motifs. Trends Biochem. Sci. 23: 474–475.
- 1540 Sonnevile, R., M. Querenet, A. Craig, A. Gartner, and J. J. Blow, 2012 The dynamics of  
1541 replication licensing in live *Caenorhabditis elegans* embryos. J. Cell Biol. 196: 233–246.

- 1542 Spike, C. A., D. Coetzee, C. Eichten, X. Wang, D. Hansen *et al.*, 2014a The TRIM-NHL protein LIN-  
1543 41 and the OMA RNA-binding proteins antagonistically control the prophase-to-  
1544 metaphase transition and growth of *Caenorhabditis elegans* oocytes. *Genetics* 198:  
1545 1535–1558.
- 1546 Spike, C. A., D. Coetzee, Y. Nishi, T. Guven-Ozkan, M. Oldenbroek *et al.*, 2014b Translational  
1547 control of the oogenic program by components of OMA ribonucleoprotein particles in  
1548 *Caenorhabditis elegans*. *Genetics* 198: 1513–1533.
- 1549 Stitzel, M. L., K. C. Cheng, and G. Seydoux, 2007 Regulation of MBK-2/Dyrk kinase by dynamic  
1550 cortical anchoring during the oocyte-to-zygote transition. *Curr. Biol.* 17: 1545–1554.
- 1551 Stitzel, M. L., J. Pellettieri, and G. Seydoux, 2006 The *C. elegans* DYRK kinase MBK-2 marks  
1552 oocyte proteins for degradation in response to meiotic maturation. *Curr. Biol.* 16: 56–  
1553 62.
- 1554 Suzuki, Y., G. A. Morris, M. Han, and W. B. Wood, 2002 A cuticle collagen encoded by the *lon-3*  
1555 gene may be a target of TGF-beta signaling in determining *Caenorhabditis elegans* body  
1556 shape. *Genetics* 162: 1631–1639.
- 1557 Svoboda, P., H. Fulka, and R. Malik, 2017 Clearance of parental products. *Adv. Exp. Med. Biol.*  
1558 953: 489–535.
- 1559 Timmons, L., and A. Fire, 1998 Specific interference by ingested dsRNA. *Nature* 395: 854.
- 1560 Tocchini, C., J. J. Keusch, S. B. Miller, S. Finger, H. Gut *et al.*, 2014 The TRIM-NHL protein LIN-41  
1561 controls the onset of developmental plasticity in *Caenorhabditis elegans*. *PLoS Genet.*  
1562 10: e1004533.
- 1563 Tsukamoto, T., M. D. Gearhart, C. A. Spike, G. Huelgas-Morales, M. Mews *et al.*, 2017 LIN-41

1564 and OMA ribonucleoprotein complexes mediate a translational repression-to-activation  
1565 switch controlling oocyte meiotic maturation and the oocyte-to-embryo transition in  
1566 *Caenorhabditis elegans*. *Genetics* 206: 2007–2039.

1567 Ubersax, J. A., E. L. Woodbury, P. N. Quang, M. Paraz, J. D. Blethrow *et al.*, 2003 Targets of the  
1568 cyclin-dependent kinase Cdk1. *Nature* 425: 859–864.

1569 van der Voet, M., M. A. Lorson, D. G. Srinivasan, K. L. Bennett, and S. van den Heuvel, 2009 *C.*  
1570 *elegans* mitotic cyclins have distinct as well as overlapping functions in chromosome  
1571 segregation. *Cell Cycle* 8: 4091–4102.

1572 Vavouri, T., J. I. Semple, and B. Lehner, 2008 Widespread conservation of genetic redundancy  
1573 during a billion years of eukaryotic evolution. *Trends Genet.* 24: 485–488.

1574 Verlhac, M. H., M. E. Terret, and L. Pintard, 2010 Control of the oocyte-to-embryo transition by  
1575 the ubiquitin-proteolytic system in mouse and *C. elegans*. *Curr. Opin. Cell Biol.* 22: 758–  
1576 763.

1577 Verma, R., R. S. Annan, M. J. Huddleston, S. A. Carr, G. Reynard *et al.*, 1997 Phosphorylation of  
1578 Sic1p by G<sub>1</sub> Cdk required for its degradation and entry into S phase. *Science* 278: 455–  
1579 460.

1580 Von Stetina, J. R., S. Tranguch, S. K. Dey, L. A. Lee, B. Cha *et al.*, 2008) alpha-Endosulfine is a  
1581 conserved protein required for oocyte meiotic maturation in *Drosophila*. *Development*  
1582 135: 3697–3706.

1583 Wang, J. T., J. Smith, B. C. Chen, H. Schmidt, D. Rasoloson *et al.*, 2014 Regulation of RNA granule  
1584 dynamics by phosphorylation of serine-rich, intrinsically disordered proteins in *C.*  
1585 *elegans*. *Elife* 3: e04591.

- 1586 Welcker, M., and B. E. Clurman, 2008 FBW7 ubiquitin ligase: a tumour suppressor at the  
1587 crossroads of cell division, growth and differentiation. *Nat Rev Cancer* 8: 83–93.
- 1588 Wolke, U., E. A. Jezuit, and J. R. Priess, 2007 Actin-dependent cytoplasmic streaming in *C.*  
1589 *elegans* oogenesis. *Development* 134: 2227–2236.
- 1590 Wright, J. E., D. Gaidatzis, M. Senften, B. M. Farley, E. Westhof *et al.*, 2011 A quantitative RNA  
1591 code for mRNA target selection by the germline fate determinant GLD-1. *EMBO J.* 30:  
1592 533–545.
- 1593 Worringer, K. A., T. A. Rand, Y. Hayashi, S. Sami, K. Takahashi *et al.*, 2014 The *let-7/LIN-41*  
1594 pathway regulates reprogramming to human induced pluripotent stem cells by  
1595 controlling expression of prodifferentiation genes. *Cell Stem Cell* 14: 40–52.
- 1596 Yamanaka, A., M. Yada, H. Imaki, M. Koga, Y. Ohshima *et al.*, 2002 Multiple Skp1-related  
1597 proteins in *Caenorhabditis elegans*: diverse patterns of interaction with Cullins and F-  
1598 box proteins. *Curr. Biol.* 12: 267–275.
- 1599 Yang, X., K.-Y. Lau, V. Sevim, and C. Tang, 2013 Design principles of the yeast G1/S switch. *PLoS*  
1600 *Biol.* 11: e1001673.
- 1601 Yu, J., Y. Zhao, Z. Li, S. Galas, and M. L. Goldberg, 2006 Greatwall kinase participates in the Cdc2  
1602 autoregulatory loop in *Xenopus* egg extracts. *Mol Cell* 22: 83–91.
- 1603 Zhao, Y., O. Haccard, R. Wang, J. Yu, J. Kuang *et al.*, 2008 Roles of Greatwall kinase in the  
1604 regulation of cdc25 phosphatase. *Mol. Biol. Cell* 19: 1317–1327.
- 1605

1606

TABLES

1607 **Table 1 Fertility and fecundity of *lin-41* alleles at 20°C**

| GENOTYPE                                  | PREDICTED<br>PROTEIN<br>CHANGE         | FERTILE<br>(%) <sup>a</sup> | BROOD<br>SIZE <sup>b</sup>     | DEAD<br>EMBRYOS<br>(%) <sup>c</sup> |
|-------------------------------------------|----------------------------------------|-----------------------------|--------------------------------|-------------------------------------|
| <i>lin-41(tn1541)</i>                     | N-terminal<br>GFP                      | 100<br>(n=68)               | 316 ± 39 <sup>d</sup><br>(n=6) | 0.3<br>(n=361)                      |
| <i>lin-41(tn1541tn1618)<sup>e,f</sup></i> | Δ NHL<br>(AA 819-1128)                 | 1.5<br>(n=65)               | 1<br>(n=1)                     | ND                                  |
| <i>lin-41(tn1541tn1571)<sup>e,f</sup></i> | Δ Ig<br>(AA 677-824)                   | 78.5<br>(n=65)              | 11 ± 12<br>(n=9)               | 57.1 <sup>g</sup><br>(n=35)         |
| <i>lin-41(tn1541tn1562)<sup>e,f</sup></i> | Δ Bbox-CC<br>(AA 356-707) <sup>h</sup> | 84<br>(n=87)                | 6 ± 3<br>(n=17)                | ND                                  |
| <i>lin-41(tn1541tn1643)<sup>e</sup></i>   | Δ N-terminal<br>(AA 40-356)            | 66<br>(n=90)                | 6 ± 4<br>(n=48)                | 75.4 <sup>g</sup><br>(n=142)        |
| <i>lin-41(tn1541tn1620)<sup>e</sup></i>   | Δ N-terminal<br>(AA 40-205)            | 97<br>(n=67)                | 39 ± 32<br>(n=10)              | 36.4 <sup>g</sup><br>(n=110)        |
| <i>lin-41(tn1541tn1622)<sup>e</sup></i>   | Δ Deg-B2<br>(AA 206-356)               | 100<br>(n=65)               | 33 ± 16<br>(n=6)               | 39.0 <sup>g</sup><br>(n=105)        |
| <i>lin-41(tn1541tn1635)</i>               | Δ Deg-B1<br>(AA 162-205)               | 100<br>(n=70)               | 127 ± 108<br>(n=10)            | 2.9<br>(n=105)                      |
| <i>lin-41(tn1541tn1630)</i>               | Δ RING                                 | 98.5                        | 210 ± 87                       | 2.8                                 |

|                             |              |         |           |         |
|-----------------------------|--------------|---------|-----------|---------|
|                             | (AA 113-161) | (n=65)  | (n=12)    | (n=144) |
| <i>lin-41(tn1541tn1638)</i> | Δ Deg-A      | 100     | 217 ± 103 | 6.3     |
|                             | (AA 40-112)  | (n=70)  | (n=10)    | (n=174) |
| <i>lin-41(tn1541tn1645)</i> | T83A         | 100     | 251 ± 86  | 1.0     |
|                             |              | (n=70)  | (n=10)    | (n=193) |
| <i>lin-41(tn1767)</i>       | T83A         | 98.3    | 313 ± 31  | 0.0     |
|                             |              | (n=120) | (n=6)     | (n=176) |

1608 <sup>a</sup> Fertile animals produced at least 1 viable offspring.

1609 <sup>b</sup> The average number of progeny that hatched from fertile animals ± the standard  
1610 deviation.

1611 <sup>c</sup> The percent lethality among the embryos laid on Day 1 of adulthood.

1612 <sup>d</sup> Essentially identical to the *lin-41(tn1541)* brood size previously reported in Spike *et al.*  
1613 2014 (319 ± 28 (n=30)).

1614 <sup>e</sup> The progeny of *lin-41/hT2[qIs48]* hermaphrodites.

1615 <sup>f</sup> These animals have a dumpy (Dpy) body shape, as previously described for *lin-41(lf)*  
1616 alleles (Slack *et al.* 2000).

1617 <sup>g</sup> Some of the embryos laid were small or otherwise appeared to be abnormal.

1618 <sup>h</sup> The minimum number of amino acids removed by *tn1562*. Assuming the use of an in-  
1619 frame 5' splice site in the 17-bp insertion, either one amino acid (L) or five amino acids  
1620 (LSPLL) would replace amino acids 356-707.



1621 **Table 2 Sterility and embryonic lethality in *oma-2* and *oma-1*; *oma-2* mutant**  
 1622 **strains at 20°C**

| Genotype                                                                            | Embryos laid <sup>a</sup> | Dead embryos (%)           |
|-------------------------------------------------------------------------------------|---------------------------|----------------------------|
| <i>oma-2(cp145)</i>                                                                 | 314 ± 48 (n=6)            | 0.6 (n=1793)               |
| <i>oma-2(tn1760)</i>                                                                | 306 ± 39 (n=6)            | 0.6 (n=1835)               |
| <i>oma-2(tn1764)</i>                                                                | 300 ± 45 (n=6)            | 2.1 (n=1797)               |
| <i>oma-2(tn1764) lon-3(e2175) sel-10(ar41)</i>                                      | 288 ± 26 (n=6)            | 1.1 (n=1727)               |
| <i>oma-1(zu405te33)</i>                                                             | 261 ± 18 (n=6)            | 0.8 (n=1568)               |
| <i>oma-1(zu405te33); oma-2(te51) M+Z<sup>-b</sup></i>                               | 0 (n>21) <sup>c</sup>     | NA                         |
| <i>oma-1(zu405te33); oma-2(cp145)</i>                                               | 212 ± 29 (n=12)           | 12.3 <sup>d</sup> (n=2516) |
| <i>oma-1(zu405te33); oma-2(tn1760)</i>                                              | 224 ± 35 (n=6)            | 60.3 (n=1341)              |
| <i>oma-1(zu405te33); oma-2(tn1764) M+Z<sup>-b,e</sup></i>                           | 249 ± 29 (n=5)            | 100 (n>1256)               |
| <i>oma-1(zu405te33); oma-2(tn1764) lon-3(e2175) sel-10(ar41) M+Z<sup>-b,f</sup></i> | 246 ± 32 (n=6)            | 89.4 (n=1476)              |
| <i>oma-1(zu405te33); oma-2(tn1764) lon-3(e2175) sel-10(ar41)</i>                    | 196 ± 56 (n=6)            | 84.9 (n=1175)              |

1623 <sup>a</sup> Average number of embryos laid per worm ± standard deviation.

1624 <sup>b</sup> M+Z<sup>-</sup> animals were the progeny of *nT1[qIs51]* balancer-containing parents, which are  
 1625 heterozygous for both *oma-1* and *oma-2*. All other animals were the progeny of parents  
 1626 of the listed genotype.

1627 <sup>c</sup> Sterile, with a defect in meiotic maturation as described by Detwiler *et al.* 2001.

1628 <sup>d</sup> Percent embryo lethality was variable among the 12 parents analyzed; it ranged  
1629 between 6 and 35%.

1630 <sup>e</sup> These animals lay many eggs, none of which hatch (n=30).

1631 <sup>f</sup> These animals lay many eggs, some of which hatch (n=24).

1632

1633 **Table 3 *sel-10* mutant brood sizes at 20° and 25°C**

| GENOTYPE                                             | T (°C) | BROOD SIZE                      |
|------------------------------------------------------|--------|---------------------------------|
| wild type                                            | 20     | 304.0 ± 31.1 (n=29)             |
| wild type <sup>a</sup>                               | 25     | 266.8 ± 39.0 (n=19)             |
| <i>sel-10(ok1632)</i> <sup>a</sup>                   | 20     | 258.3 ± 67.7 (n=30)             |
| <i>sel-10(ok1632)</i> <sup>a</sup>                   | 25     | 72.2 ± 34.0 <sup>b</sup> (n=30) |
| <i>lin-41(tn1487ts); sel-10(ok1632)</i> <sup>c</sup> | 20     | 3.2 ± 3.4 (n=53)                |
| <i>lin-41(tn1487ts)</i> <sup>d</sup>                 | 20     | 41.4 ± 23.8 (n=36)              |
| <i>lon-3(e2175)</i>                                  | 20     | 294.5 ± 36.7 (n=20)             |
| <i>lon-3(e2175) sel-10(ar41)</i>                     | 20     | 280.2 ± 40.1 (n=20)             |

1634 <sup>a</sup> Newly fertilized embryos were collected at 15°C and shifted to 25°C.

1635 <sup>b</sup> Approximately 10.0 ± 5.3% of *sel-10(ok1632)* hermaphrodites (n=3568)

1636 are infertile, exhibiting incompletely penetrant sterility or maternal-effect

1637 lethality when grown and examined for seven generations at 25°C.

1638 <sup>c</sup> The progeny of *sel-10(ok1632); lin-41(tn1487ts)/hT2[qIs48]*

1639 hermaphrodites.

1640 <sup>d</sup> The progeny of *lin-41(tn1487ts)/hT2(qIs48)* hermaphrodites.

1641

1642

1643

1644

1645

## FIGURE LEGENDS

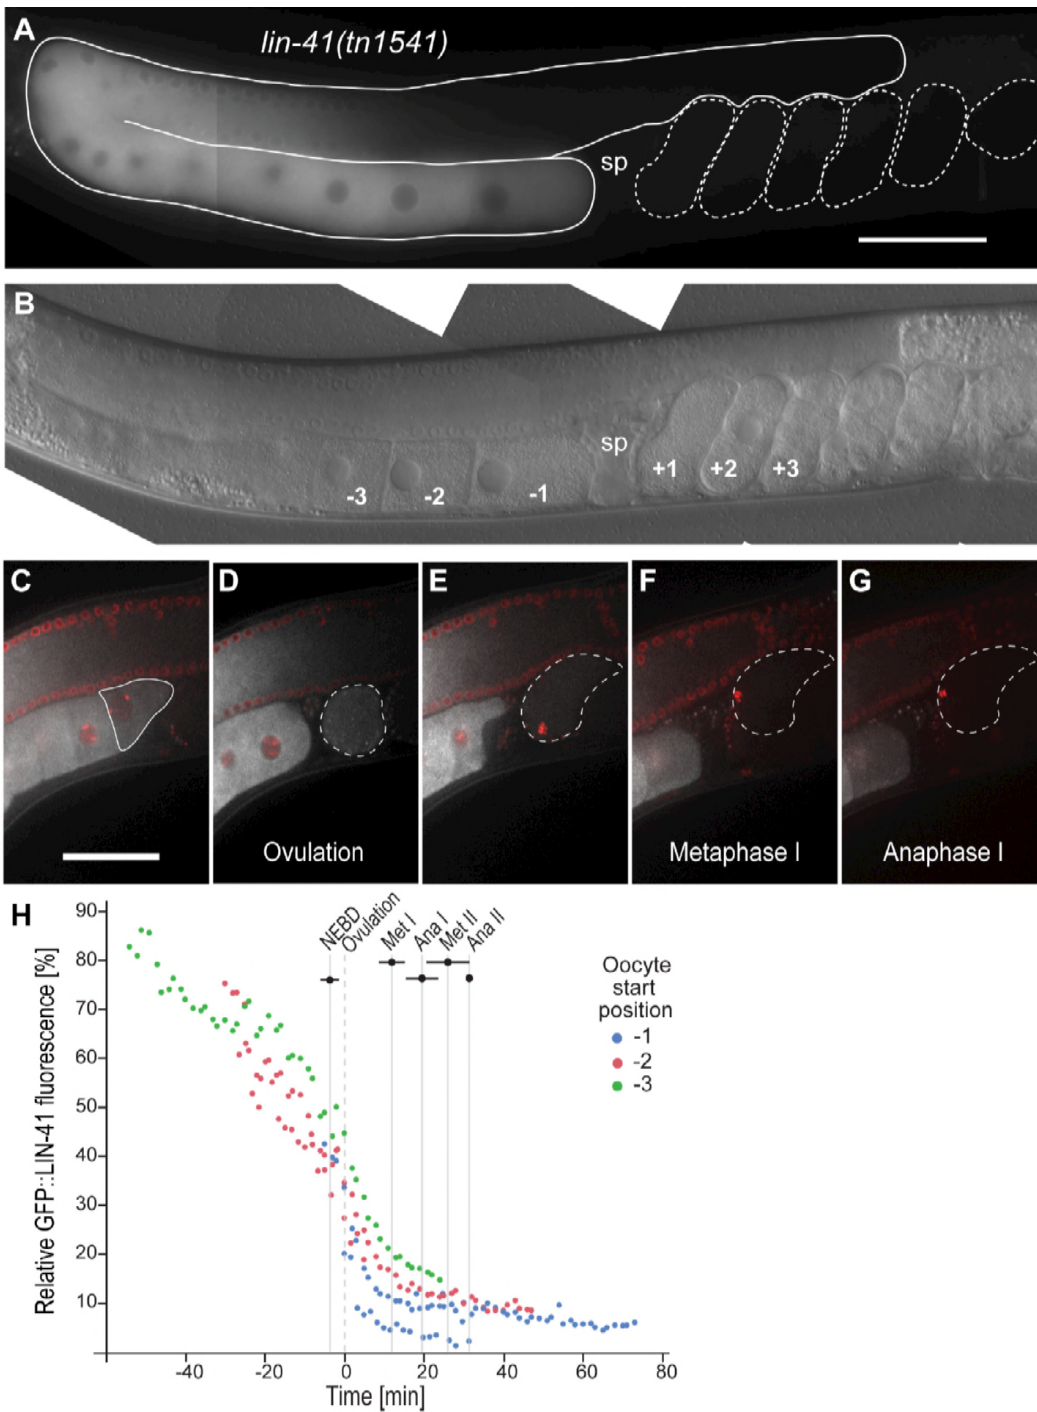

1646

1647 FIGURE 1. GFP::LIN-41 is eliminated during the first meiotic division. (A, B) Composite GFP (A)

1648 and DIC (B) images of a *lin-41(tn1541)[gfp::tev::s-tag::lin-41]* adult hermaphrodite. GFP::LIN-41

1649 is apparent in the middle and proximal regions of the germline (solid outline, (A)), with reduced  
1650 levels in the -1 oocyte immediately adjacent to the spermatheca (sp). The positions of some  
1651 embryos (dashed outlines, (A)) and oocytes are indicated relative to the spermatheca in (B); a  
1652 fertilized embryo in the spermatheca would be at the zero position. These labels and naming  
1653 conventions are used throughout. 100 ms GFP exposures; scale bar, 50  $\mu\text{m}$ . (C-G) Time-lapse  
1654 images of GFP::LIN-41 (white) and mCHERRY::HISTONE-labeled chromosomes (red) were  
1655 acquired in a living *lin-41(tn1541); itIs37[pie-1p::mCherry::H2B::pie-1 3'UTR, unc-119(+)]* adult  
1656 hermaphrodite by confocal microscopy. Images are shown for select time points (*t*) prior to  
1657 meiotic maturation (C, *t*=-4.5 min), at ovulation (D, *t*=0 min), and during the first meiotic  
1658 division (E, *t*=+4 min; F, *t*=+11.8 min; G, *t*=+16.9 min) as an individual oocyte (C, solid outline)  
1659 progresses from the -1 to the +1 position and through the OET (D-G, dashed outlines). Scale  
1660 bar, 50  $\mu\text{m}$ . Movie S1, worm #1, shows the complete time-lapse series from which the still  
1661 images were taken. (H) Five oocytes were imaged as they progressed from the -1 position  
1662 through meiotic divisions; the relative amount of background-corrected GFP::LIN-41 with  
1663 respect to distal oocytes is shown on the graph at each time point. Three of the oocytes were  
1664 also imaged at earlier stages as they moved from a more distal location (-2 oocyte (red) or -3  
1665 oocyte (green) position) into the -1 oocyte position (blue), as indicated. Timing on the x-axis is  
1666 relative to ovulation (*t*=0). Bars indicate the standard deviation for different meiotic events  
1667 (e.g.: NEBD, nuclear envelope breakdown; Met, metaphase; Ana, anaphase).

1668

1669

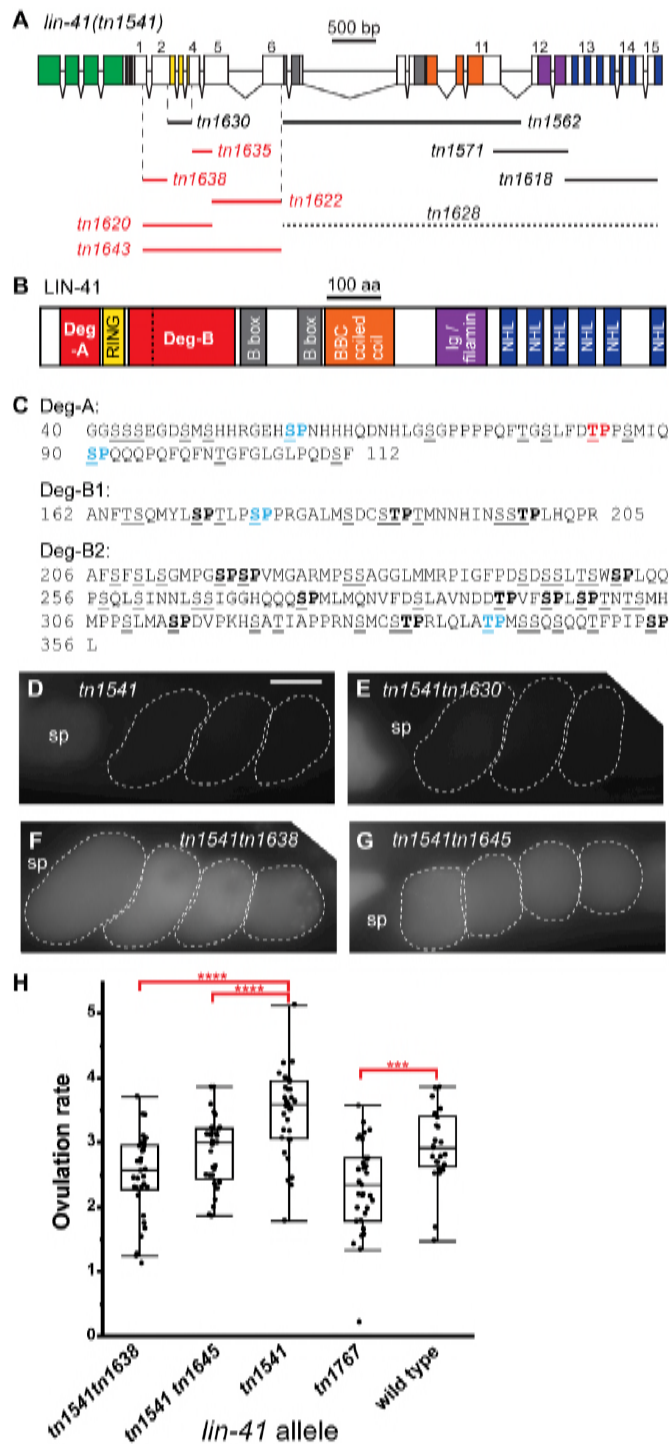

1670

1671 FIGURE 2. GFP::LIN-41 elimination requires two non-overlapping regions of LIN-41 and a

1672 potential phosphorylation site. (A) The exon-intron structure and deletion analysis of *lin-*

1673 *41(tn1541)*. Colored boxes indicate exonic regions that encode GFP (green) or previously  
1674 described protein domains of LIN-41 (see (B)). Deletions made in the context of *lin-41(tn1541)*  
1675 are drawn as lines, labeled with a deletion-specific allele name, below LIN-41-encoding exons  
1676 and introns (exons labeled 1–15). GFP::LIN-41 can be detected in the germline of most deletion  
1677 mutants (solid lines), with one exception (*tn1628*, dotted line). Deletions in red prevent the  
1678 elimination of GFP::LIN-41 from early embryos. The vertical dashed lines delimit the beginning  
1679 of Deg-A and the end of Deg-B, respectively. (B) The previously described (RING (yellow), B-box  
1680 (gray), BBC (orange), Ig/filamin (purple), NHL (blue)) and newly-identified (Deg (red)) protein  
1681 domains of LIN-41. The vertical dashed line in (B) indicates the two parts of Deg-B, B1 and B2,  
1682 which are individually removed in *lin-41(tn1541tn1635)* and *lin-41(tn1541tn1622)*, respectively.  
1683 (C) The amino acid sequences of Deg-A, Deg-B1 and Deg-B2. Many of the amino acids are  
1684 serines and threonines (underlined); some are potential targets of proline-directed  
1685 serine/threonine [S/T] kinases (bold) and have had the [S/T] residue changed to an alanine  
1686 (colored and bold) in the context of *lin-41(tn1541)*. The T83A mutation in Deg-A results in the  
1687 persistence of GFP::LIN-41[T83A] in embryos (red), whereas the other changes do not  
1688 (indicated in blue font). (D–G) GFP::LIN-41 is eliminated from the early embryos (dashed  
1689 outlines) of *lin-41(tn1541)* (D, control) and *lin-41(tn1541tn1630)* (E, RING deleted) homozygous  
1690 mutants but persists in the early embryos of *lin-41(tn1541tn1638)* (F, Deg-A deleted) and *lin-*  
1691 *41(tn1541tn1645)* (G, LIN-41[T83A]) homozygous mutants. The position of the spermatheca  
1692 (sp) is indicated, for reference. 100 ms GFP exposures; scale bar, 20  $\mu\text{m}$ . (H) The rate of  
1693 ovulation is slightly reduced in mutants with a compromised LIN-41 Deg-A domain. Ovulation  
1694 rate is expressed as the number of ovulations/gonad arm/hour and was measured in at least 25

1695 Day 2 adults. Significance was determined using a Student's *t* test:  $P < .001$  is indicated by 3  
1696 asterisks,  $P < .0001$  is indicated by 4 asterisks. *itIs37[pie-1p::mCherry::H2B::pie-1 3'UTR, unc-*  
1697 *119(+)]* was also present in each of the GFP::LIN-41-expressing strains; it is not expected to alter  
1698 the ovulation rate.

1699



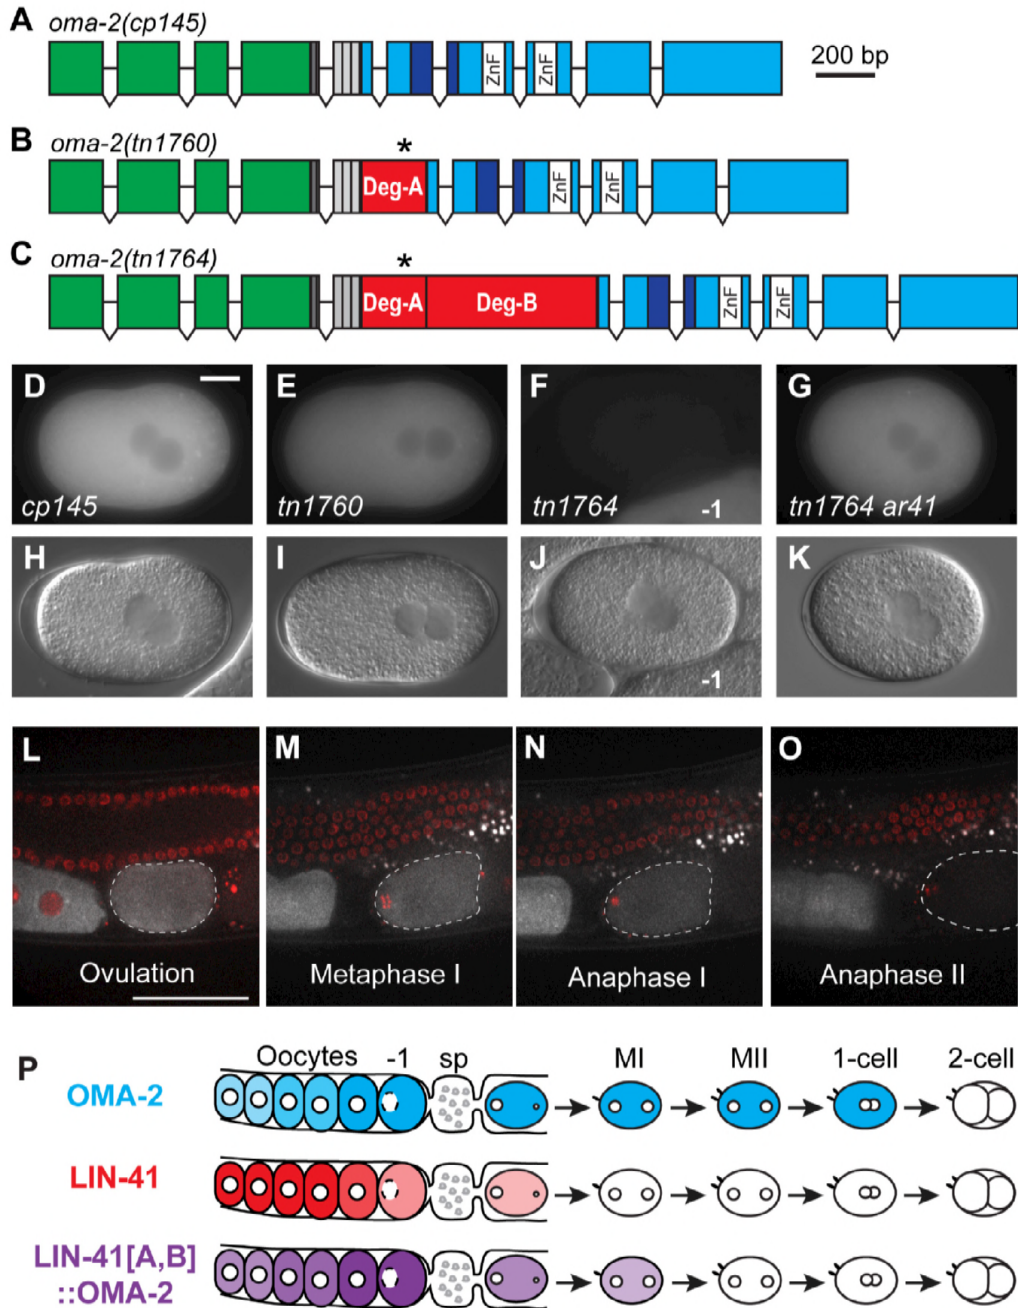

1700

1701 FIGURE 3. LIN-41 degradation domains when implanted into mNG::OMA-2 promote its rapid

1702 elimination during meiosis. (A–C) The exon-intron structures of *oma-*

1703 *2(cp145[mng::tev::3xflag::oma-2])*, *oma-2(tn1760[mng::tev::3xflag::deg-a::oma-2])* and *oma-*

1704 *2(tn1764[mng::tev::3xflag::deg-a::deg-b::oma-2])*. Boxes represent exonic regions that encode

1705 mNeonGreen (green), the tobacco etch virus cleavage site (TEV, dark gray), FLAG epitope tags  
1706 (light gray), LIN-41 Deg-A and Deg-B domains (red), the likely TAF-4 interaction domain of OMA-  
1707 2 (dark blue), two OMA-2 CCCH zinc fingers (white), and other OMA-2 coding sequences (cyan).  
1708 The position of LIN-41 T83 within the LIN-41 Deg-A domain is indicated by an asterisk. (D–K)  
1709 GFP (D–G) and DIC (H–K) images of *oma-2(cp145)* (D,H), *oma-2(tn1760)* (E,I), *oma-2(tn1764)* (F,  
1710 J) and *oma-2(tn1764) lon-3(e2175) sel-10(ar41)* (G, K) 1-cell embryos at pronuclear meeting (E,  
1711 I), or just slightly later, as the pronuclei begin a counter-clockwise rotation (D, F–G, H, J, and K)  
1712 prior to NEBD and the first mitotic division. Part of a –1 oocyte is visible in (F, J) and is indicated  
1713 for reference. 150 ms GFP exposures; scale bar, 10  $\mu$ m. (L–O) Time-lapse images of mNG::Deg-  
1714 A,B::OMA-2 (white) and mCHERRY::HISTONE-labeled chromosomes (red) were acquired in a  
1715 living *oma-2(tn1764); itIs37[pie-1p::mCherry::H2B::pie-1 3'UTR, unc-119(+)]* adult  
1716 hermaphrodite by confocal microscopy. Images are shown for select time points (*t*) at ovulation  
1717 (L, *t*=0 min), during the first (M, *t*=+5 min, N, *t*=+10.5 min) and second meiotic divisions (O,  
1718 *t*=+24.5 min) as an embryo (dashed outline) progresses through both meiotic divisions. See  
1719 Movie S3 for the complete time-lapse sequence. Scale bar, 50  $\mu$ m. (P) A visual summary of the  
1720 dynamic expression patterns of mNG::OMA-2 (cyan), GFP::LIN-41 (red) and mNG::Deg-  
1721 A,B::OMA-2 (purple). Oocytes are to the left and embryos are to the right of the spermatheca  
1722 (sp). Meiotic embryos (MI, MII) have completed their respective divisions.

1723

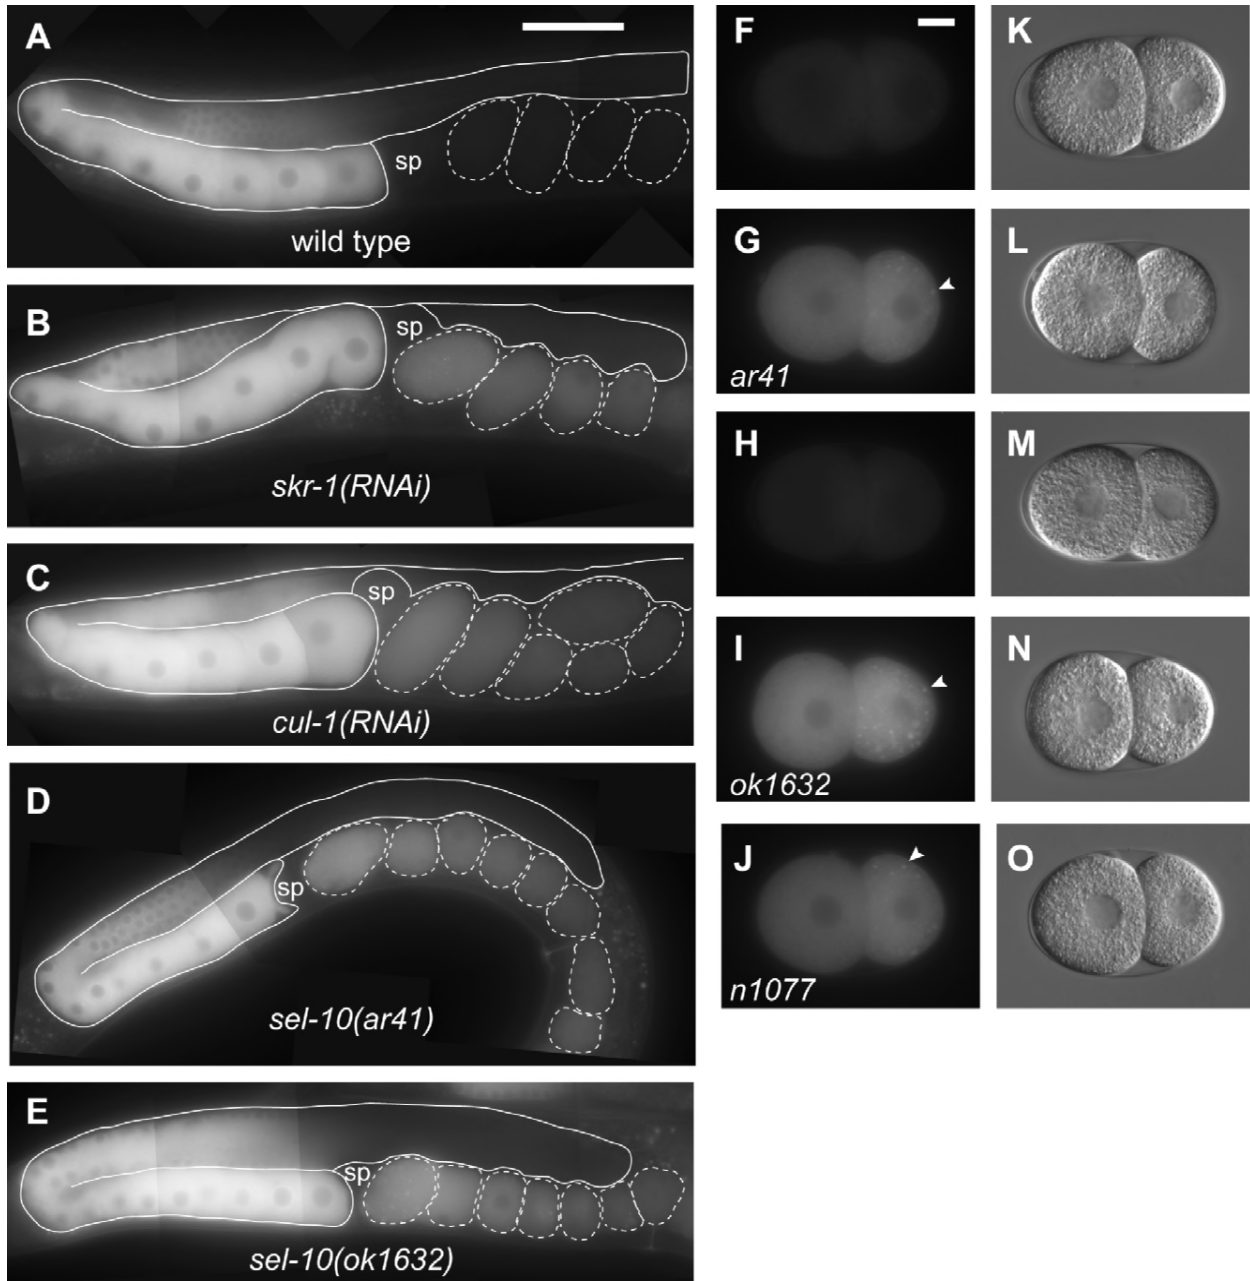

1724

1725 FIGURE 4. Subunits of the SCF<sup>SEL-10</sup> E3 ubiquitin ligase are required for the elimination of  
1726 GFP::LIN-41 from early embryos. (A–E) Composite images of GFP::LIN-41 in adult *rrf-1(pk1417)*  
1727 *lin-41(tn1541)* hermaphrodites fed control RNAi bacteria (A), and adult hermaphrodites with  
1728 reduced SCF<sup>SEL-10</sup> E3 ubiquitin ligase activity (B–E): *lin-41(tn1541); skr-1(RNAi)* (B), *rrf-1(pk1417)*  
1729 *lin-41(tn1541); cul-1(RNAi)* (C), *lin-41(tn1541); lon-3(e2175) sel-10(ar41)* (D), and *lin-41(tn1541);*

1730 *sel-10(ok1632)* (E). 100 ms GFP exposures, brightened slightly (and equivalently) to better  
1731 visualize embryonic GFP::LIN-41; scale bar, 50  $\mu\text{m}$ . (F–O) Images of 2-cell embryos removed  
1732 from the uterus of hermaphrodites were imaged for GFP (F–J) and DIC (K–O); the genotypes  
1733 were as follows: *lin-41(tn1541); lon-3(e2175)* (F, K), *lin-41(tn1541); lon-3(e2175) sel-10(ar41)* (G,  
1734 L), *lin-41(tn1541)* (H, M), *lin-41(tn1541); sel-10(ok1632)* (I,N), and *lin-41(tn1541); sel-10(n1077)*  
1735 (J, O). Arrowheads indicate a few of the GFP::LIN-41 aggregates in the posterior blastomeres of  
1736 *sel-10* mutant embryos, which likely correspond to P granules. 300 ms GFP exposures; scale bar,  
1737 10  $\mu\text{m}$ .

1738

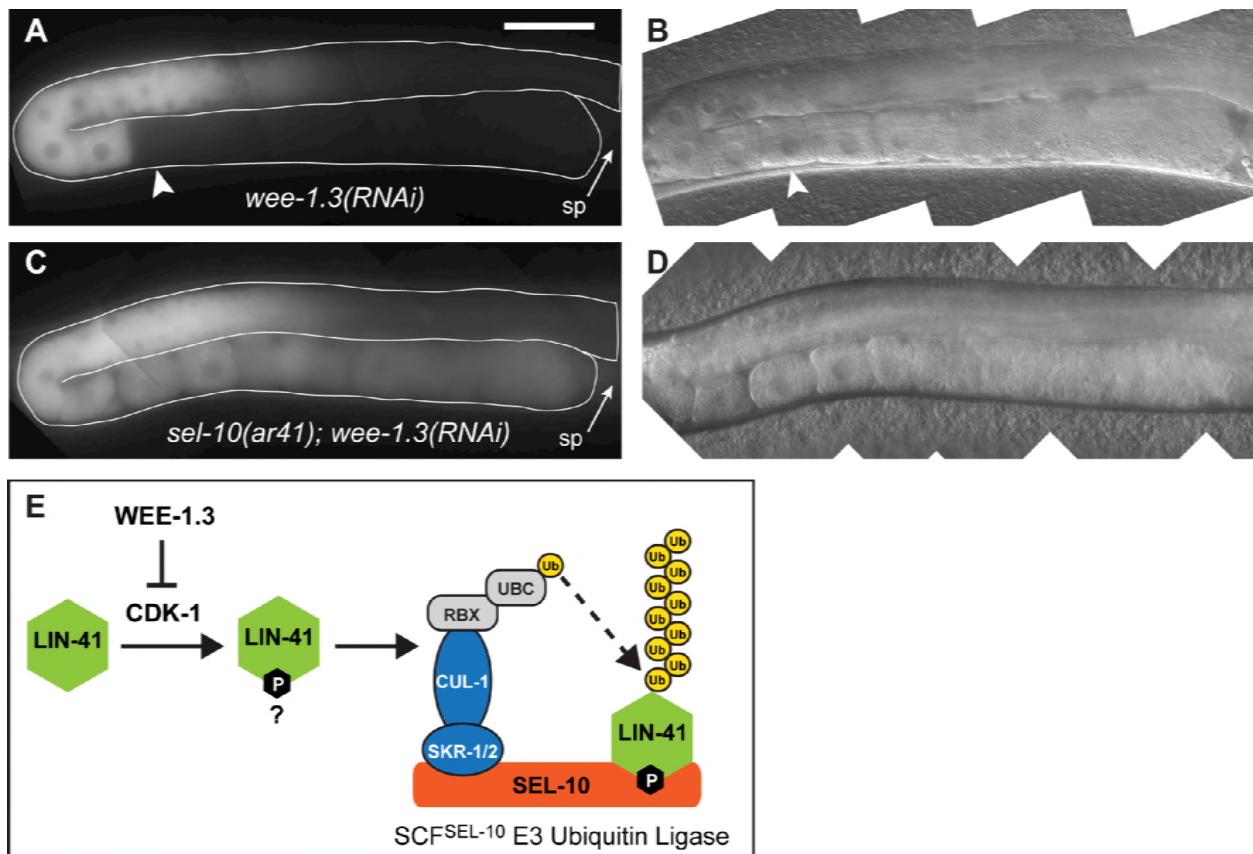

1739

1740 FIGURE 5. SEL-10 is required for the WEE-1.3-inhibited degradation of GFP::LIN-41. (A–D)

1741 Composite GFP (A, C) and DIC (B, D) images of *lin-41(tn1541); lon-3(e2175); wee-1.3(RNAi)* (A,

1742 B) and *lin-41(tn1541); lon-3(e2175); sel-10(ar41); wee-1.3(RNAi)* (C, D) animals. GFP::LIN-41 is

1743 prematurely eliminated from oocytes by *wee-1.3(RNAi)* (arrowhead), but persists in abnormal

1744 oocytes near the spermatheca (sp, arrow) in *sel-10(ar41); wee-1.3(RNAi)* animals (C, D),

1745 suggesting that SEL-10 is required for this process. 150 ms GFP exposures, brightened slightly;

1746 scale bar, 50  $\mu$ m. (E) A simple model for the elimination of LIN-41 (green) that incorporates the

1747 known molecular functions of WEE-1.3 kinase, cyclin-dependent kinase (CDK-1) and subunits of

1748 the SCF<sup>SEL-10</sup> E3 ubiquitin ligase. In brief, we hypothesize that SEL-10 (orange) may recognize

1749 phosphorylated LIN-41 (green) and trigger its ubiquitin-mediated degradation in collaboration

1750 with the other SCF E3 ubiquitin ligase subunits, SKR-1/2 (blue) and CUL-1 (blue). CUL-1  
1751 orthologs bind RING finger proteins (RBX, gray), which recruit a ubiquitin-conjugating enzyme  
1752 (UBC, gray) that catalyzes the transfer of ubiquitin (yellow) to protein substrates, such as LIN-  
1753 41. Subsequent recruitment of poly-ubiquitinated substrates to the proteasome results in  
1754 degradation (not shown). This model is consistent with the epistatic relationship between *wee-*  
1755 *1.3(RNAi)* and *sel-10(ar41)* with respect to the elimination of GFP::LIN-41, but other models are  
1756 also possible.

1757

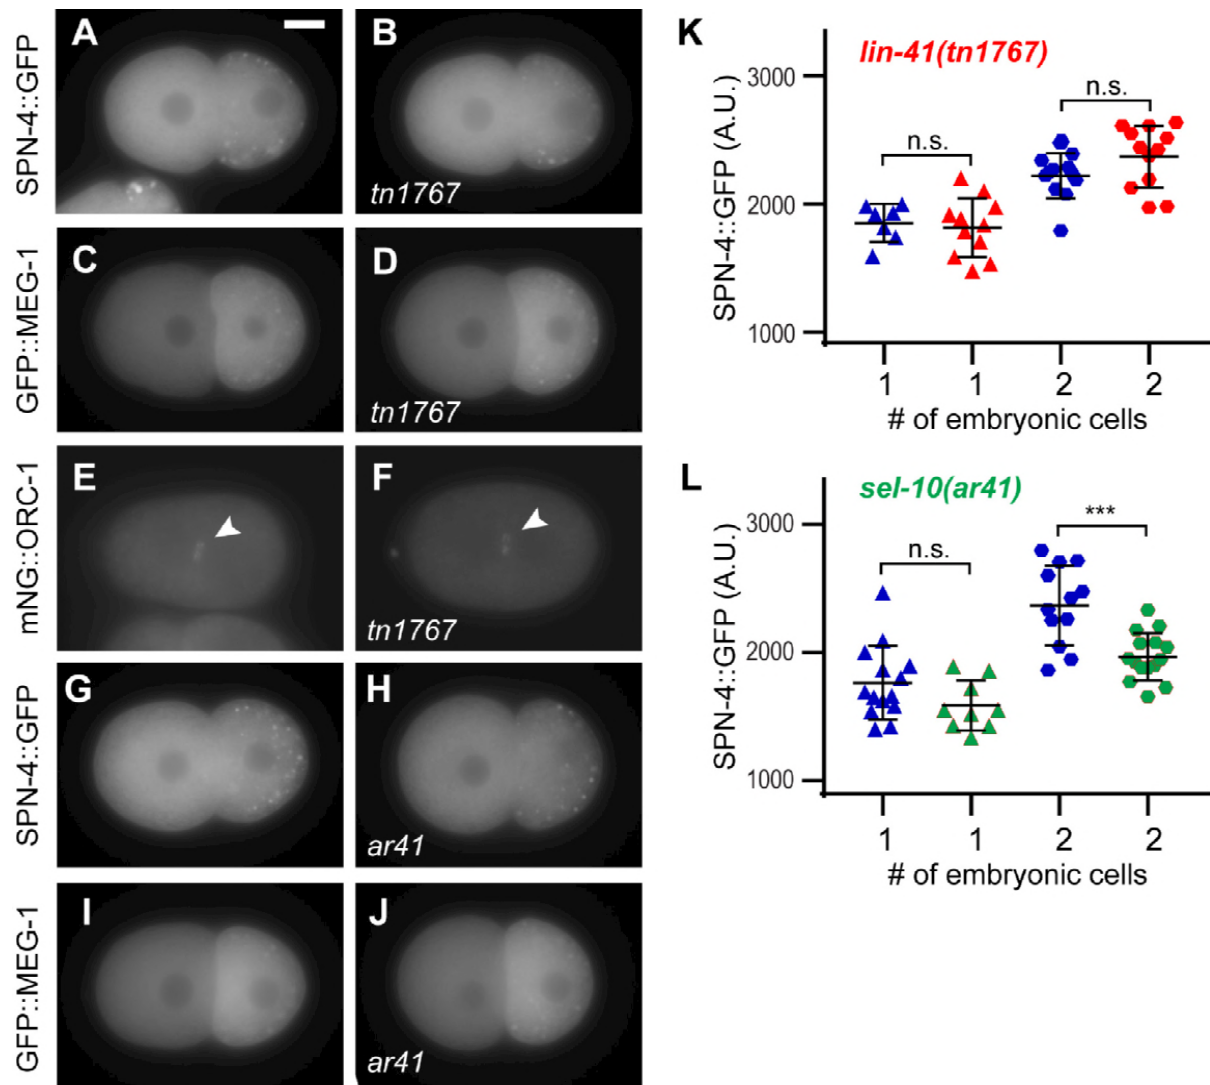

1758

1759 FIGURE 6. Persisting LIN-41 or LIN-41[T83A] does not strongly inhibit the expression of LIN-41  
 1760 targets of translational repression in young embryos. (A–J) Young embryos express similar  
 1761 levels of SPN-4::GFP (A, B, G, and H), GFP::MEG-1 (C, D, I, and J) and mNG::ORC-1 (arrowhead in  
 1762 E, F) when ectopic LIN-41[T83A] (B, D, and F; *lin-41(tn1767)* mutant embryos), ectopic LIN-41  
 1763 (H, J; *sel-10(ar41)* mutant embryos) or normal (undetectable) levels of LIN-41 (B, D, F, H, and J)  
 1764 are present. Exposures were 100 ms for SPN-4::GFP, 200 ms for GFP::MEG-1 and 600 ms for  
 1765 mNG::ORC-1; scale bar, 10  $\mu$ m. (K) Quantification of the intensity of SPN-4::GFP expression in

1766 *spn-4(tn1699)* and *lin-41(tn1767)*; *spn-4(tn1699)* 1 and 2-cell embryos. No significant  
1767 differences were seen (n.s.). (L) Quantification of the intensity of SPN-4::GFP expression in *spn-*  
1768 *4(tn1699)*; *lon-3(e2175)* and *spn-4(tn1699)*; *lon-3(e2175) sel-10(ar41)* 1 and 2-cell embryos.  
1769 Levels appeared to be slightly lower in the *sel-10(ar41)* 2-cell embryos ( $P < .001$ ). Note that the  
1770 slightly reduced level of SPN-4::GFP in image (H) relative to image (G) accurately illustrates the  
1771 very modest magnitude of this difference in expression.

1772



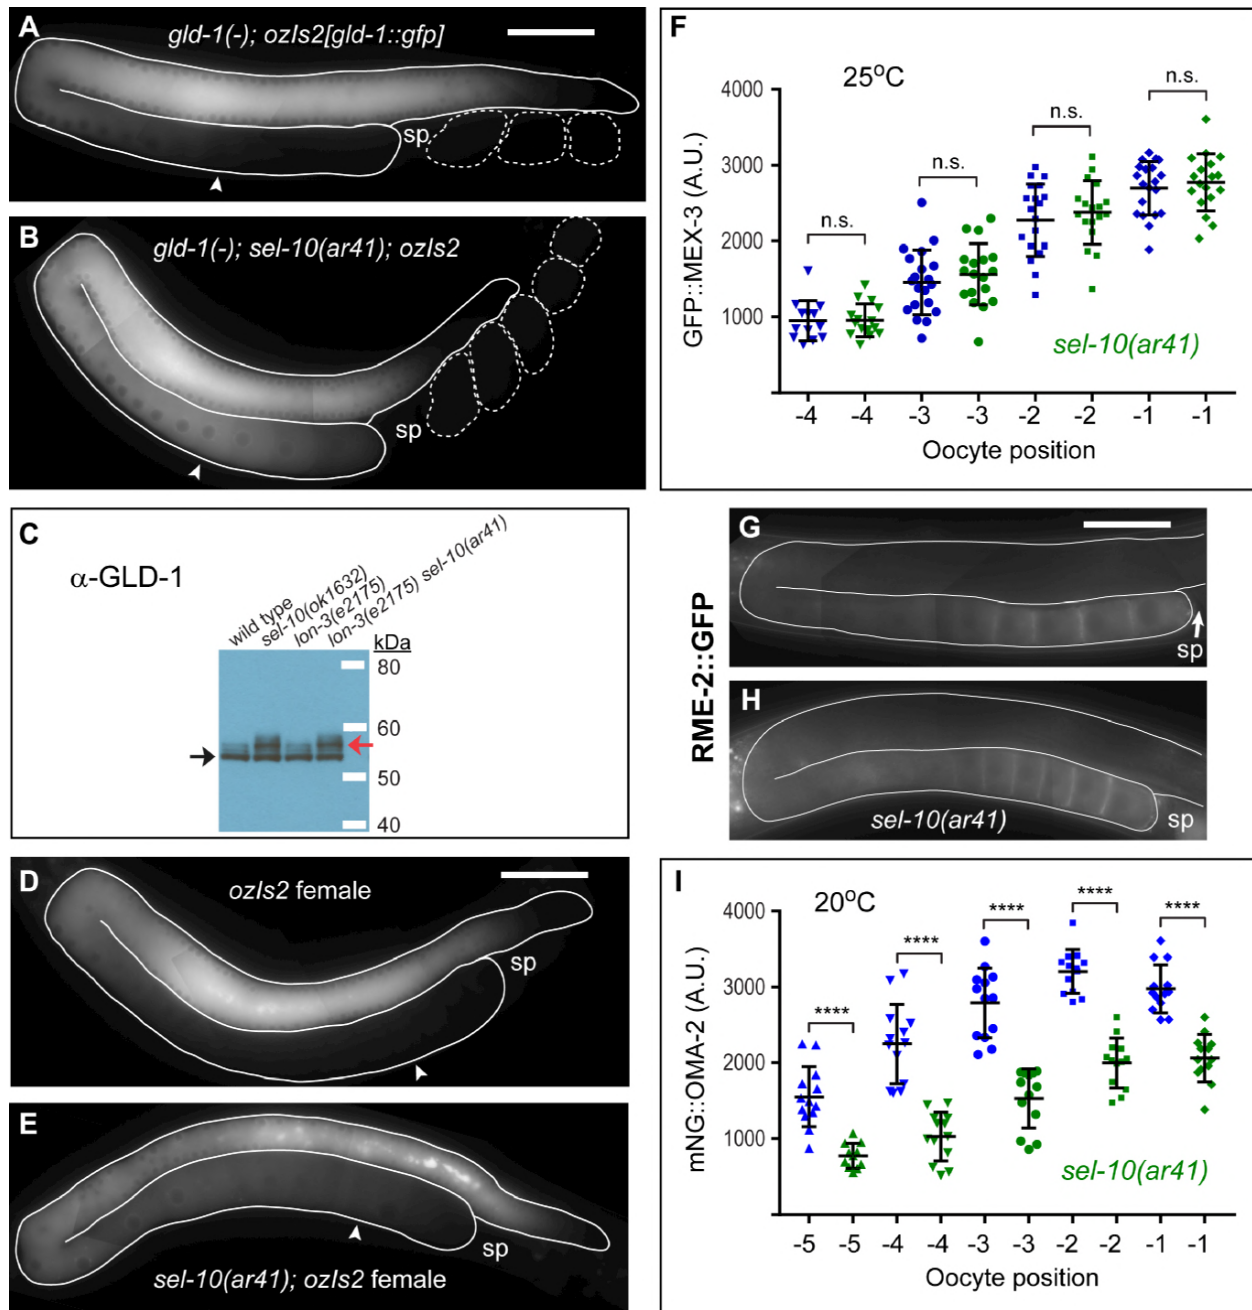

1773

1774 FIGURE 7. GLD-1 persists at elevated levels in the oocytes of *sel-10(ar41)* mutants. (A, B)

1775 Composite images of GLD-1::GFP in *gld-1(q485); lon-3(e2175); ozls2[gld-1::gfp]* (A) and *gld-*

1776 *1(q485); lon-3(e2175) sel-10(ar41); ozls2[gld-1::gfp]* (B) adult hermaphrodites. GLD-1::GFP

1777 levels remain elevated in the proximal oocytes (e.g.: -4 oocytes, arrowheads) of *sel-10(ar41)*

1778 animals (B) relative to controls (A). 17 ms GFP exposures, brightened slightly. (C) Slow-migrating

1779 forms of GLD-1 (red arrow) are more abundant in *sel-10(lf)* adult hermaphrodites than in *sel-*  
1780 *10(+)* controls, where the fast-migrating form of GLD-1 (black arrow) predominates. (D, E)  
1781 Composite images of GLD-1::GFP in *fog-3(q470); lon-3(e2175); ozls2[gld-1::gfp]* (D) and *fog-*  
1782 *3(q470); lon-3(e2175) sel-10(ar41); ozls2[gld-1::gfp]* females (E). GLD-1::GFP levels are elevated  
1783 in the proximal oocytes (e.g.: -4 oocytes, arrowheads) of *sel-10(ar41)* females (B) relative to  
1784 controls (A), although this is not as dramatic as in hermaphrodites. A somewhat longer GFP  
1785 exposure (35 ms, brightened slightly) was needed than in (A and B), likely due to the presence  
1786 of endogenous GLD-1. (F) Quantification of the intensity of GFP::MEX-3 in the proximal oocytes  
1787 of *lon-3(e2175); mex-3(tn1753)* and *lon-3(e2175) sel-10(ar41); mex-3(tn1753)* hermaphrodites  
1788 at 25°C. No significant differences were seen (n.s.). (G-H) Composite images of *lon-3(e2175);*  
1789 *pwls116[rme-2p::rme-2::GFP::rme-2 3'UTR]* (G) and *lon-3(e2175) sel-10(ar41); pwls116 [rme-*  
1790 *2p::rme-2::GFP::rme-2 3'UTR]* (H) hermaphrodites at 22°C. 300 ms GFP exposures. Neither  
1791 target of GLD-1 translational repression (MEX-3, RME-2) was strongly or even marginally  
1792 reduced in expression in *sel-10(ar41)* oocytes. (I) Quantification of the intensity of mNG::OMA-2  
1793 in the proximal oocytes of *oma-2(cp145) lon-3(e2175)* and *oma-2(cp145) lon-3(e2175) sel-*  
1794 *10(ar41)* hermaphrodites at 20°C. Differences in expression were highly significant ( $P < .0001$ ,  
1795 indicated by 4 asterisks), but relatively modest in magnitude. For example, we measured a 37%  
1796 reduction in average fluorescence in the -2 oocytes of *sel-10(ar41)* animals relative to the same  
1797 oocytes in control animals. Scale bar, 50  $\mu\text{m}$  (A, B, D, E, G, and H).
